# Supplementary material
Source: MDPI journal article supplement (https://www.mdpi.com/2073-4344/13/7/1084)

## Supplementary Materials

### Substitution of Secondary Propargylic Phosphates with Aryl-Lithium-based Copper Reagents

Yuichi Kobayashi <sup>1,2,\*</sup>, Takayuki Hirotsu <sup>1</sup>, Yosuke Haimoto <sup>3</sup>, Narihito Ogawa <sup>3</sup>

<sup>1</sup> Department of Bioengineering, Tokyo Institute of Technology, 4259 Nagatsuta-cho, Midori-ku, Yokohama 226-8501, Japan

<sup>2</sup> Present address: Organization for the Strategic Coordination of Research and Intellectual Properties, Meiji University, 1-1-1 Higashimita, Tama-ku, Kawasaki 214-8571, Kanagawa, Japan

<sup>3</sup> Department of Applied Chemistry, Meiji University, 1-1-1 Higashimita, Tama-ku, Kawasaki 214-8571, Kanagawa, Japan

† Correspondence: ykobayas@bio.titech.ac.jp

### Table of Contents

|                                |    |
|--------------------------------|----|
| 1. Synthesis of phosphates     | S2 |
| 2. Reference                   | S5 |
| 3. NMR spectra and chiral HPLC | S6 |

## 1. Synthesis of phosphates

### 1.1. General information

According to the previous method [S1], racemic phosphates **1a–c** and **7** and enantiomerically enriched phosphates (*S*)-**1a** (97–98% ee), (*S*)-**7** (96% ee), and (*S*)-**8** (95% ee) were synthesized. Among them, synthesis of (*S*)-**1a**, (*S*)-**7**, and (*S*)-**8** are described herein.

### 1.2. (*S*)-Diethyl (5-phenyl-1-(trimethylsilyl)pent-1-yn-3-yl) phosphate [(*S*)-**1a**]

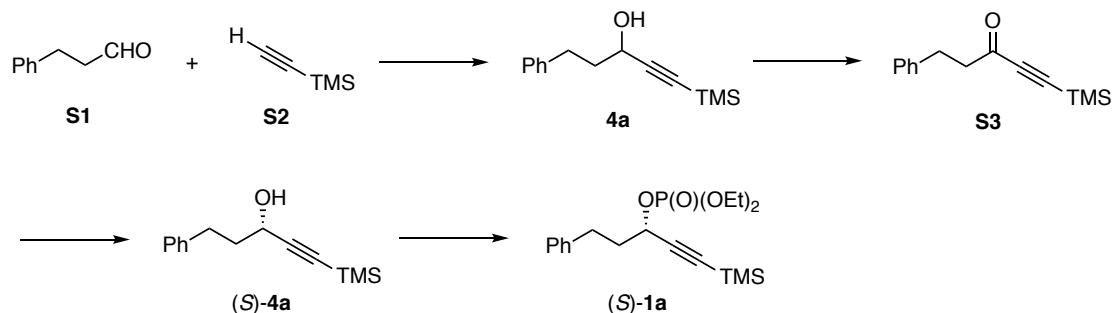

To a solution of TMS acetylene **S2** (11.0 mL, 77.8 mmol) in THF (90 mL) was added *n*-BuLi (1.67 M, 34.0 mL, 56.8 mmol) dropwise at  $-70^{\circ}\text{C}$ . After the addition, the solution was stirred at  $-70^{\circ}\text{C}$  for 30 min and added aldehyde **S1** (5.0 mL, 38.0 mmol). The solution was gradually warmed to  $-30^{\circ}\text{C}$  over 2 h and poured into saturated  $\text{NH}_4\text{Cl}$  with vigorous stirring. The mixture was extracted with EtOAc three times. The combined extracts were dried over  $\text{MgSO}_4$  and concentrated to give an oil, which was purified by chromatography on silica gel with hexane/EtOAc to afford **4a** (8.06 g, 91% yield):  $^1\text{H}$  NMR (300 MHz,  $\text{CDCl}_3$ )  $\delta$  0.19 (s, 9 H), 1.78 (d,  $J = 5.4$  Hz, 1 H), 1.94–2.02 (m, 2 H), 2.80 (t,  $J = 8.0$  Hz, 2 H), 4.36 (dt,  $J = 5.4, 6.6$  Hz, 1 H), 7.15–7.33 (m, 5 H).

To a mixture of alcohol **4a** (1.45 g, 6.24 mmol) and Celite (5.53 g) in  $\text{CH}_2\text{Cl}_2$  (30 mL) was added PCC (1.66 g, 7.70 mmol) portionwise. The mixture was stirred at rt for 15 h, diluted with hexane, and filtered through a pad of Celite. The filtrate was concentrated and the crude product was purified by chromatography on silica gel with hexane/EtOAc to afford ketone **S3** (1.28 g, 88% yield):  $^1\text{H}$  NMR (300 MHz,  $\text{CDCl}_3$ )  $\delta$  0.26 (s, 9 H), 2.84–3.02 (m, 4 H), 7.18–7.37 (m, 5 H).

A mixture of  $\text{RuCl}[(1S,2S)\text{-TsDPEN}](p\text{-cymene})$  (56 mg, 0.088 mmol) and KOH (15 mg, 0.266 mmol) in  $\text{CH}_2\text{Cl}_2$  (1 mL) was stirred at rt for 5 min. The mixture was washed with  $\text{H}_2\text{O}$  three times and the  $\text{CH}_2\text{Cl}_2$  solution was transferred to another flask. The solution was dried

over  $\text{CaH}_2$ , decanted through a plug of cotton, and concentrated to afford a purple solid, which was dissolved in *i*-PrOH (1.2 mL) and added to a solution of ketone **S3** (669 mg, 2.90 mmol) in *i*-PrOH (6 mL). The solution was stirred at rt for 14 h and concentrated. The resulting residue was purified by chromatography on silica gel with hexane/EtOAc to produce alcohol (*S*)-**4a** (651 mg, 96% yield). The  $^1\text{H}$  NMR spectrum was identical with that for racemic **4a** delineated above.

To an ice-cold solution of alcohol (*S*)-**4a** (941 mg, 4.05 mmol) and *N*-methylimidazole (0.49 mL, 6.15 mmol) in  $\text{CH}_2\text{Cl}_2$  (20 mL) was added diethyl chlorophosphate (1.17 mL, 8.07 mmol) dropwise. The solution was stirred at rt for 20 h and poured into saturated  $\text{NaHCO}_3$ . The mixture was extracted with  $\text{CH}_2\text{Cl}_2$  twice. The combined extracts were dried over  $\text{MgSO}_4$  and concentrated. The remaining oil was purified by chromatography on silica gel with hexane/EtOAc to afford phosphate (*S*)-**1a** (1.40 g, 94% yield): 97% ee by chiral HPLC analysis (Chiralcel OD-H, hexane/*i*-PrOH (98:2), 0.3 mL/min, 40 °C,  $t_R/\text{min}$  = 25.6 (minor) and 27.1 (major));  $^1\text{H}$  NMR (400 MHz,  $\text{CDCl}_3$ )  $\delta$  0.19 (s, 9 H), 1.35 (t,  $J$  = 7.0 Hz, 6 H), 2.06–2.23 (m, 2 H), 2.80 (t,  $J$  = 7.6 Hz, 2 H), 4.07–4.22 (m, 4 H), 4.99 (dt,  $J$  = 7.6, 6.4 Hz, 1 H), 7.17–7.35 (m, 5 H).

The  $^1\text{H}$  NMR spectra of **4a** and **S3** and (*S*)-**1a** were consistent with the reported data.[S1]

### 1.3. (*S*)-1,5-Diphenylpent-1-yn-3-yl diethyl phosphate [(*S*)-**7**]

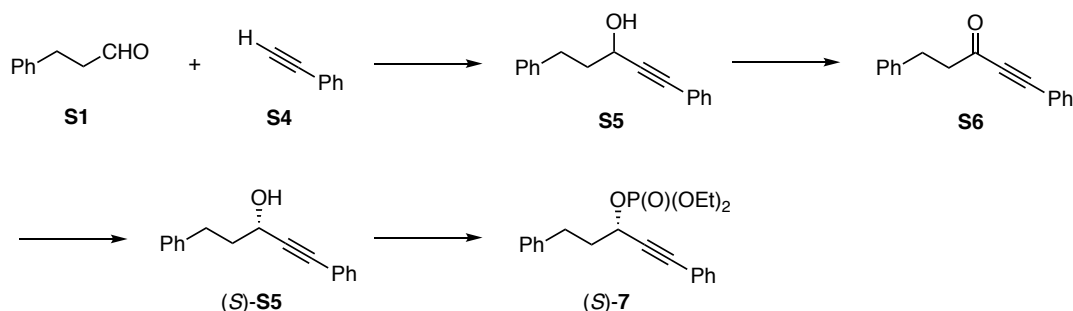

According to the above method for the synthesis of (*S*)-**1a**, a hexane solution of *n*-BuLi (1.65 M, 6.90 mL, 11.4 mmol) was added to a solution of Ph acetylene **S4** (1.70 mL, 15.5 mmol) in THF (10 mL) at  $-70$  °C. After 30 min at  $-70$  °C, aldehyde **S1** (1.0 mL, 7.60 mmol) was added. The solution was stirred at  $-70$  °C for 1 h and poured into saturated  $\text{NH}_4\text{Cl}$  to afford alcohol **S5**, which was passed through a short column of silica gel with hexane/EtOAc. A mixture of **S5**, PCC (2.07 g, 9.60 mmol), and Celite (3.95 g) in  $\text{CH}_2\text{Cl}_2$  (12 mL) was stirred at rt for 3 h and filtered through a pad of Celite. The product was purified by chromatography

on silica gel to afford ketone **S6** (801 mg, 45% yield from **S1**):  $^1\text{H}$  NMR (300 MHz,  $\text{CDCl}_3$ )  $\delta$  2.94–3.11 (m, 4 H), 7.18–7.50 (m, 8 H), 7.54–7.60 (m, 2 H). A mixture of  $\text{RuCl}[(1S,2S)\text{-TsDPEN}](p\text{-cymene})$  (64.2 mg, 0.101 mmol) and KOH (18.5 mg, 0.33 mmol) in  $\text{CH}_2\text{Cl}_2$  (1 mL) was stirred at rt for 5 min to afford the purple catalyst, which was mixed with ketone **S6** (743.2 mg, 3.17 mmol) in *i*-PrOH (16 mL). The solution was stirred at rt for 16 h to produce alcohol (*S*)-**S5** (741 mg, 97% yield) after chromatography on silica gel:  $^1\text{H}$  NMR (300 MHz,  $\text{CDCl}_3$ )  $\delta$  1.92 (d,  $J = 5.7$  Hz, 1 H), 2.08–2.18 (m, 2 H), 2.87 (t,  $J = 7.8$  Hz, 2 H), 4.60 (dt,  $J = 5.7, 6.5$  Hz, 1 H), 7.16–7.43 (m, 10 H).

Diethyl chlorophosphate (0.92 mL, 6.34 mmol) was added to an ice-cold solution of alcohol (*S*)-**S5** (748 mg, 3.17 mmol) and *N*-methylimidazole (0.76 mL, 9.53 mmol) in  $\text{CH}_2\text{Cl}_2$  (6 mL). The solution was stirred at rt for 24 h and poured into saturated  $\text{NaHCO}_3$ . The crude product was purified by chromatography on silica gel with hexane/EtOAc to afford phosphate (*S*)-**7** (902 mg, 77% yield): 96% ee by chiral HPLC analysis (Chiralcel OD-H, hexane/*i*-PrOH (98:2), 0.3 mL/min, 25 °C,  $t_R$ /min = 65.4 (minor) and 77.5 (major));  $^1\text{H}$  NMR (300 MHz,  $\text{CDCl}_3$ )  $\delta$  1.34 (dt,  $J = 1.2, 7.2$  Hz, 3 H), 1.35 (dt,  $J = 1.5, 7.2$  Hz, 3H), 2.18–2.37 (m, 2 H), 2.88 (t,  $J = 8.0$  Hz, 2 H), 4.07–4.24 (m, 4 H), 5.21 (q,  $J = 6.8$  Hz, 1 H), 7.17–7.37 (m, 8 H), 7.42–7.48 (m, 2 H). The  $^1\text{H}$  NMR spectrum of (*S*)-**7** was consistent with the reported data.[S1]

#### 1.4. (*S*)-Diethyl (1-phenyldec-4-yn-3-yl) phosphate [(*S*)-**8**]

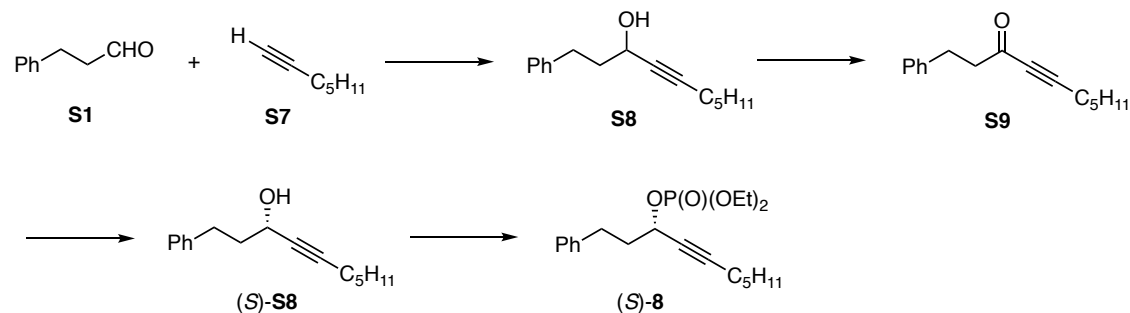

According to the above method for the synthesis of (*S*)-**1a**, a hexane solution of *n*-BuLi (1.65 M, 6.90 mL, 11.4 mmol) was added to a solution of 1-heptyne (**S7**) (2.0 mL, 15.4 mmol) in THF (10 mL) at  $-70$  °C. After 30 min at  $-70$  °C, aldehyde **S1** (1.0 mL, 7.60 mmol) was added. The solution was stirred at  $-70$  °C for 1 h and poured into saturated  $\text{NH}_4\text{Cl}$  to afford alcohol **S8**, which was passed through a short column of silica gel with hexane/EtOAc. A mixture of **S8**, PCC (2.22 g, 10.3 mmol), and Celite (5.22 g) in  $\text{CH}_2\text{Cl}_2$  (20 mL) was stirred



at rt for 2 h and filtered through a pad of Celite. The product was purified by chromatography on silica gel to afford ketone **S9** (983 mg, 57% yield from **S1**):  $^1\text{H}$  NMR (300 MHz,  $\text{CDCl}_3$ )  $\delta$  0.91 (t,  $J = 7.0$  Hz, 3 H), 1.24–1.44 (m, 4 H), 1.55–1.63 (m, 2 H), 2.36 (t,  $J = 7.0$  Hz, 2 H), 2.87 (ddd,  $J = 8.4, 6.8, 2.0$  Hz, 2 H), 2.93–3.02 (m, 2 H), 7.17–7.37 (m, 5 H). A mixture of  $\text{RuCl}[(1S,2S)\text{-TsDPEN}](p\text{-cymene})$  (80.3 mg, 0.126 mmol) and KOH (25.4 mg, 0.453 mmol) in  $\text{CH}_2\text{Cl}_2$  (1 mL) was stirred at rt for 5 min to afford the purple catalyst, which was mixed with ketone **S9** (914.5 mg, 4.01 mmol) in *i*-PrOH (20 mL). The solution was stirred at rt for 20 h to produce alcohol (*S*)-**S8** (803.3 mg, 87% yield) after chromatography on silica gel:  $^1\text{H}$  NMR (300 MHz,  $\text{CDCl}_3$ )  $\delta$  0.91 (t,  $J = 7.2$  Hz, 3 H), 1.22–1.44 (m, 4 H), 1.48–1.60 (m, 2 H), 1.73 (d,  $J = 5.4$  Hz, 1 H), 1.96–2.09 (m, 2 H), 2.23 (dt,  $J = 2.1, 7.2$  Hz, 2 H), 2.79 (t,  $J = 7.8$  Hz, 2 H), 4.34–4.43 (m, 1 H), 7.17–7.37 (m, 5 H).

Diethyl chlorophosphate (1.00 mL, 6.90 mmol) was added to an ice-cold solution of alcohol (*S*)-**S8** (803.3 mg, 3.49 mmol) and *N*-methylimidazole (0.84 mL, 10.5 mmol) in  $\text{CH}_2\text{Cl}_2$  (7 mL). The solution was stirred at rt for 14 h and poured into saturated  $\text{NaHCO}_3$ . The crude product was purified by chromatography on silica gel with hexane/EtOAc to afford phosphate (*S*)-**8** (1.05 g, 82% yield): 95% ee by chiral HPLC analysis (Chiralcel OD-H, hexane/*i*-PrOH (98:2), 0.3 mL/min, 25 °C,  $t_R$ /min = 61.9 (minor) and 64.9 (major));  $^1\text{H}$  NMR (300 MHz,  $\text{CDCl}_3$ )  $\delta$  0.90 (t,  $J = 7.2$  Hz, 3 H), 1.23–1.42 (m, 10 H), 1.44–1.59 (m, 2 H), 2.02–2.20 (m, 2 H), 2.24 (dt,  $J = 2.1, 7.2$  Hz, 2 H), 4.04–4.22 (m, 4 H), 4.97–5.04 (m, 1 H), 7.18–7.37 (m, 5 H). The  $^1\text{H}$  NMR spectrum of (*S*)-**8** was consistent with the reported data.[S1]

## 2. Reference

- S1. Kobayashi, Y.; Takashima, Y.; Motoyama, Y.; Isogawa, Y.; Katagiri, K.; Tsuboi, A.; Ogawa, N. *Chem. Eur. J.* **2021**, *27*, 3779–3785.

### 3. NMR spectra and chiral HPLC

Explanatory notes of HPLC chromatograms and translation of Jpn indication to Engl.

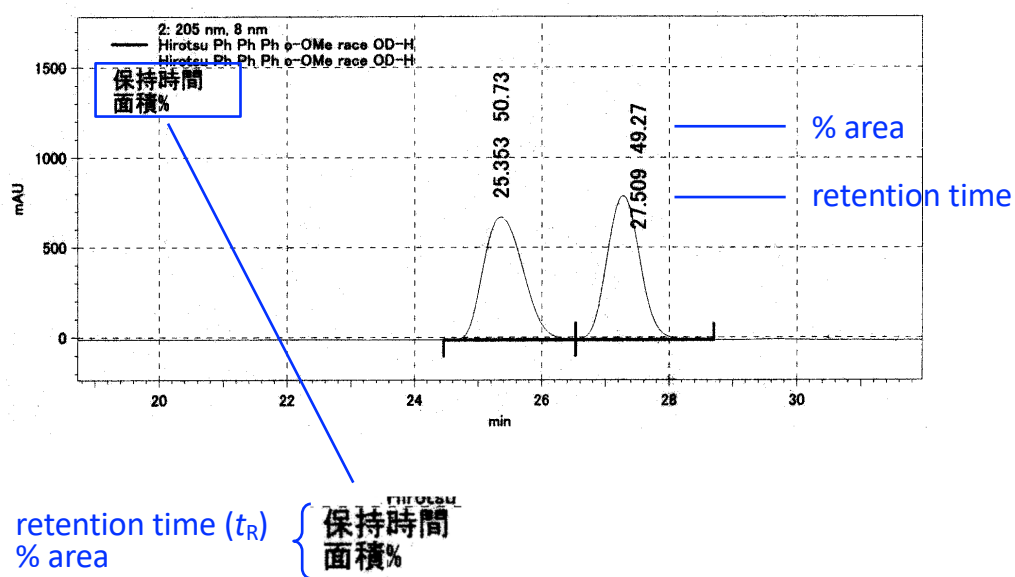

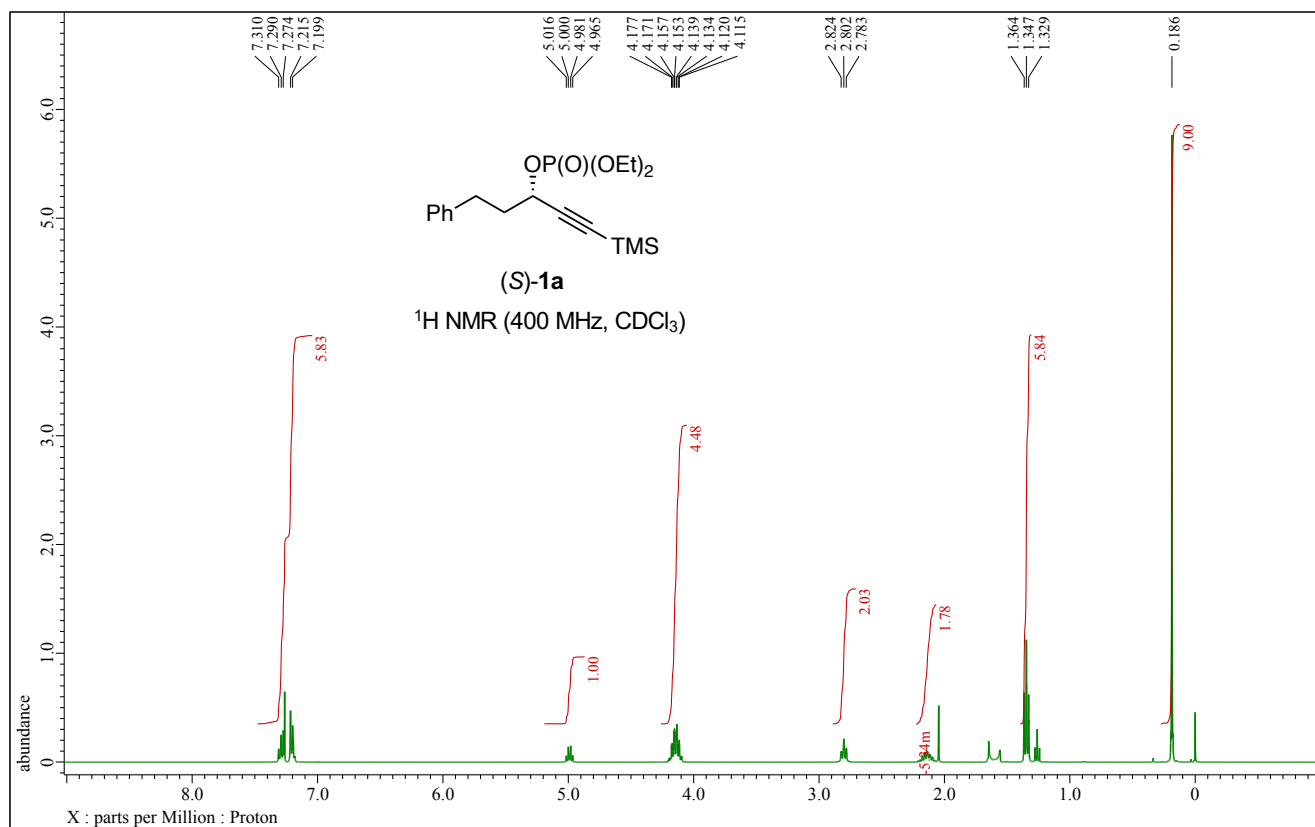

expansion of <sup>1</sup>H NMR

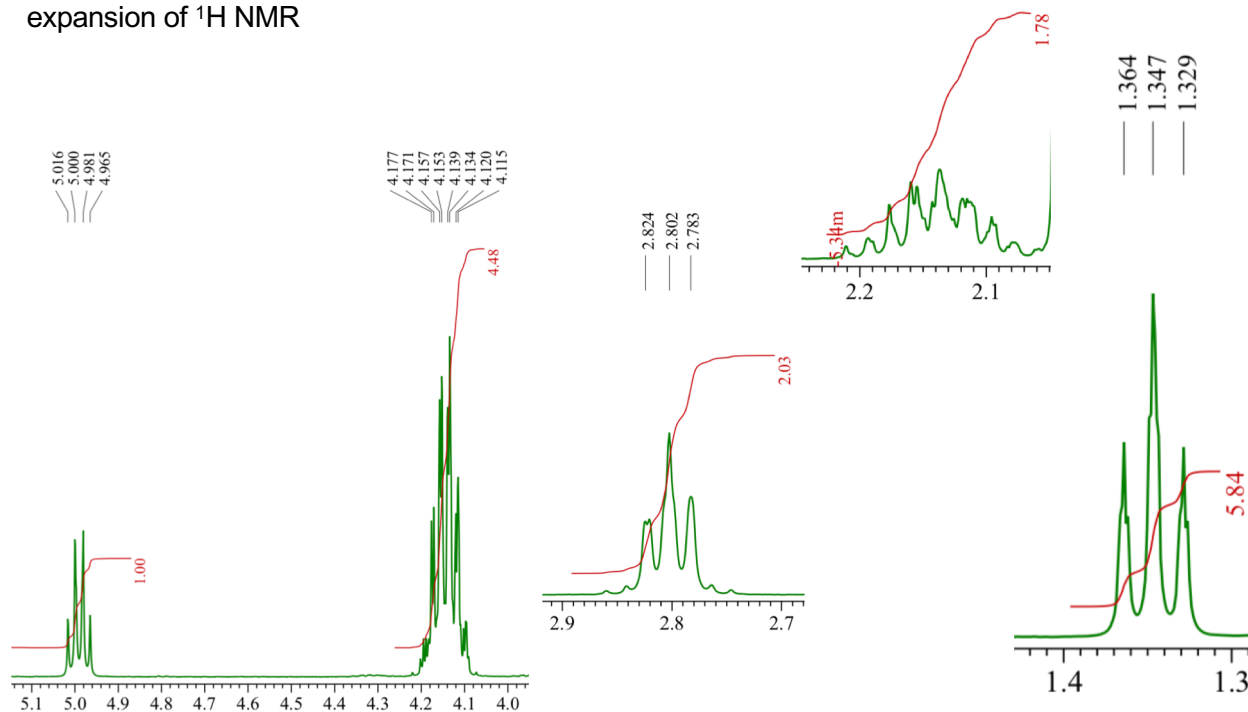

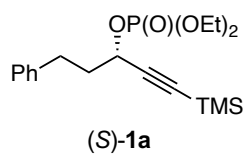

$$\begin{aligned}
 ee &= (1035185 - 13516) \times 100 / (1035185 + 13516) \\
 &= 97.4 \\
 &\approx 97\%
 \end{aligned}$$

Chiralcel OD-H, hexane/*i*-PrOH = 98:2, 0.3 mL/min, 40 °C

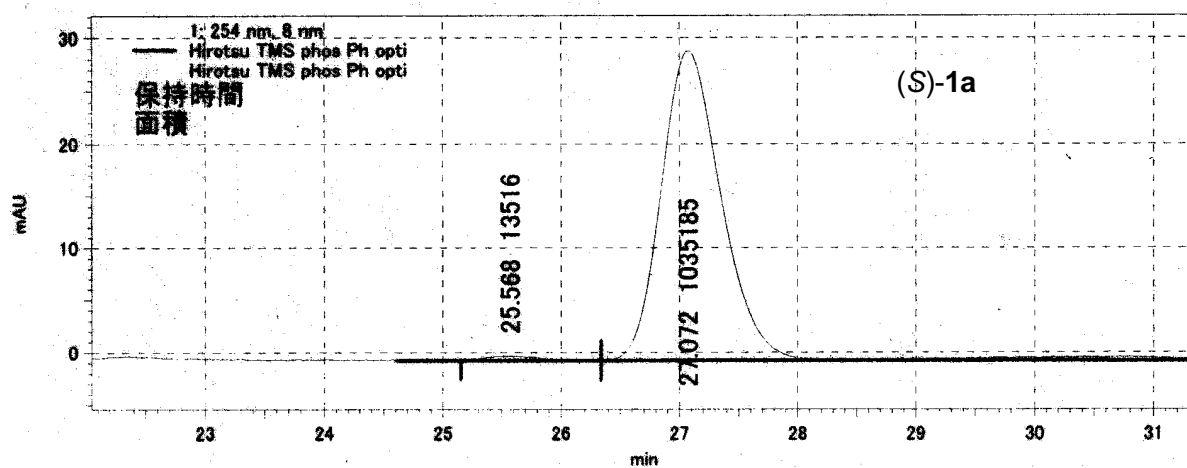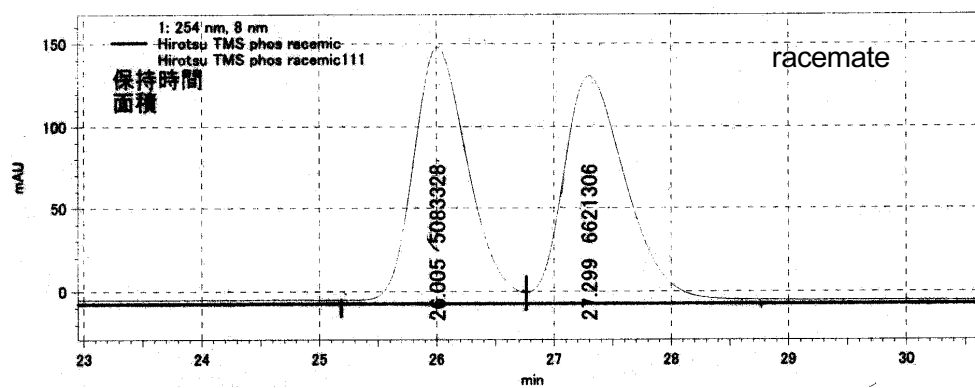

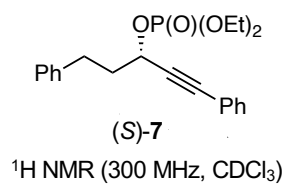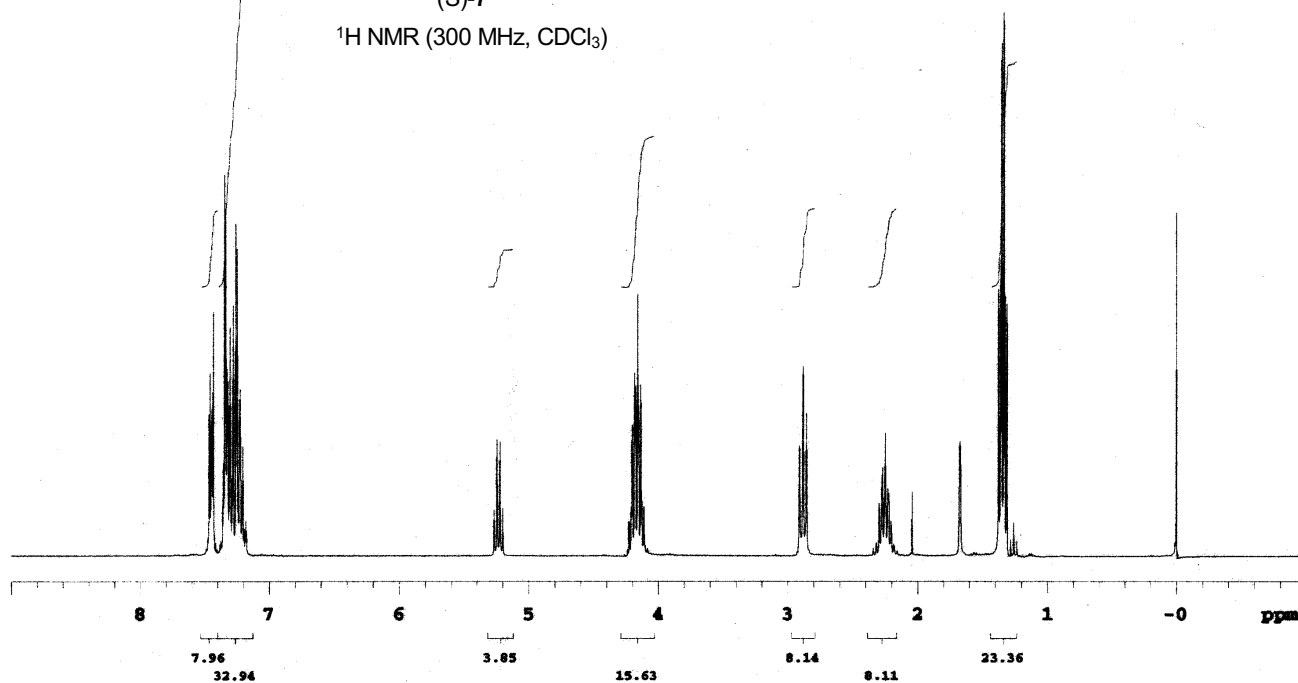

expansion of <sup>1</sup>H NMR

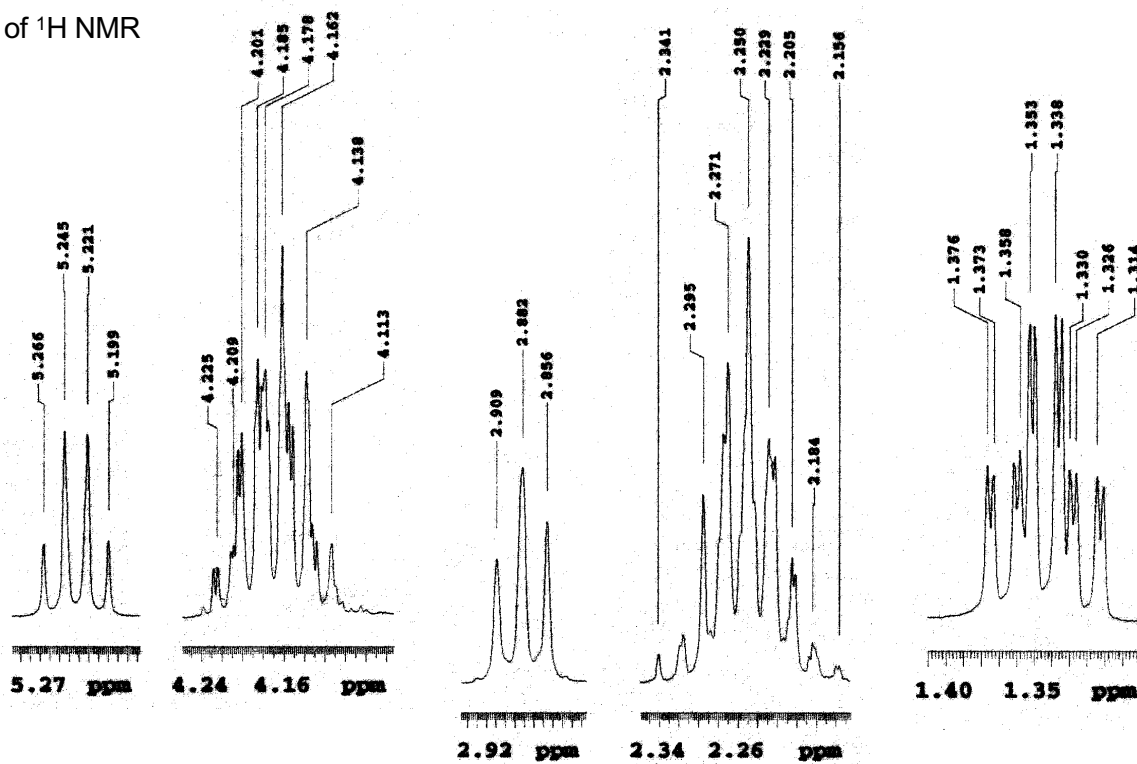

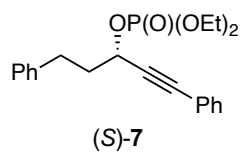

$$ee = (98.00 - 2.00) \times 100 / (98.00 + 2.00) = 96.0$$

Chiralcel OD-H, hexane/*i*-PrOH = 98:2, 0.3 mL/min, 25 °C

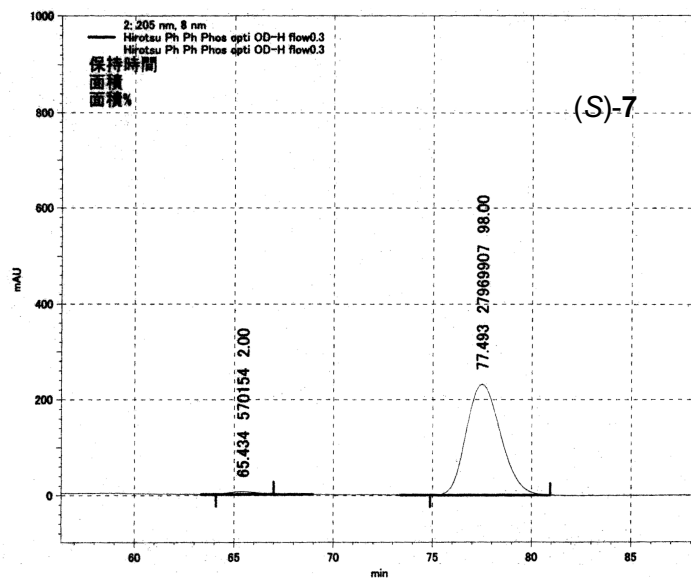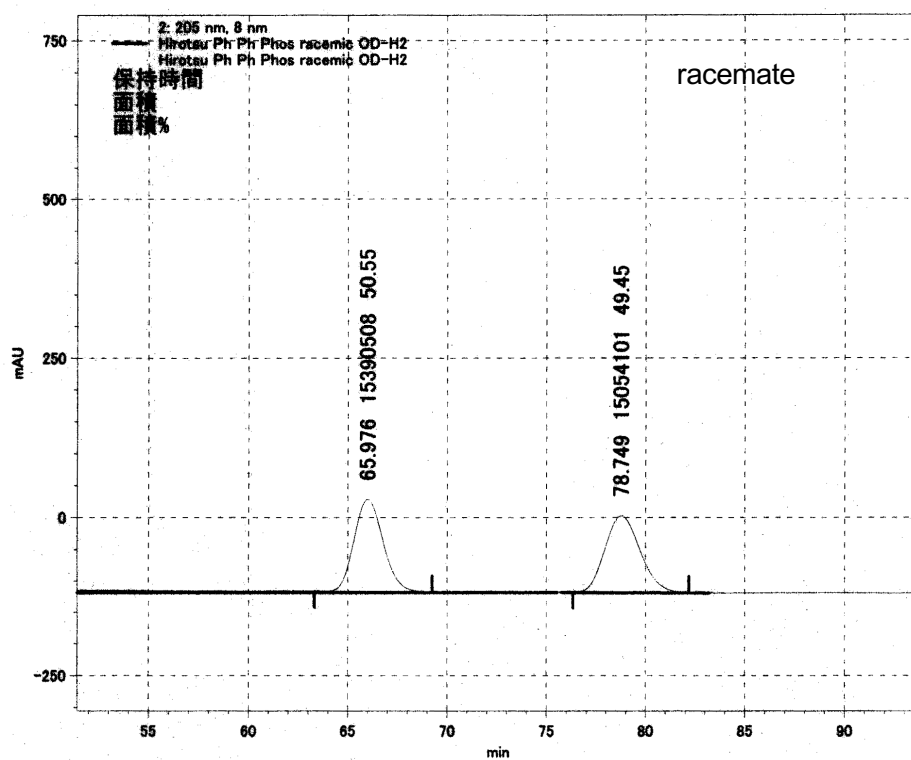

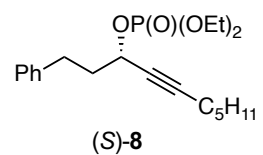

$^1\text{H}$  NMR (300 MHz,  $\text{CDCl}_3$ )

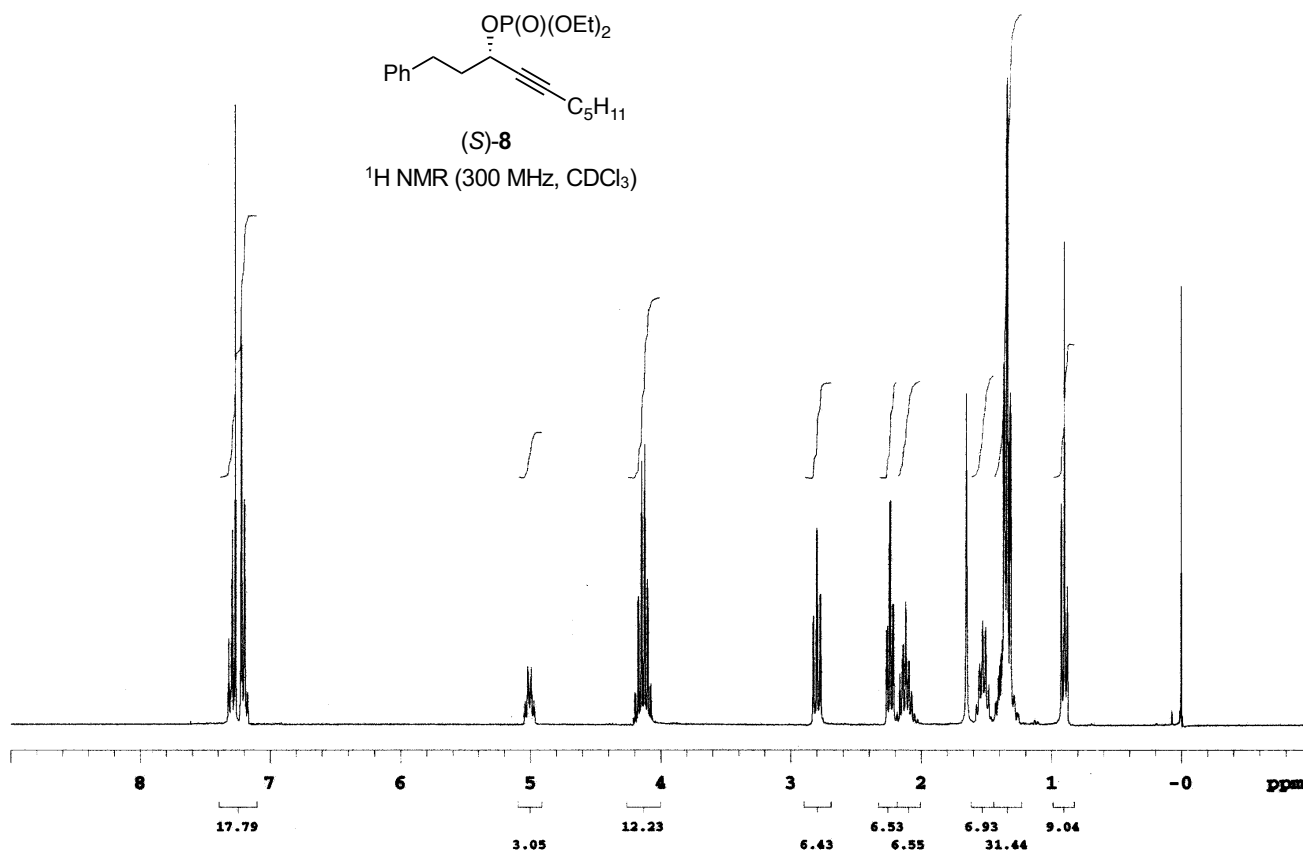

expansion of  $^1\text{H}$  NMR

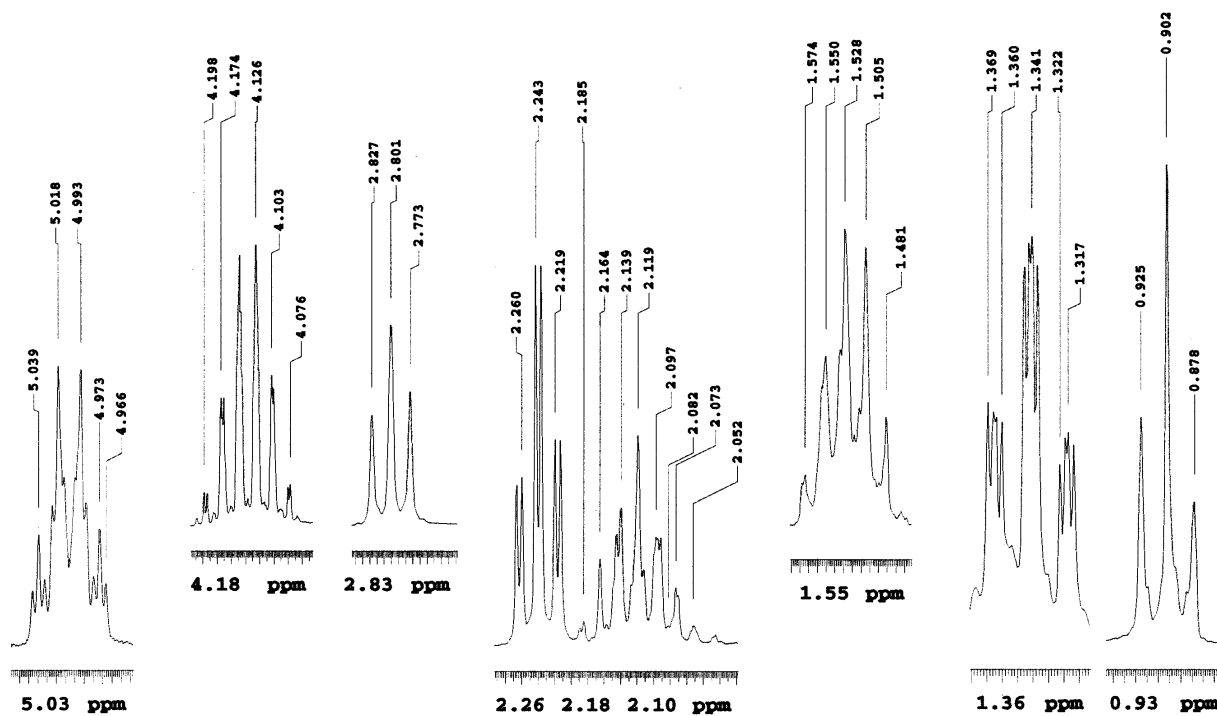

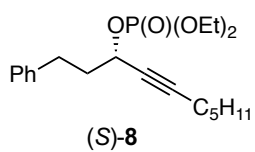

$$\begin{aligned}
 ee &= (97.38 - 2.62) \times 100 / (97.38 + 2.62) \\
 &= 94.76 \\
 &\approx 95\%
 \end{aligned}$$

Chiralcel OD-H, hexane/*i*-PrOH = 98:2, 0.3 mL/min, 25 °C

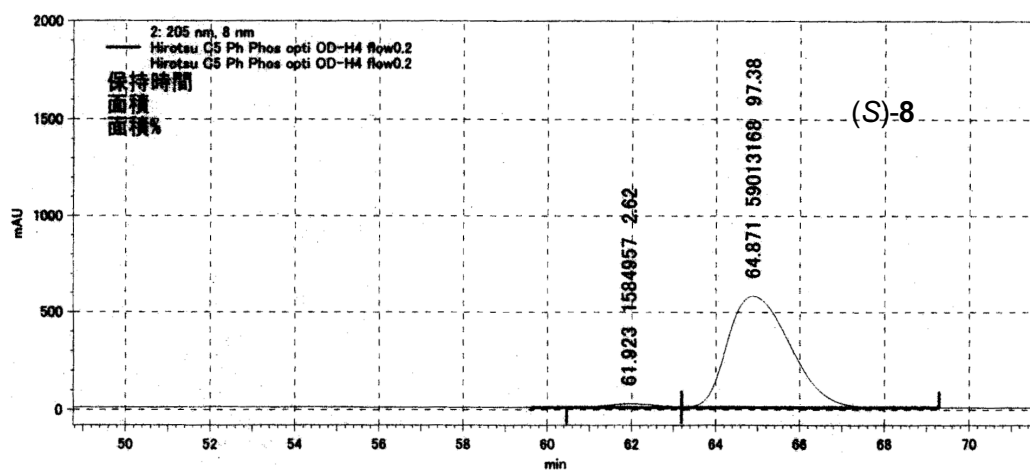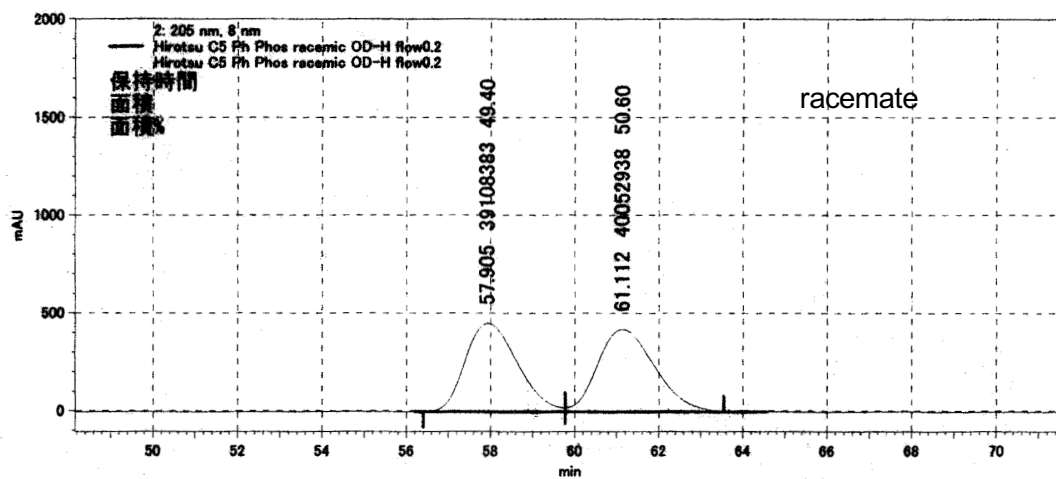



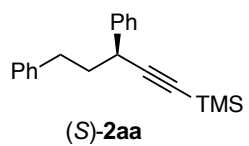

$^1\text{H}$  NMR (300 MHz,  $\text{CDCl}_3$ )

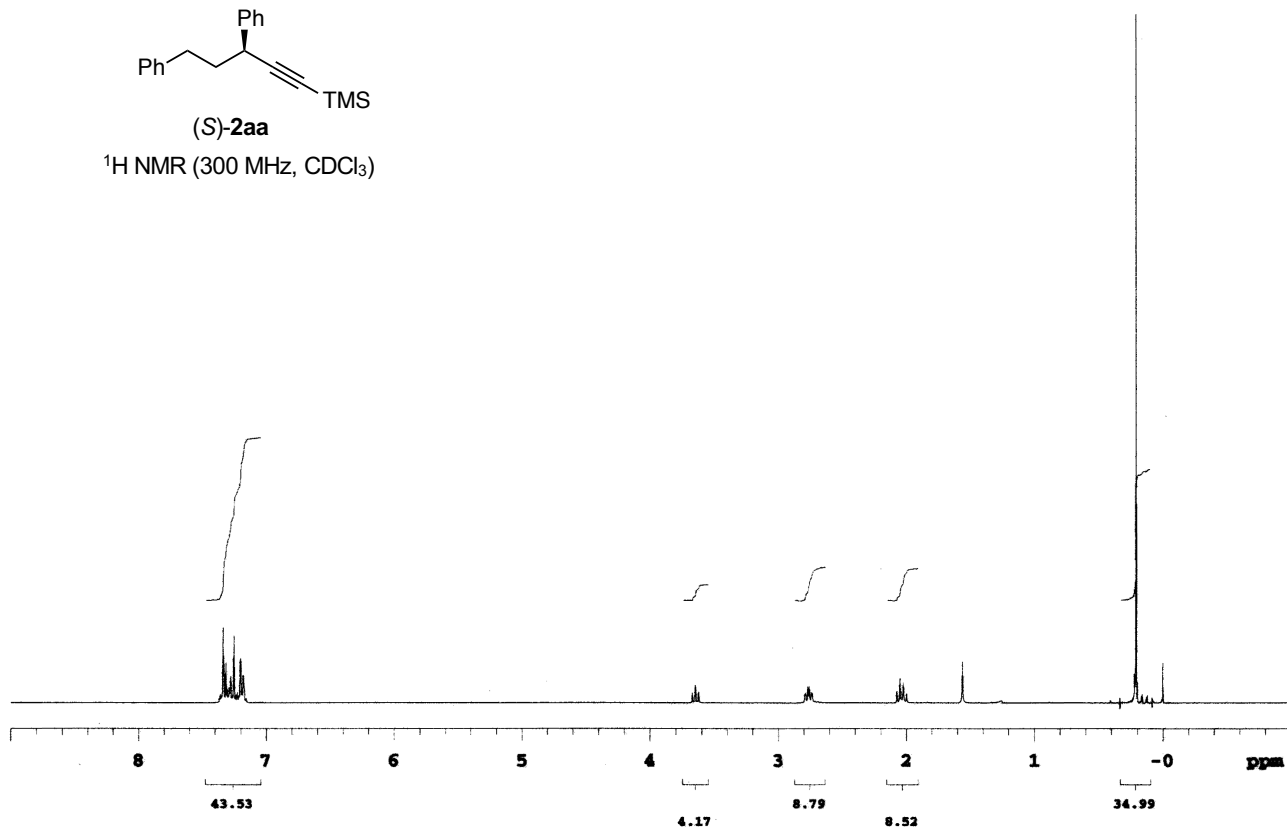

expansion of  $^1\text{H}$  NMR

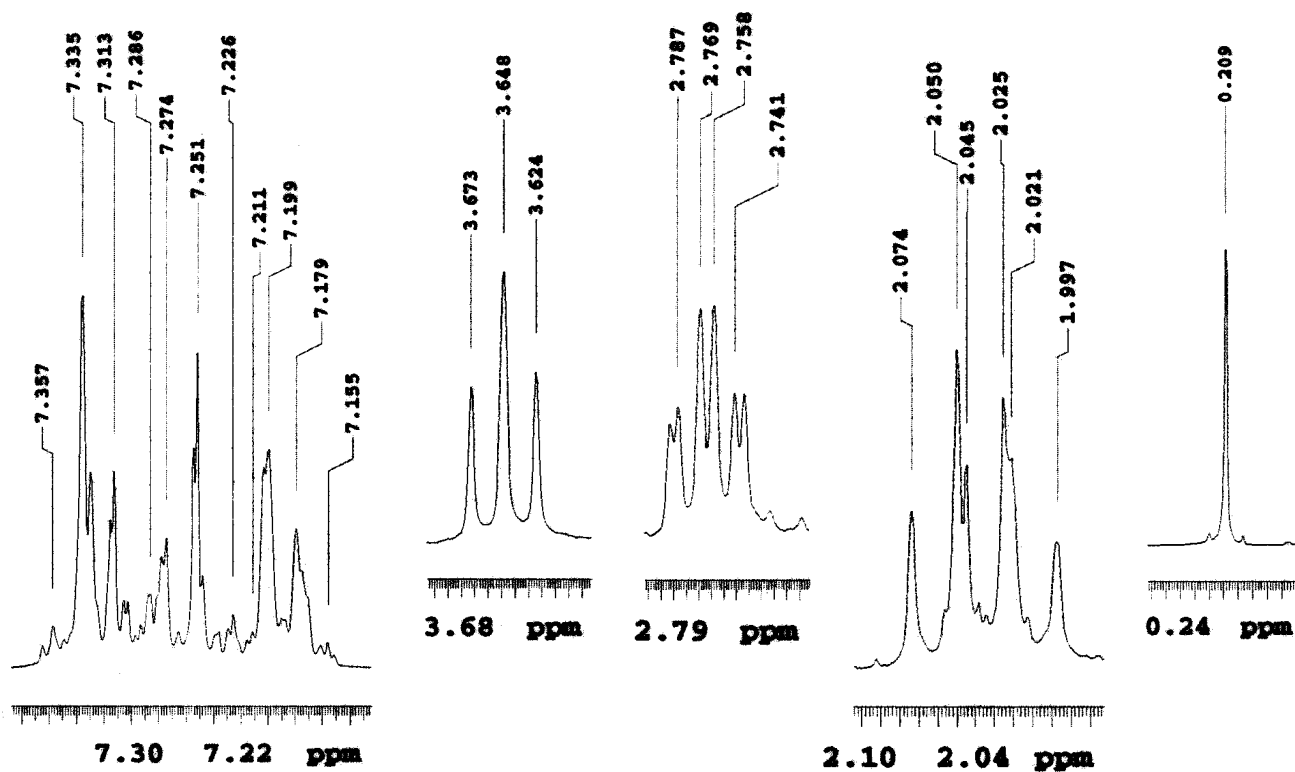

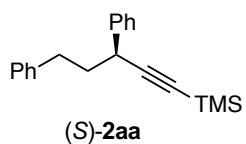

$^{13}\text{C}$  NMR (75 MHz,  $\text{CDCl}_3$ )

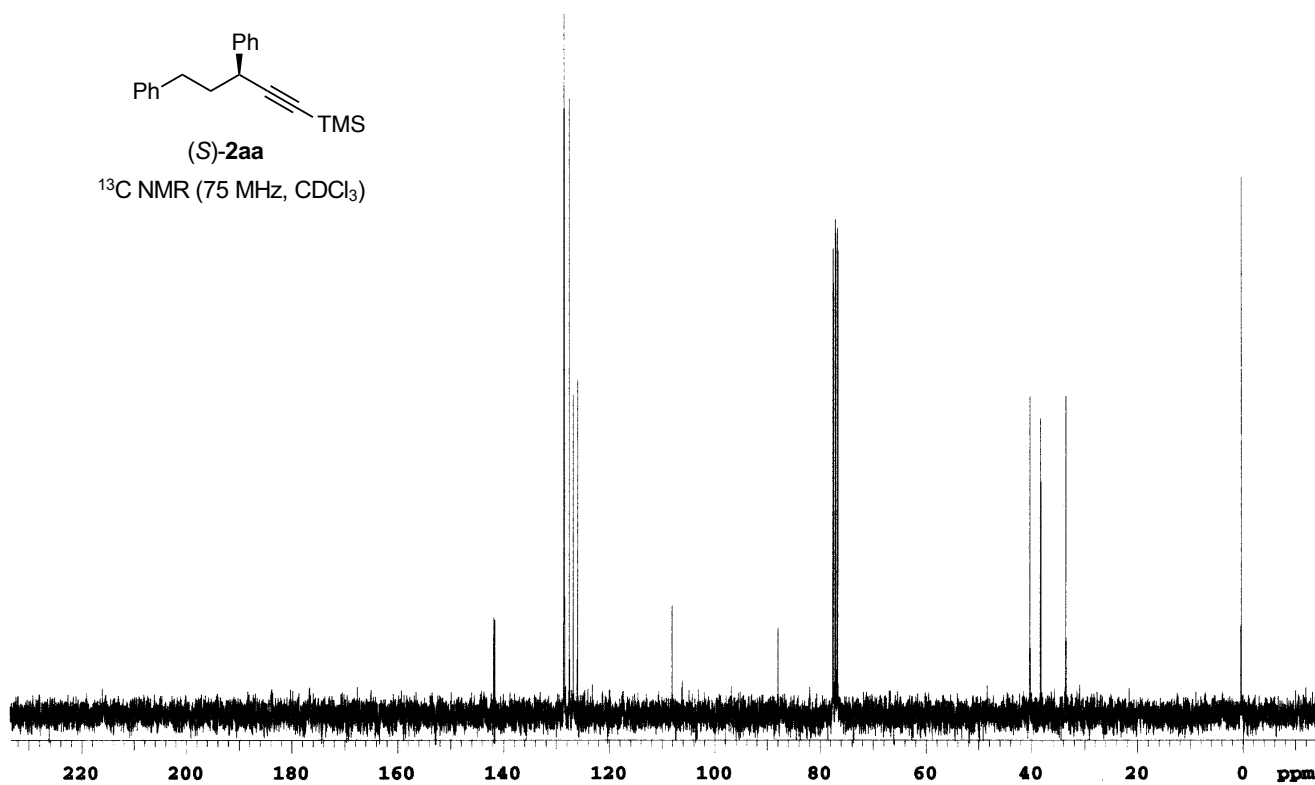

Expansion of  $^{13}\text{C}$ -APT NMR

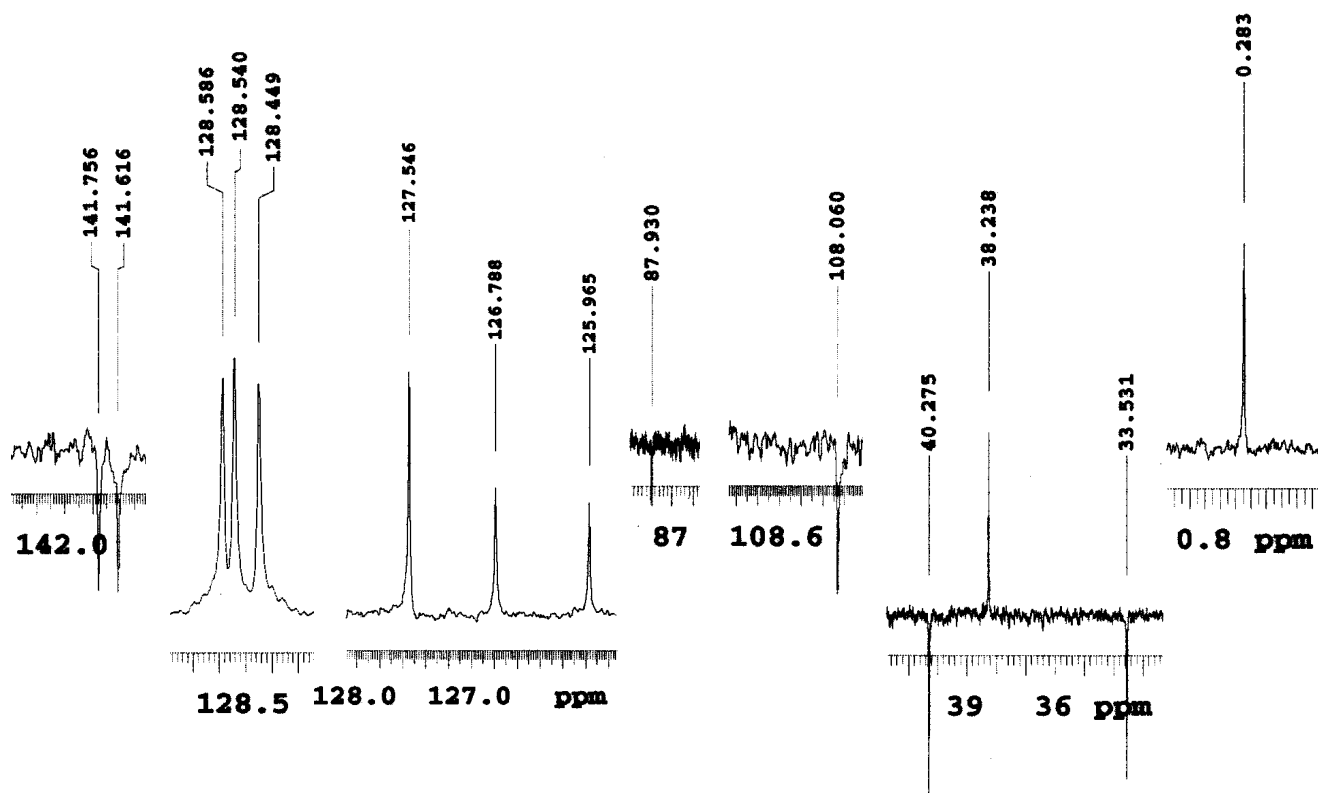

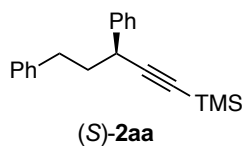

$$\begin{aligned}
 ee &= (98.36 - 1.64) \times 100 / (98.36 + 1.64) \\
 &= 96.72 \\
 &\approx 97\%
 \end{aligned}$$

$$\begin{aligned}
 es &= 97 \times 100 / 98 = 99\%
 \end{aligned}$$

Chiralcel OJ-H, hexane/*i*-PrOH = 99.9:0.1, 0.2 mL/min, 25 °C

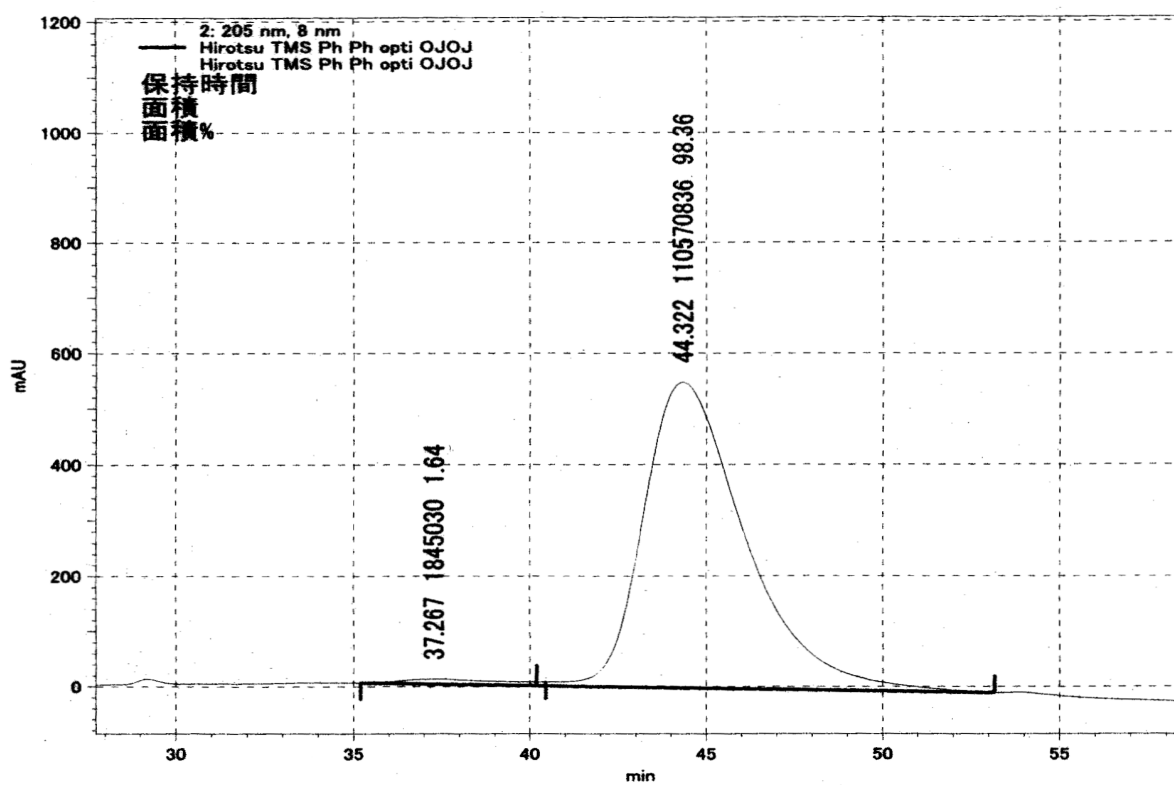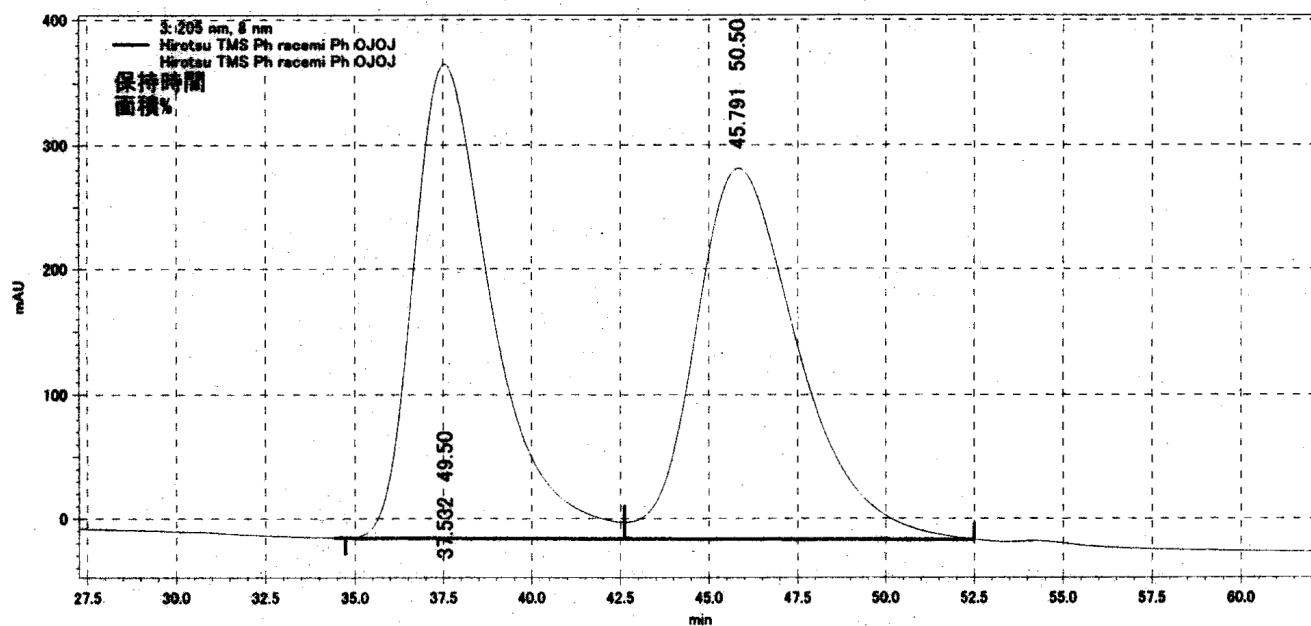

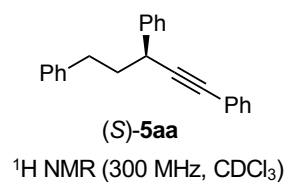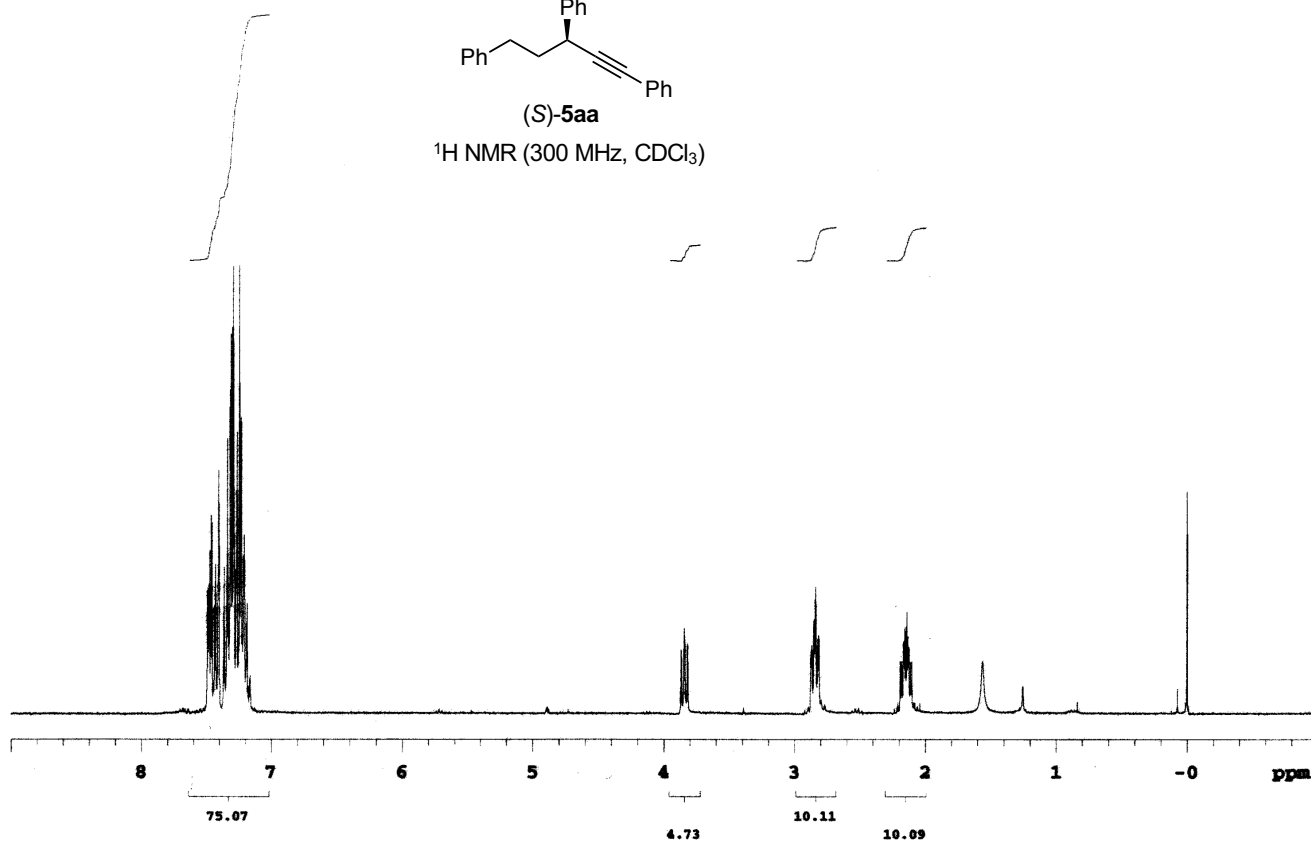

expansion of <sup>1</sup>H NMR

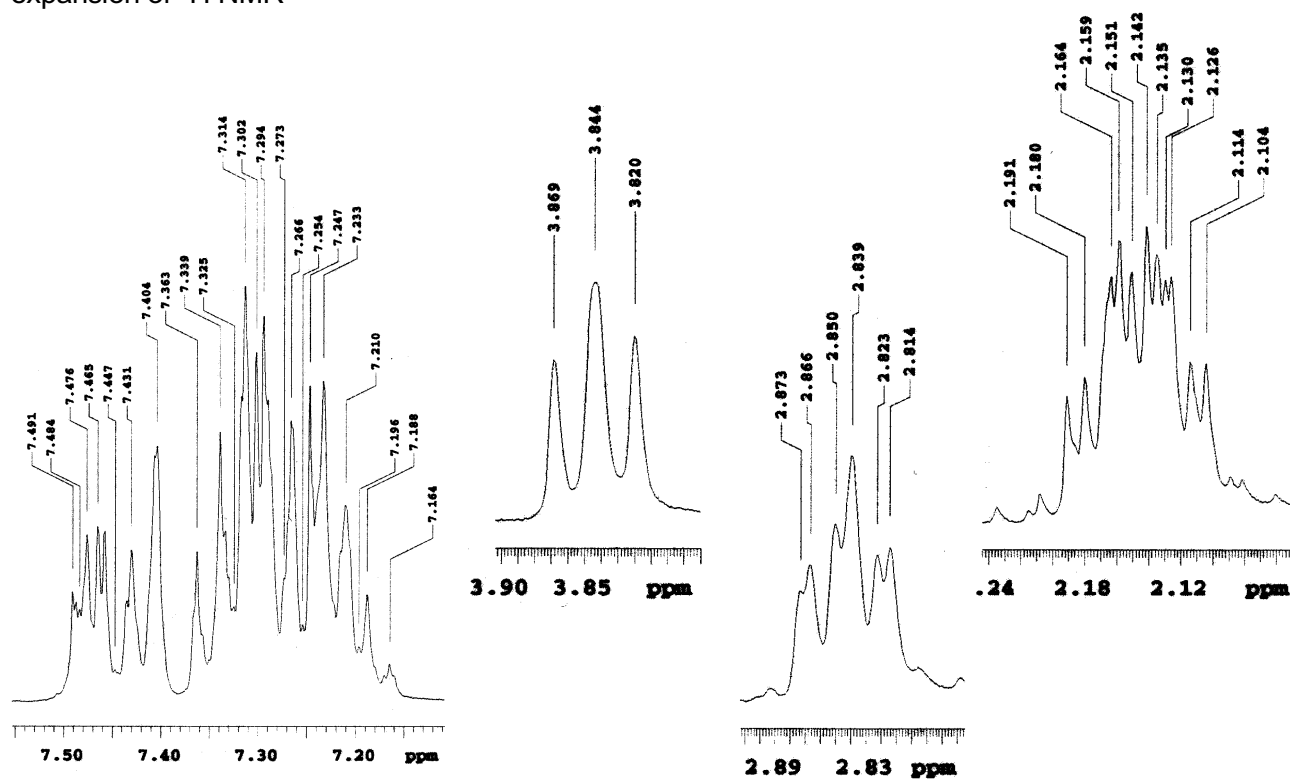

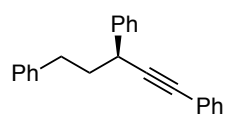

(S)-5aa

$^{13}\text{C}$  NMR (75 MHz,  $\text{CDCl}_3$ )

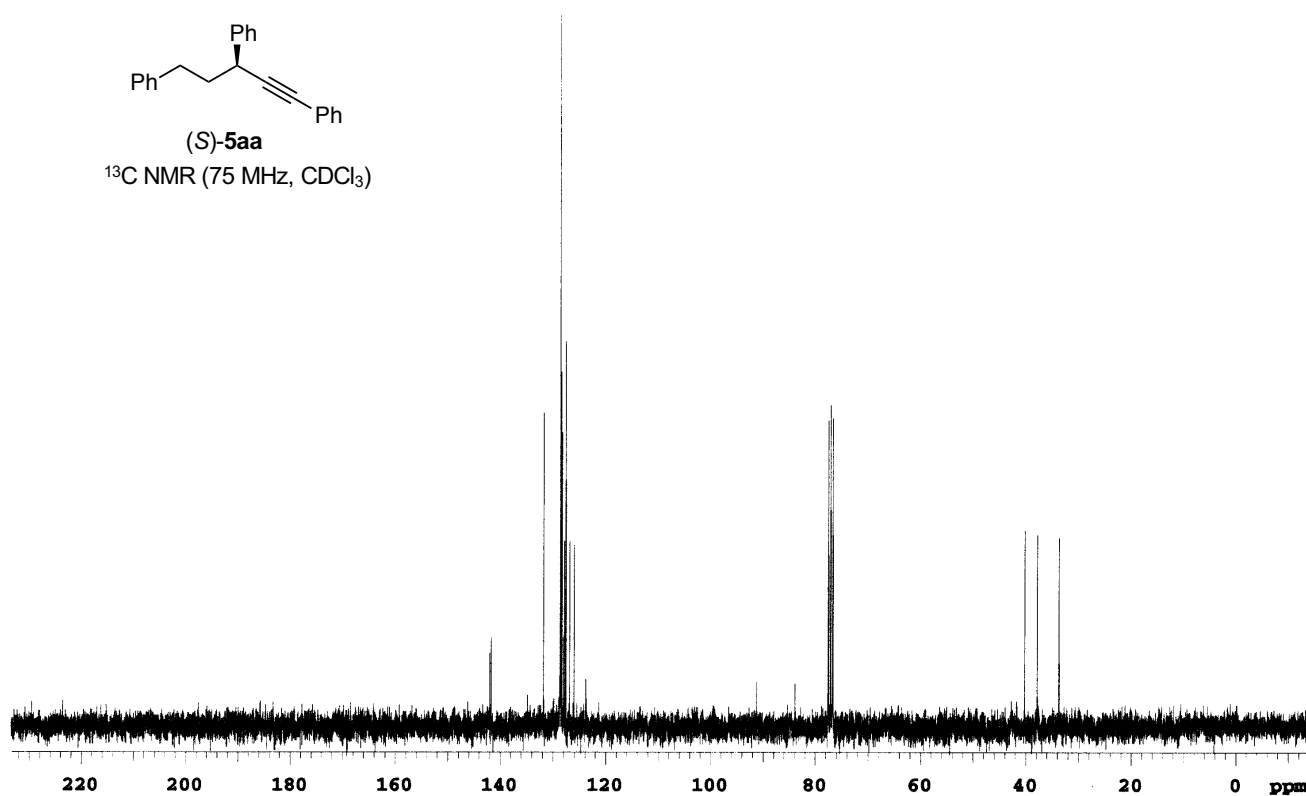

Expansion of  $^{13}\text{C}$ -APT NMR

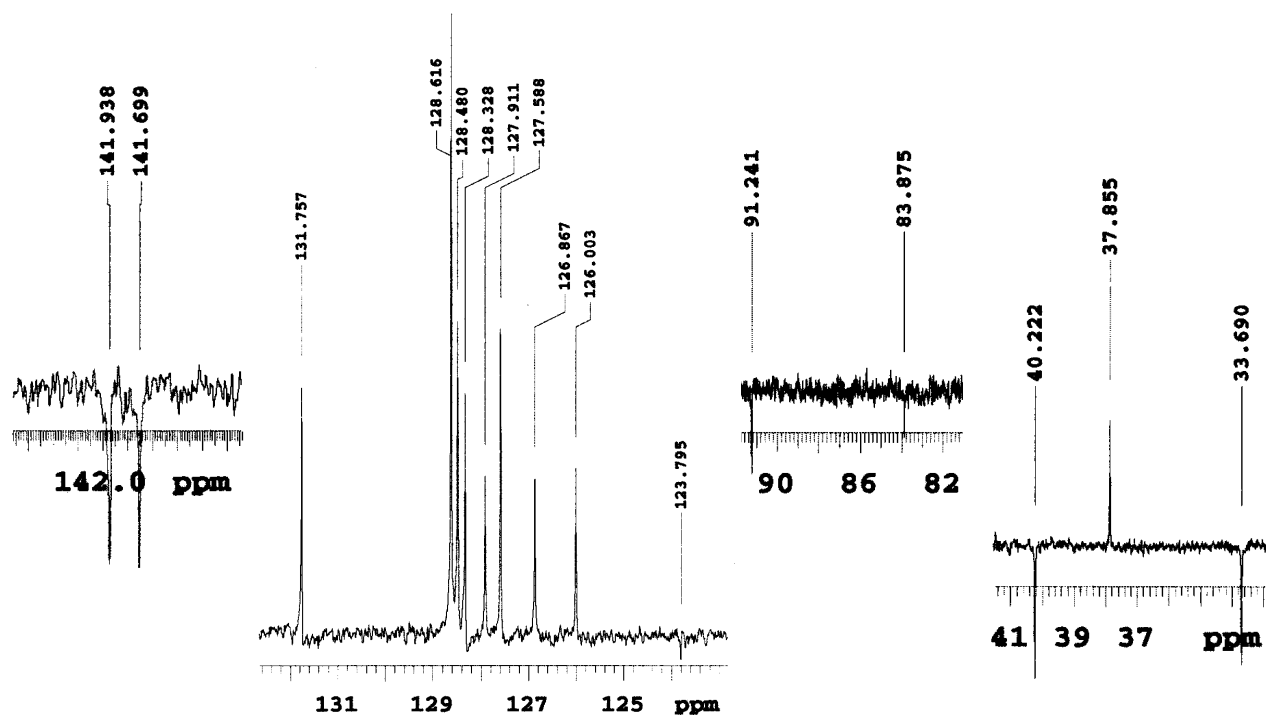

$^1\text{H}$  NMR (300 MHz,  $\text{CDCl}_3$ ) of crude **2aa**  
 Table 1, Entry 7 (Method A)

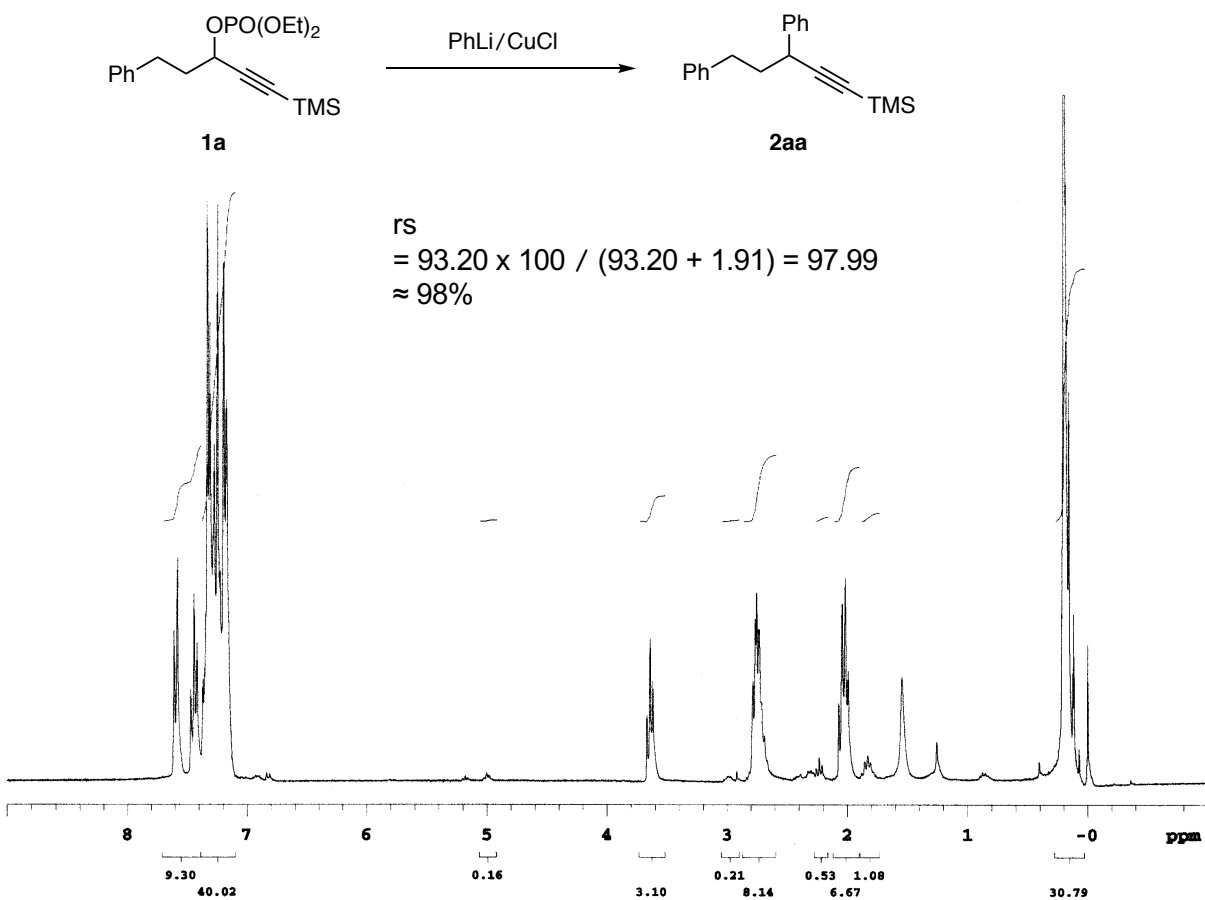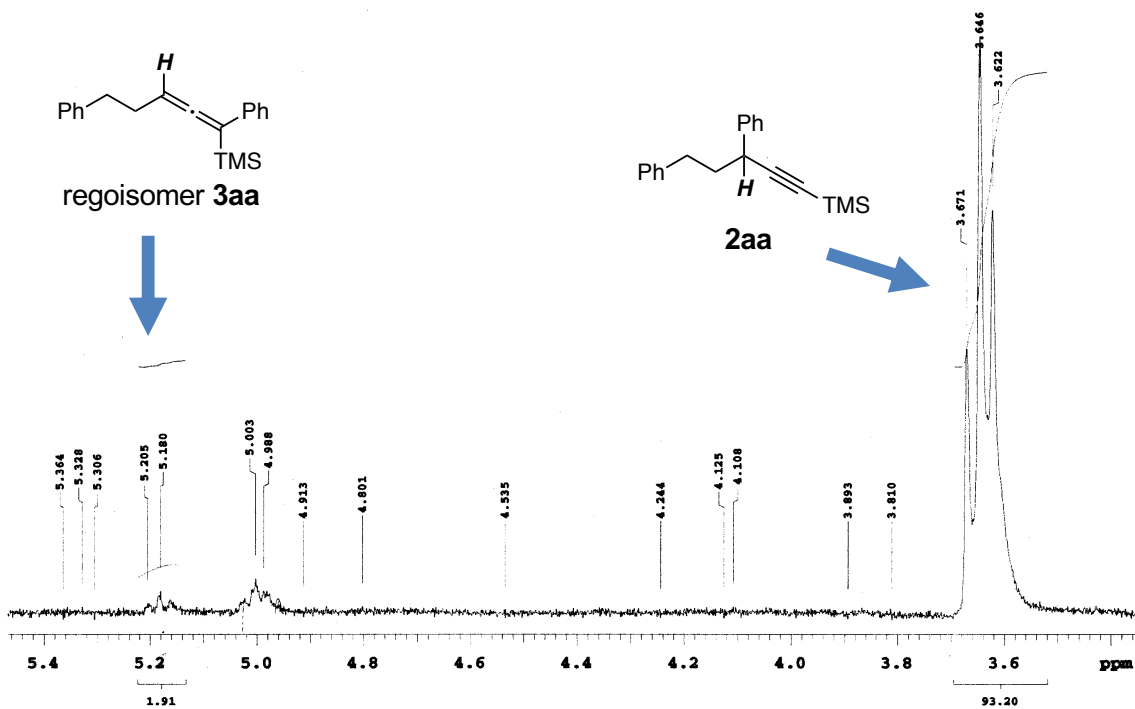

$^1\text{H}$  NMR (300 MHz,  $\text{CDCl}_3$ ) of crude **2aa**  
 Table 1, Entry 8 (Method B)

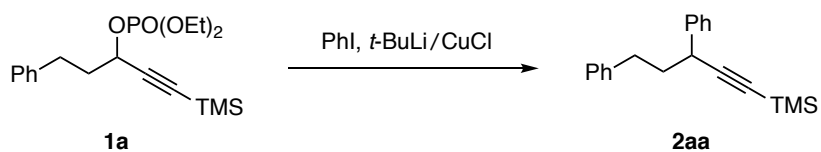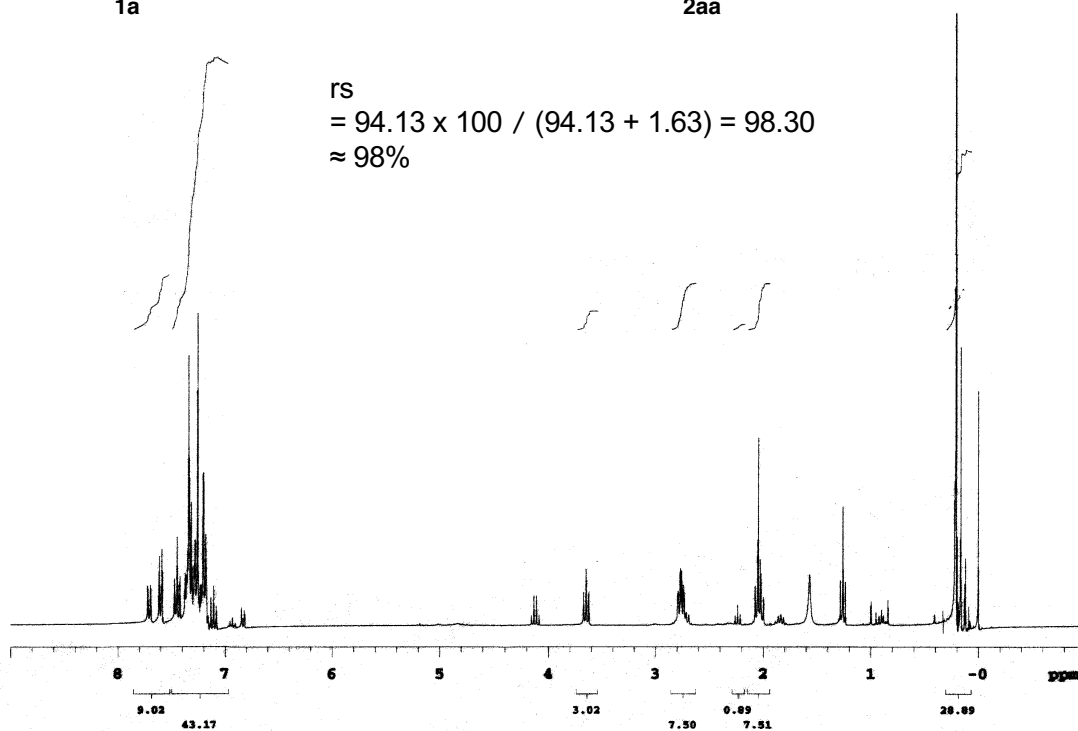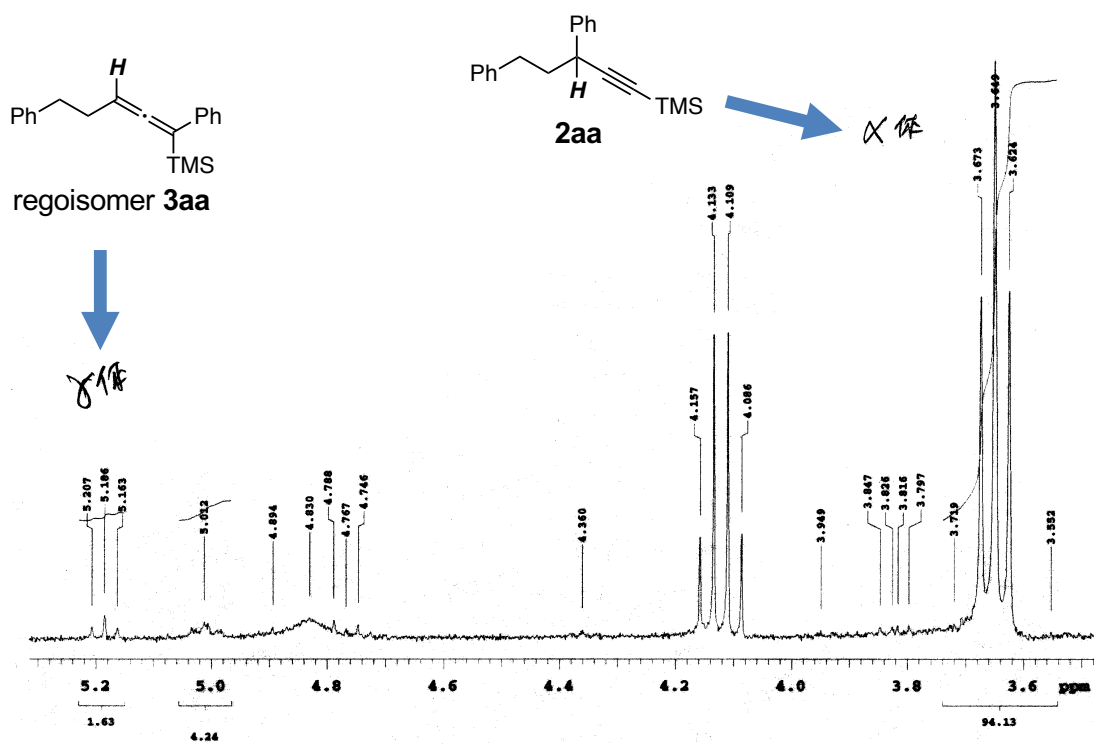

<sup>1</sup>H NMR (300 MHz, CDCl<sub>3</sub>) of crude **2aa**  
Table 1, Entry 9 (Method C)

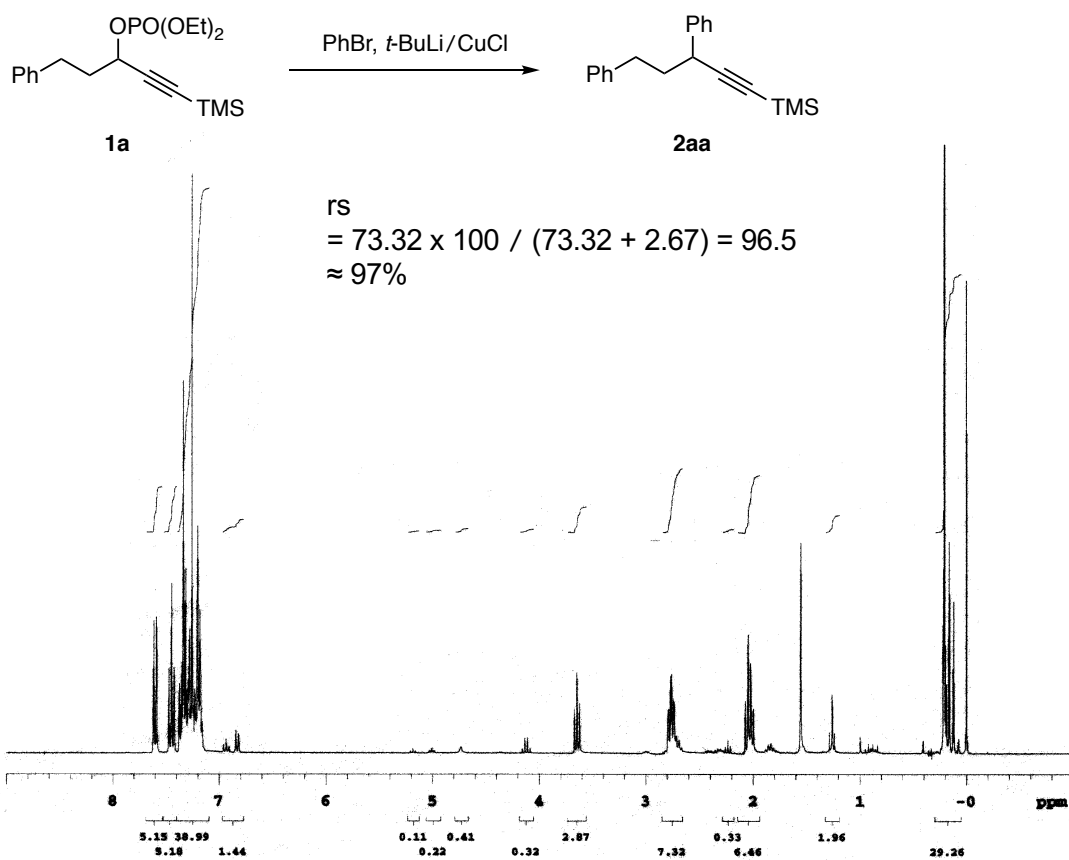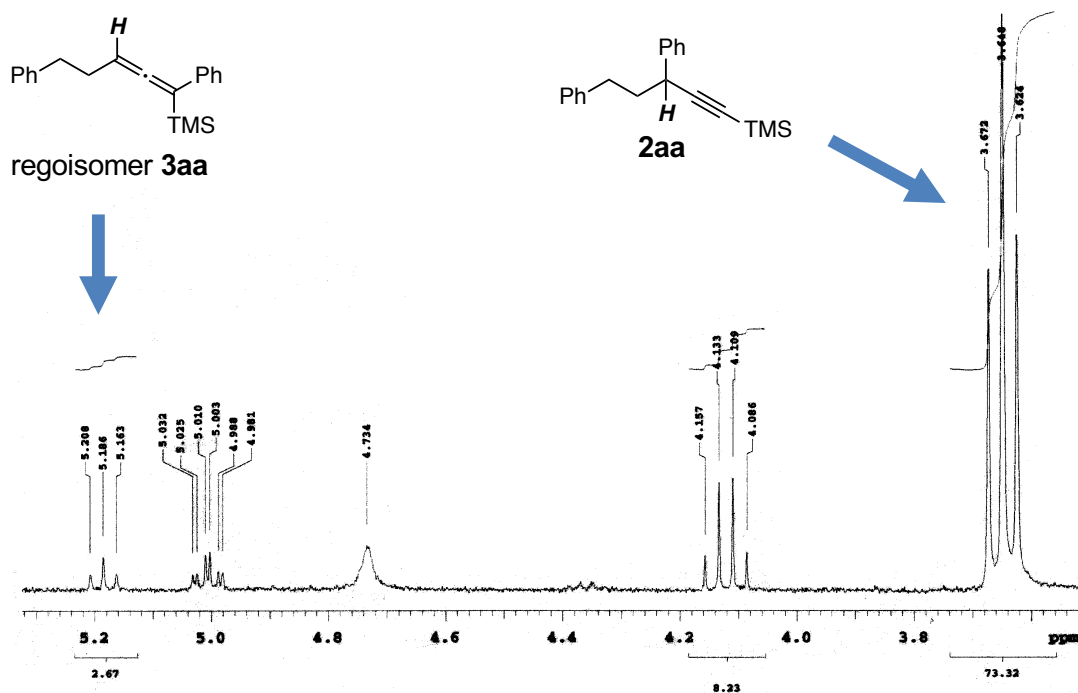



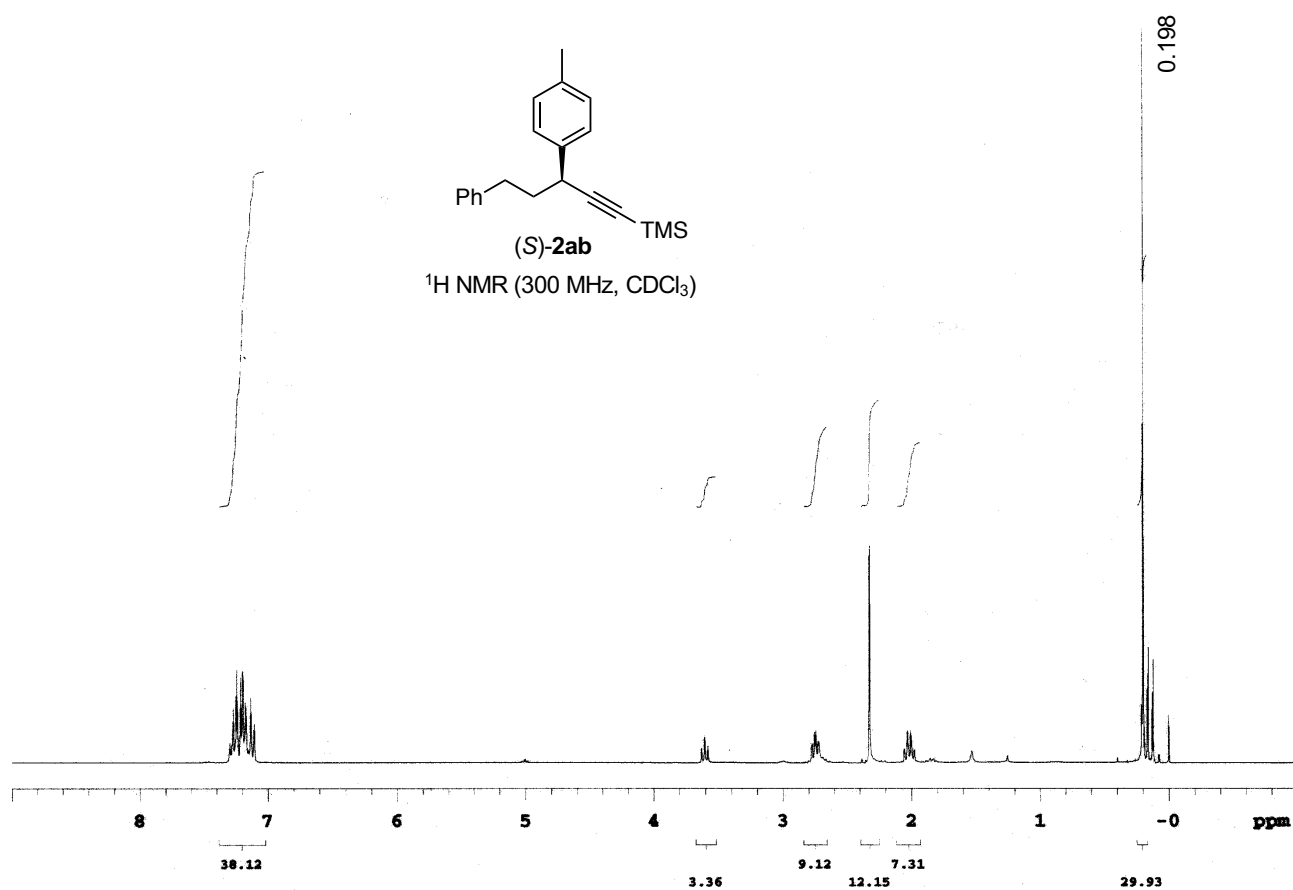

expansion of <sup>1</sup>H NMR

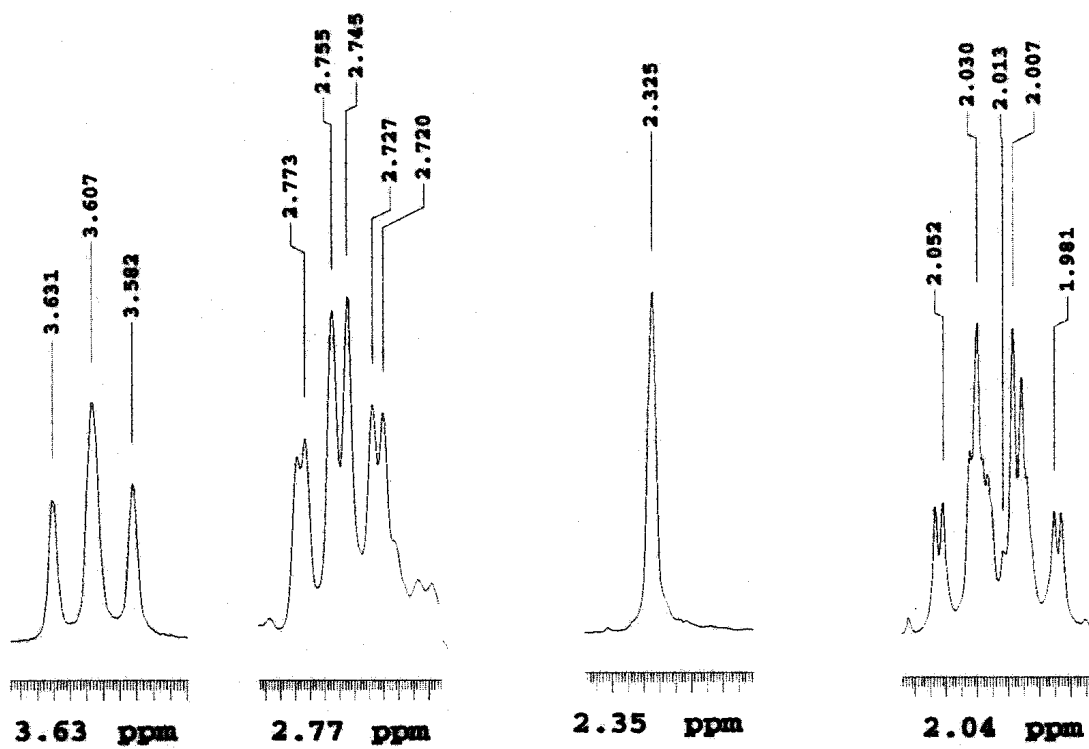

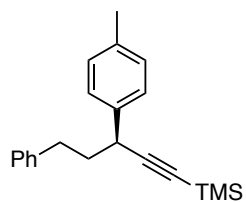

(S)-2ab

$^{13}\text{C}$  NMR (75 MHz,  $\text{CDCl}_3$ )

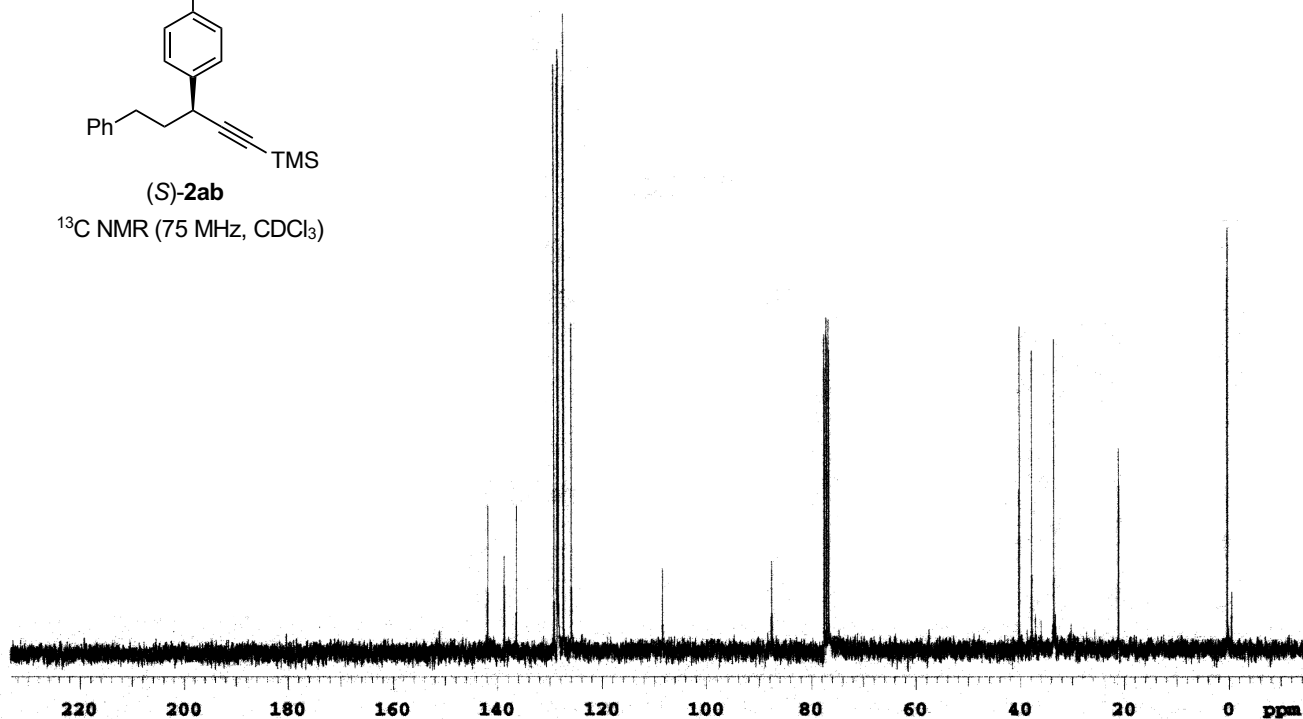

Expansion of  $^{13}\text{C}$ -APT NMR

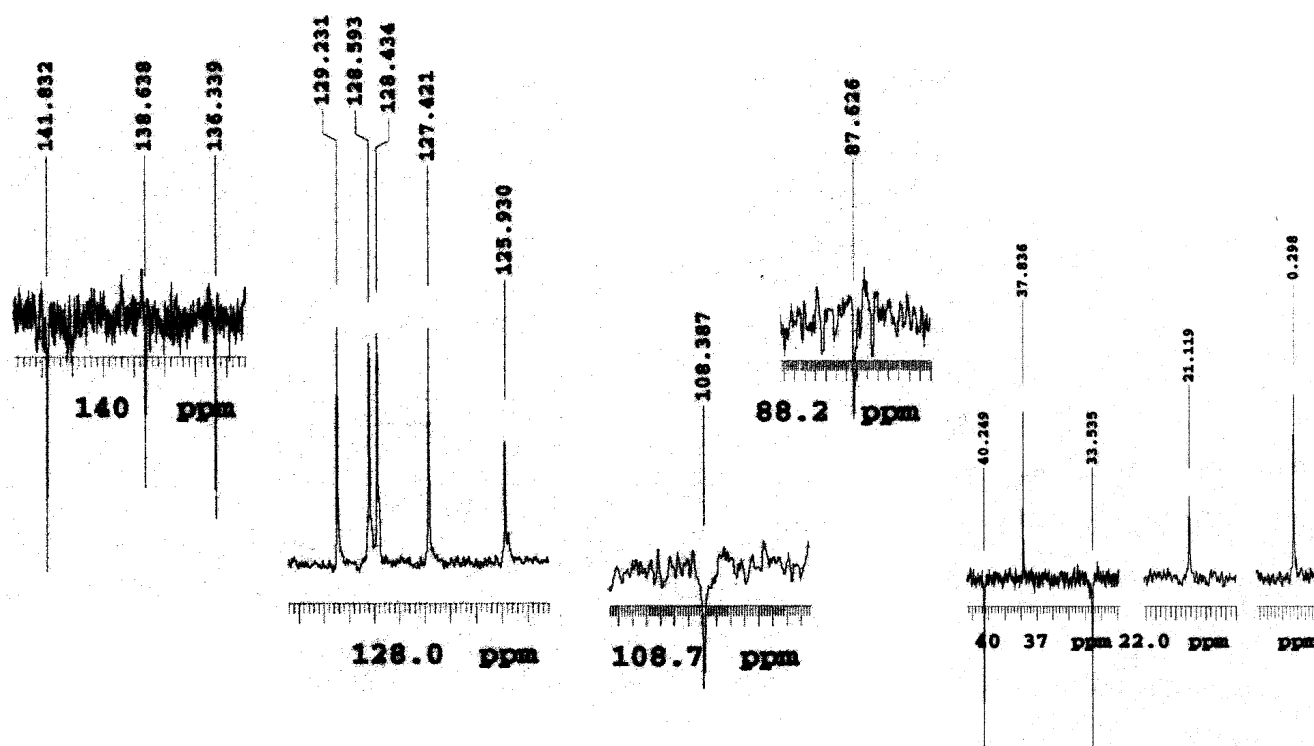

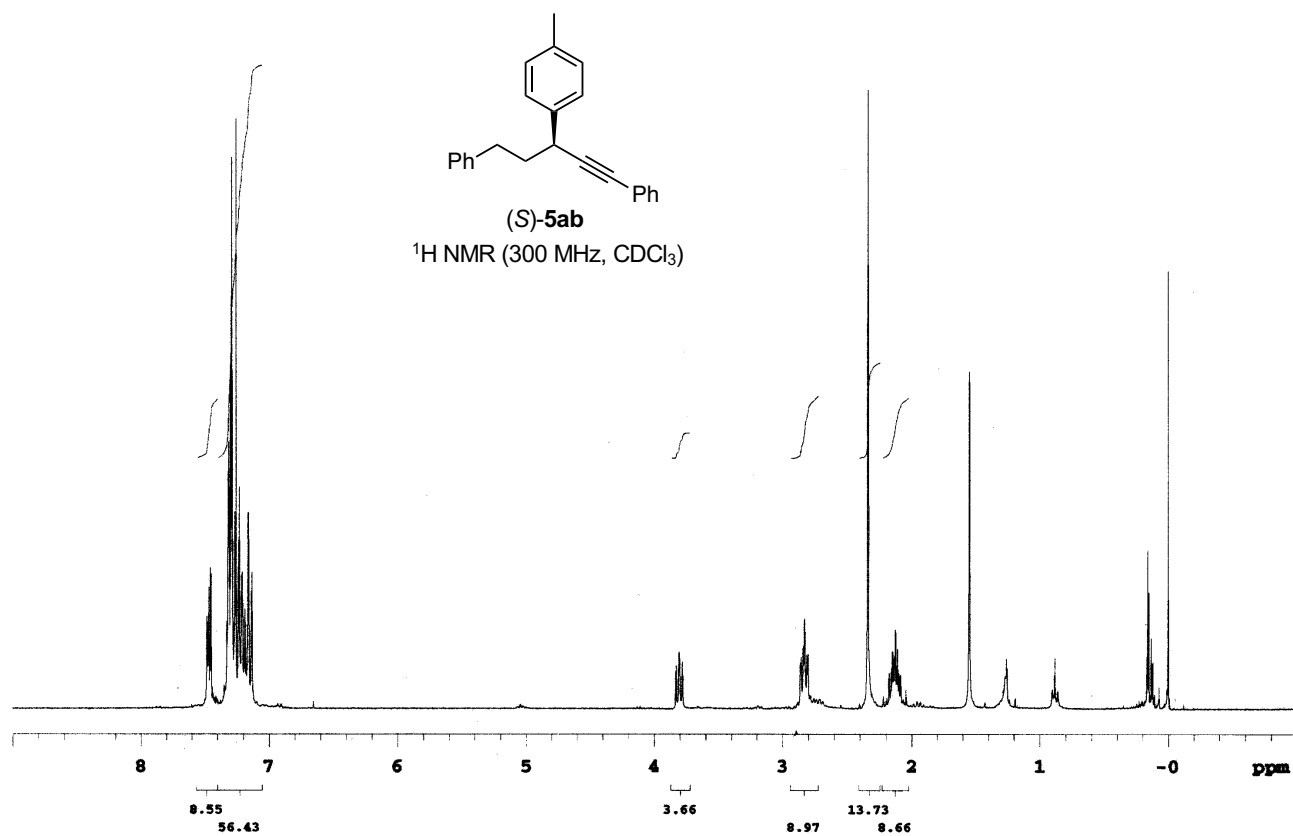

expansion of <sup>1</sup>H NMR

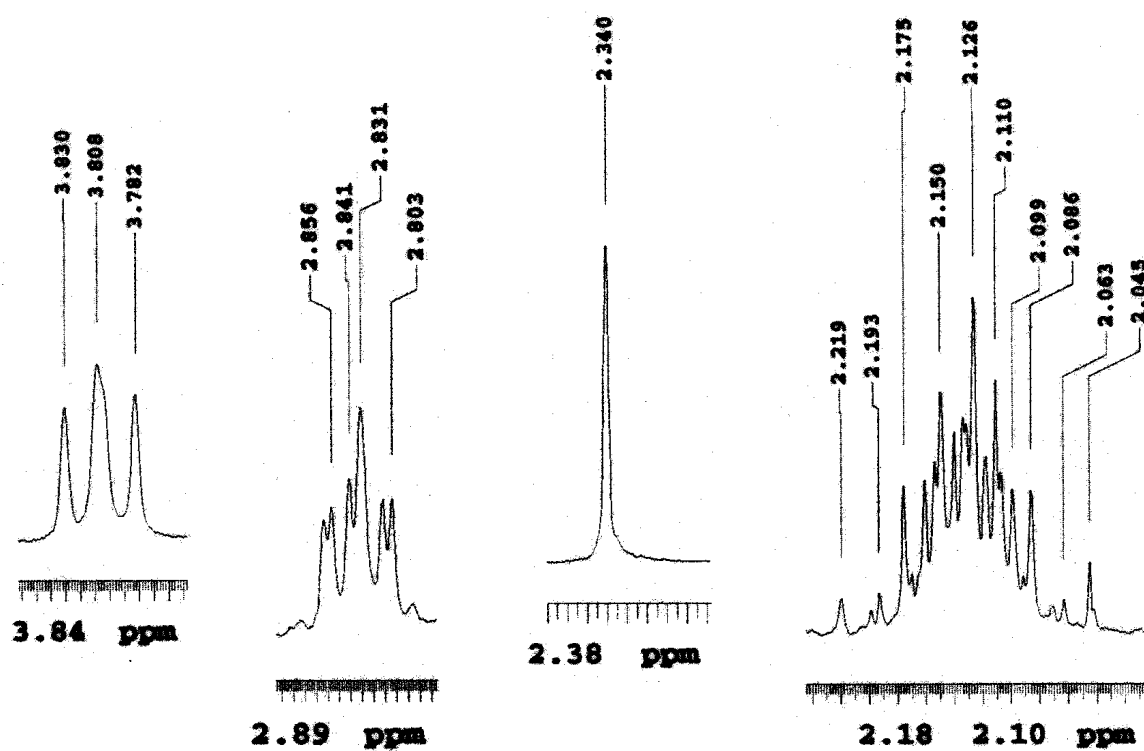

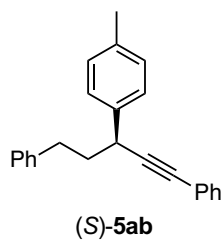

$$ee = \frac{(97.82 - 2.18) \times 100}{(97.82 + 2.18)} = 96.0\%$$

$$es = \frac{96 \times 100}{98} = 98\%$$

Chiralcel OD-H, hexane/*i*-PrOH = 99.8:0.2, 0.3 mL/min, 25 °C

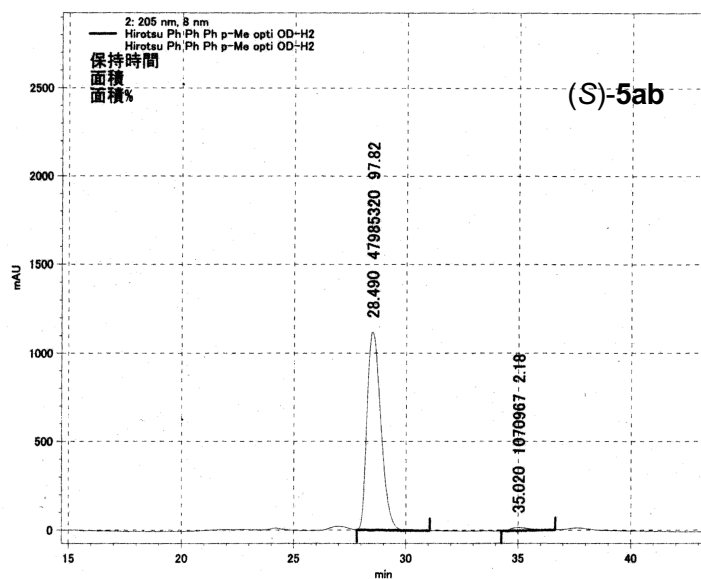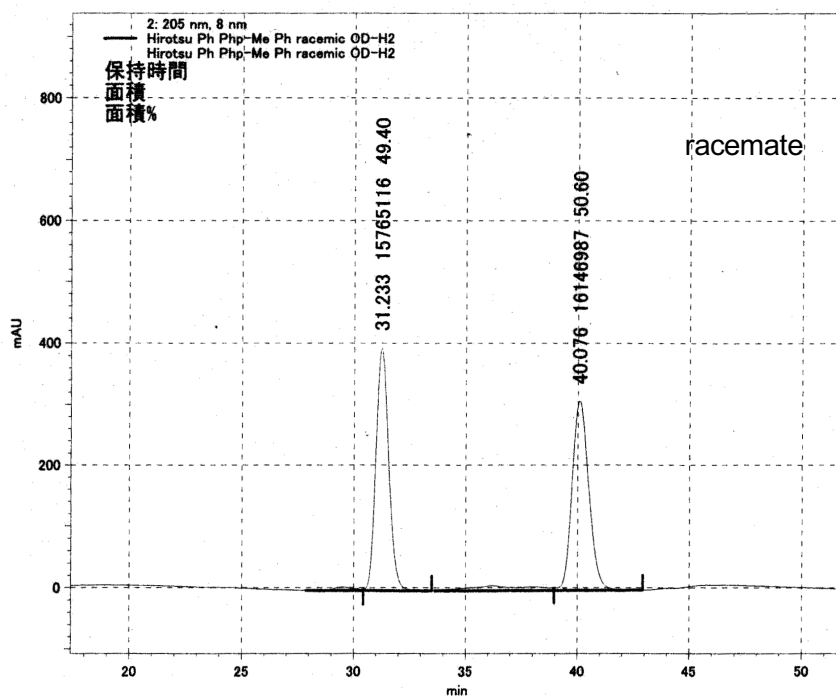

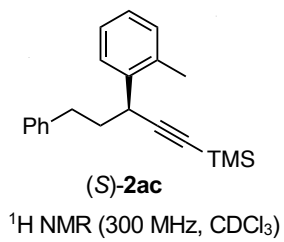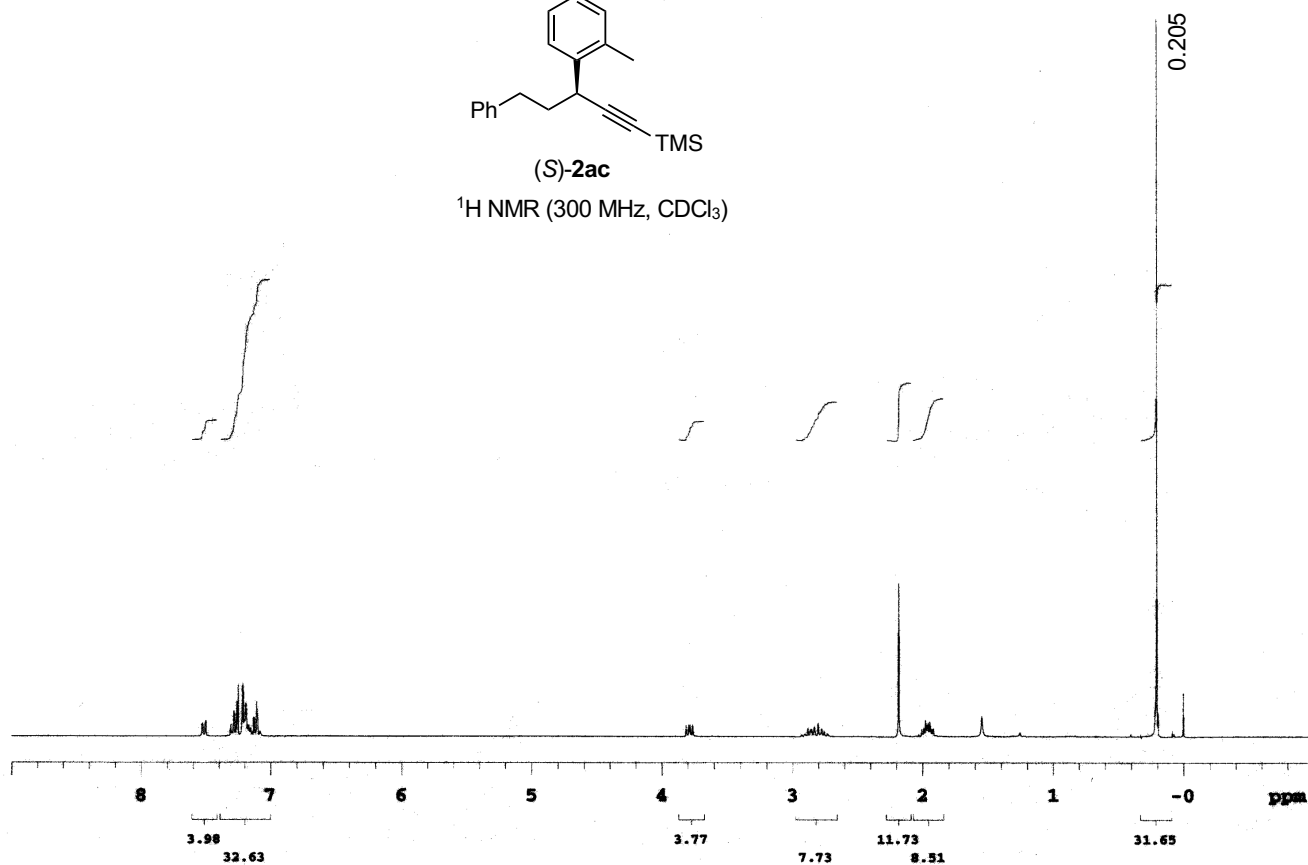

expansion of <sup>1</sup>H NMR

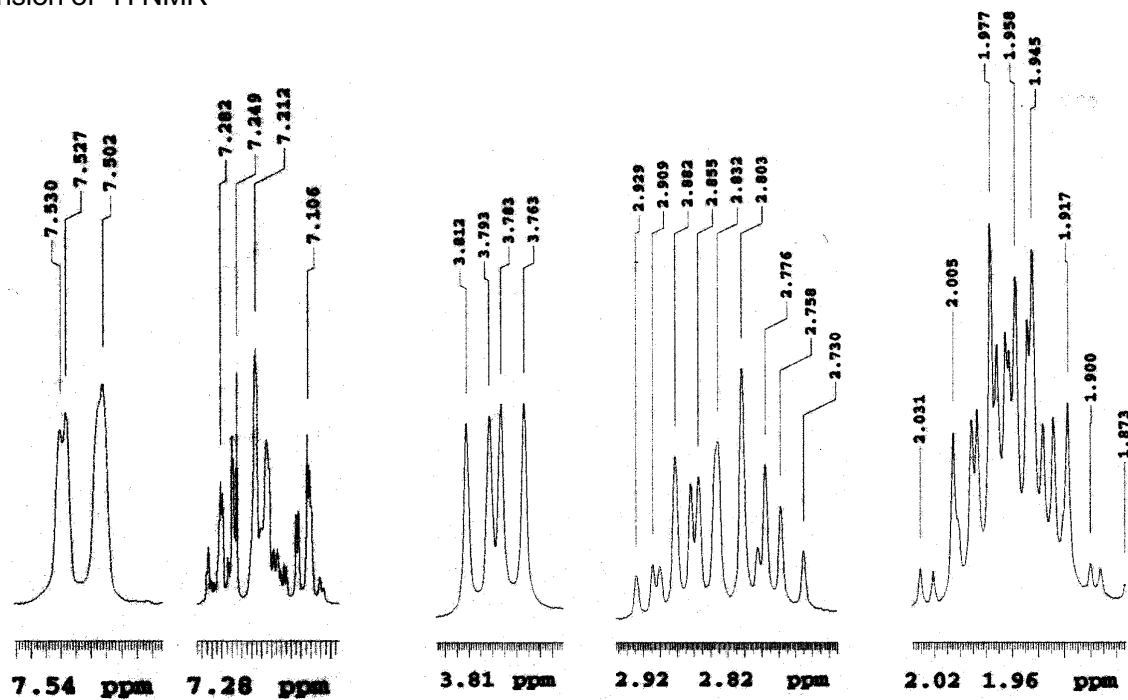

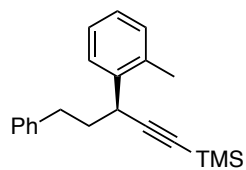

(S)-2ac

$^{13}\text{C}$  NMR (75 MHz,  $\text{CDCl}_3$ )

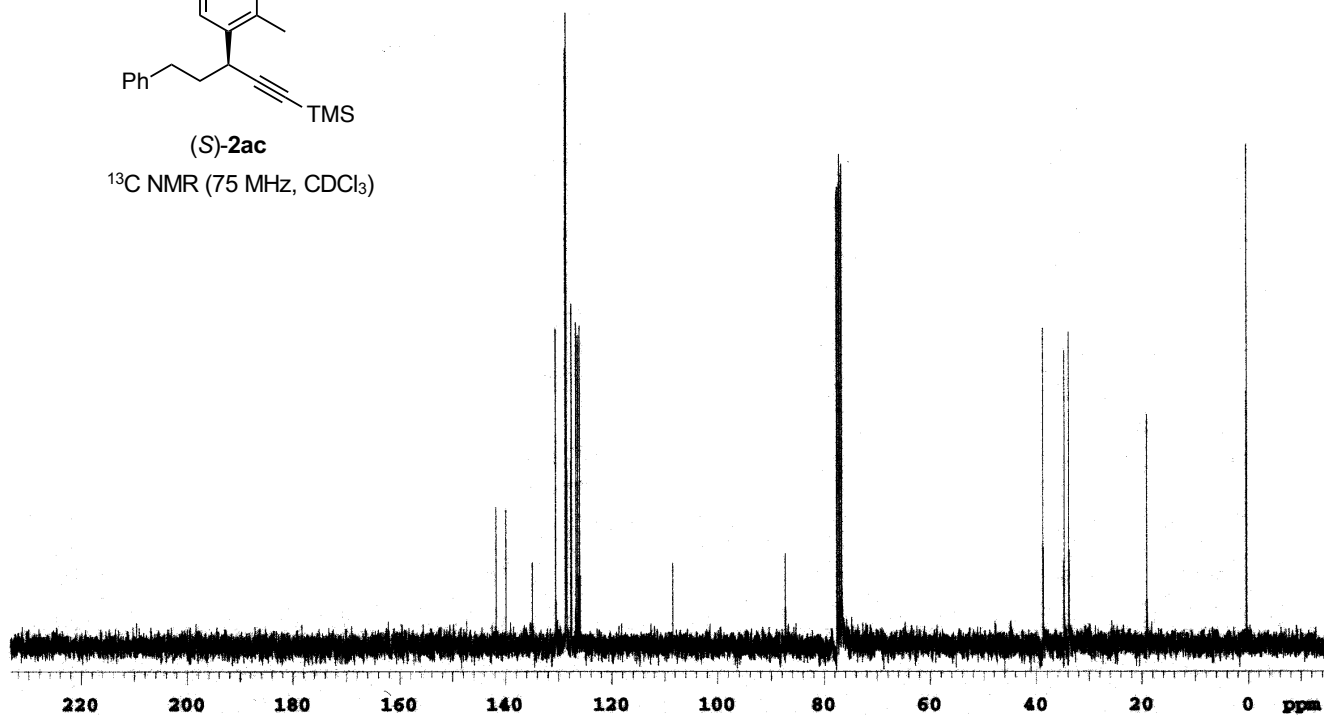

Expansion of  $^{13}\text{C}$ -APT NMR

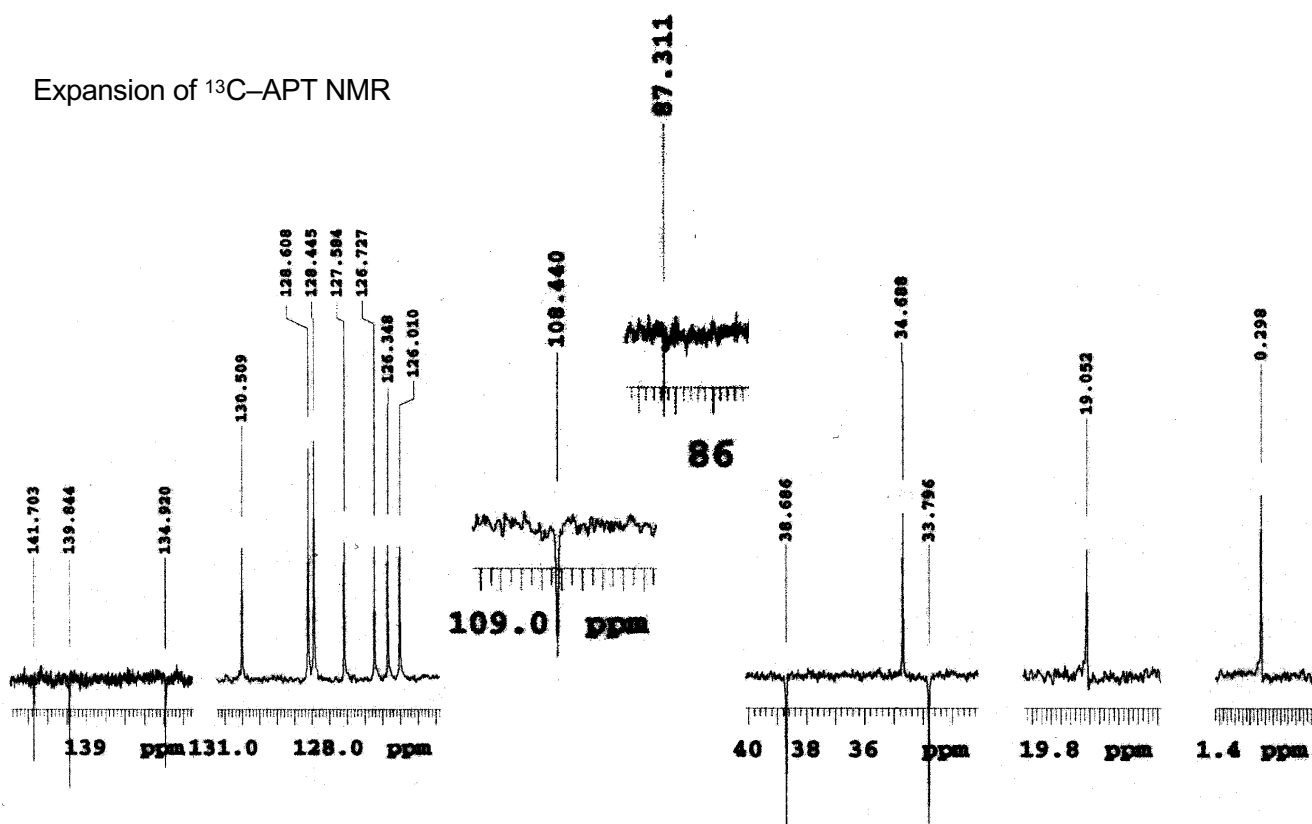

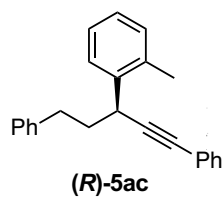

$^1\text{H}$  NMR (300 MHz,  $\text{CDCl}_3$ )

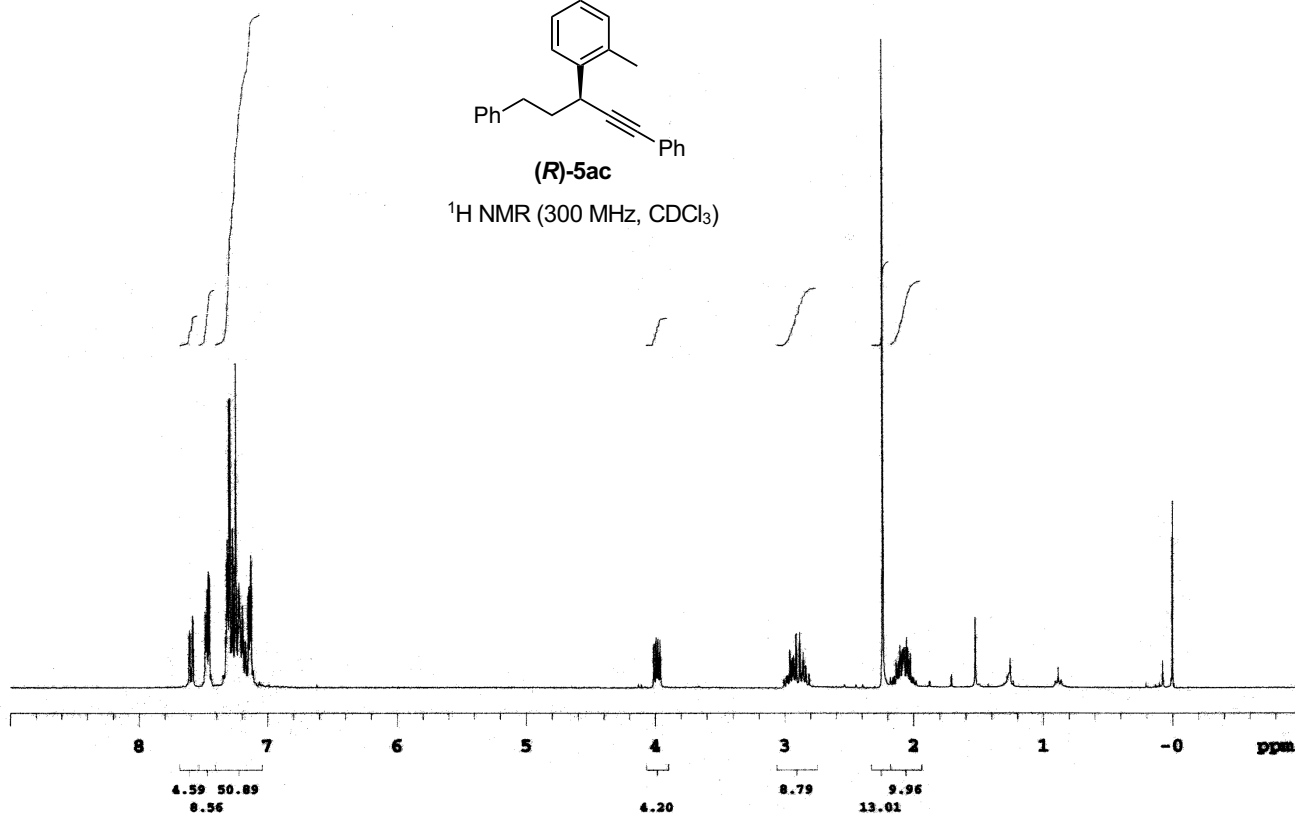

expansion of  $^1\text{H}$  NMR

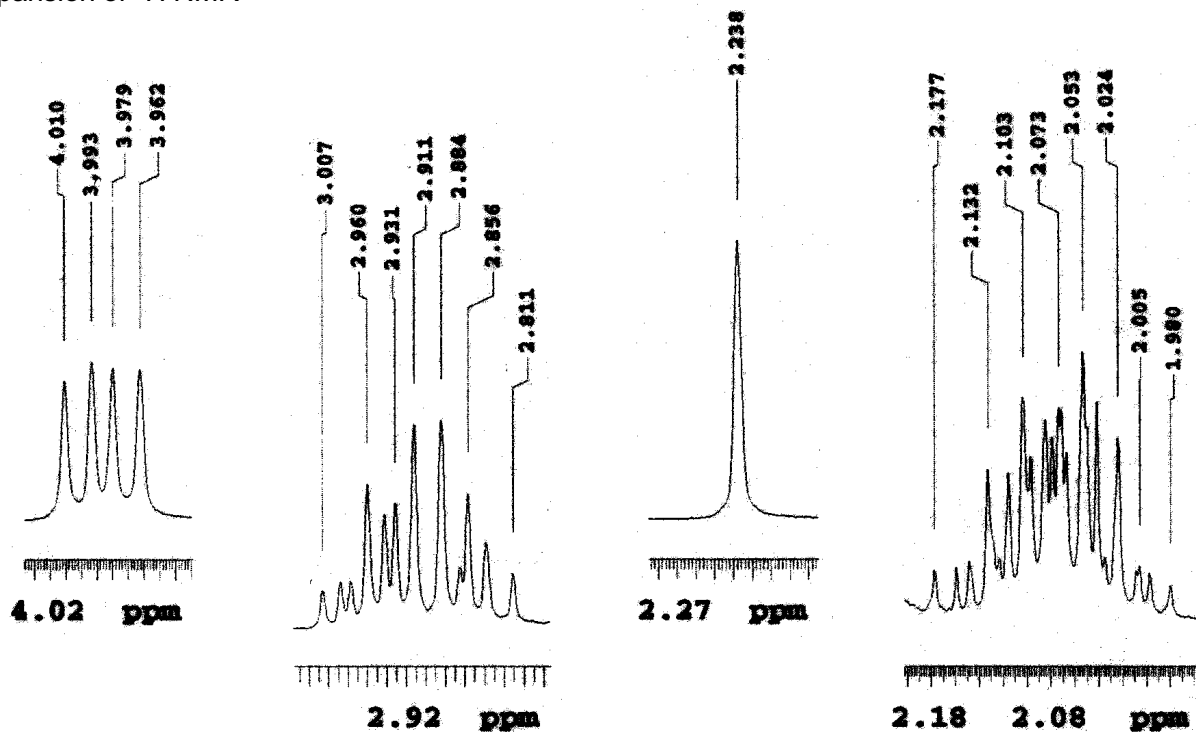

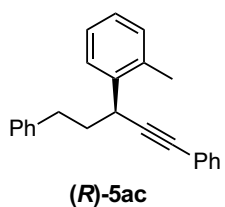

$$ee = (97.78 - 2.22) \times 100 / (97.78 + 2.22) = 96.0\%$$

$$es = 96 \times 100 / 98 = 98\%$$

Chiralcel OD-H, hexane/*i*-PrOH = 99.8:0.2, 0.3 mL/min, 25 °C

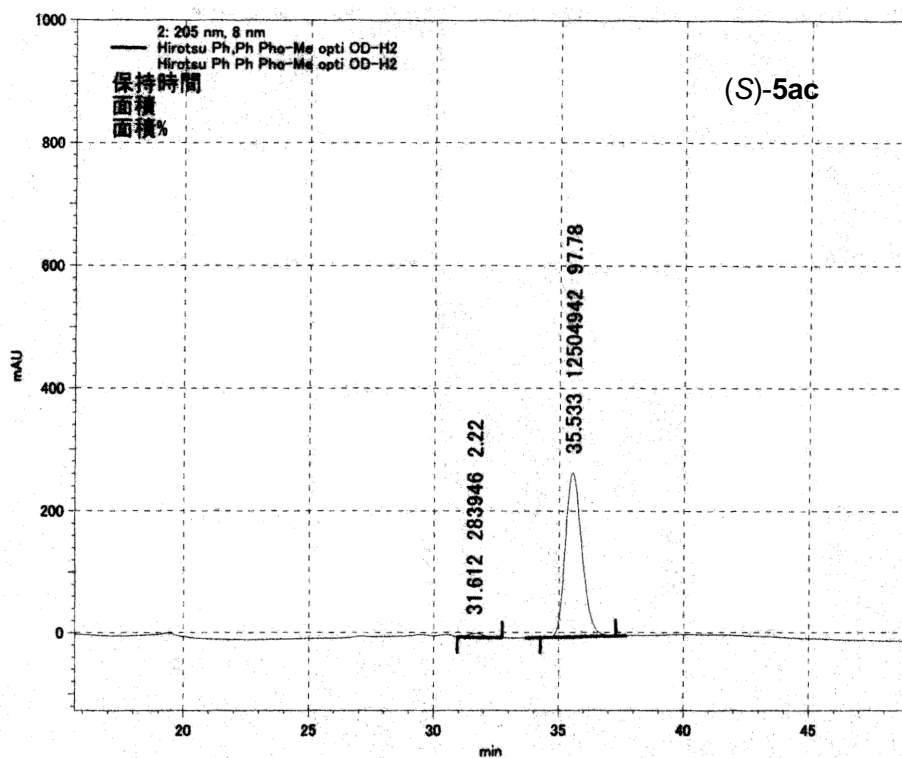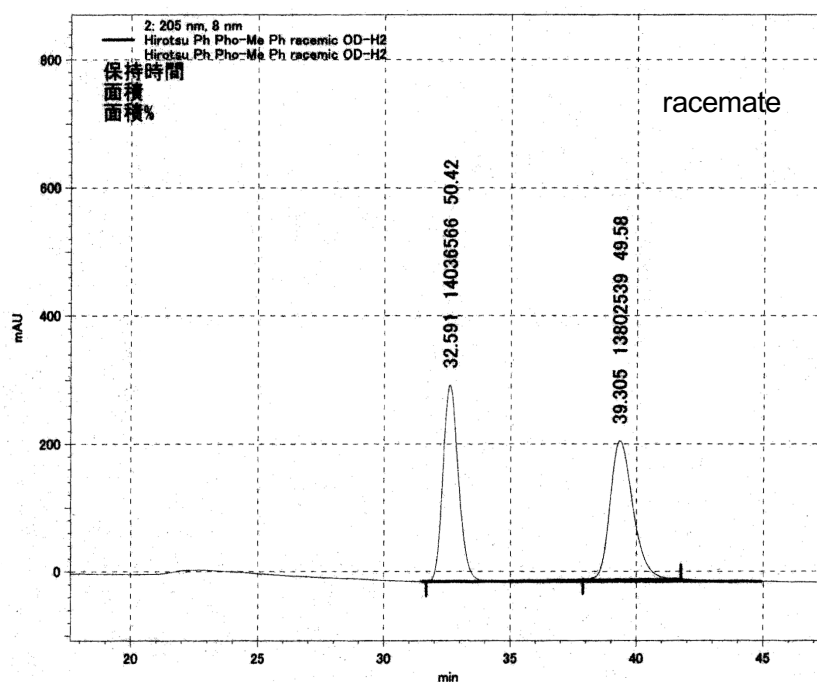



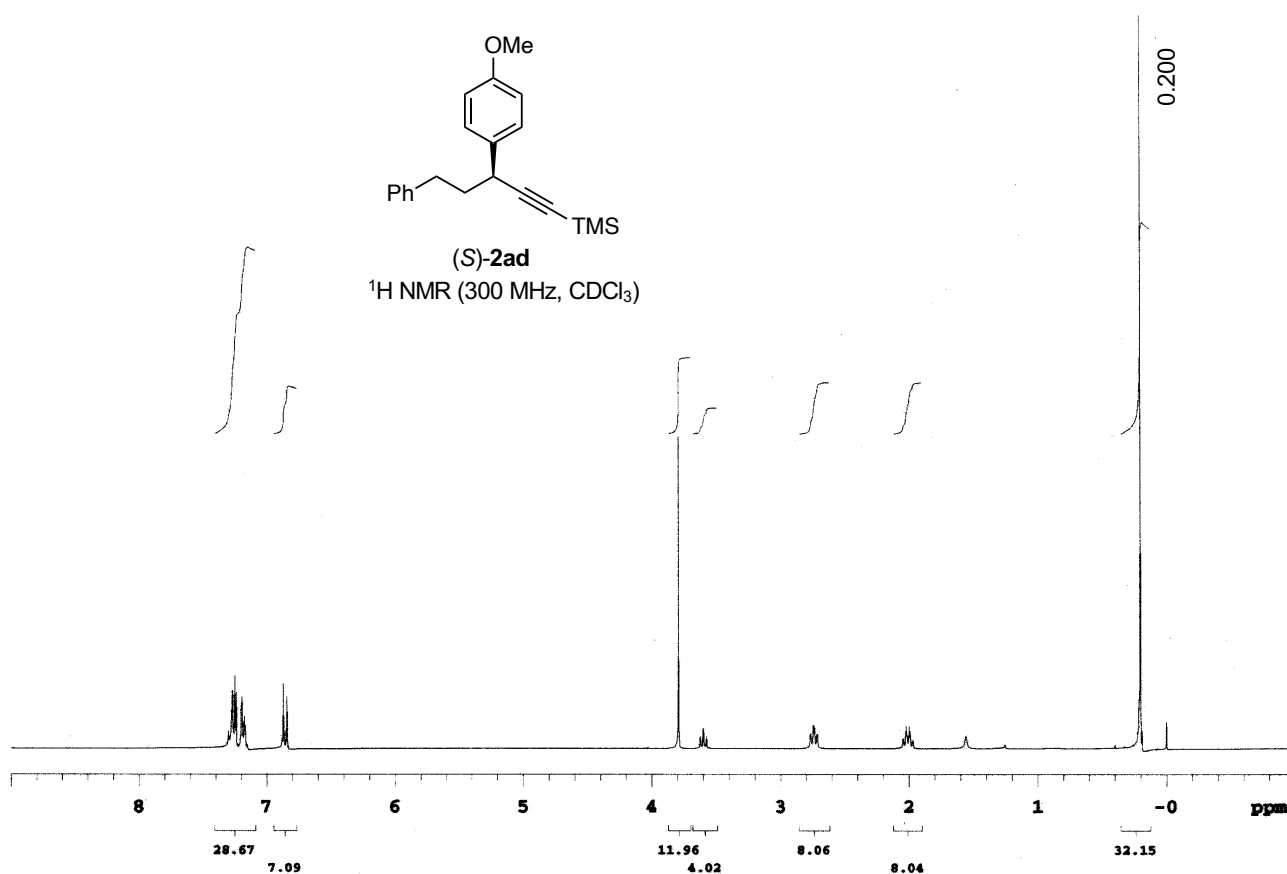

expansion of <sup>1</sup>H NMR

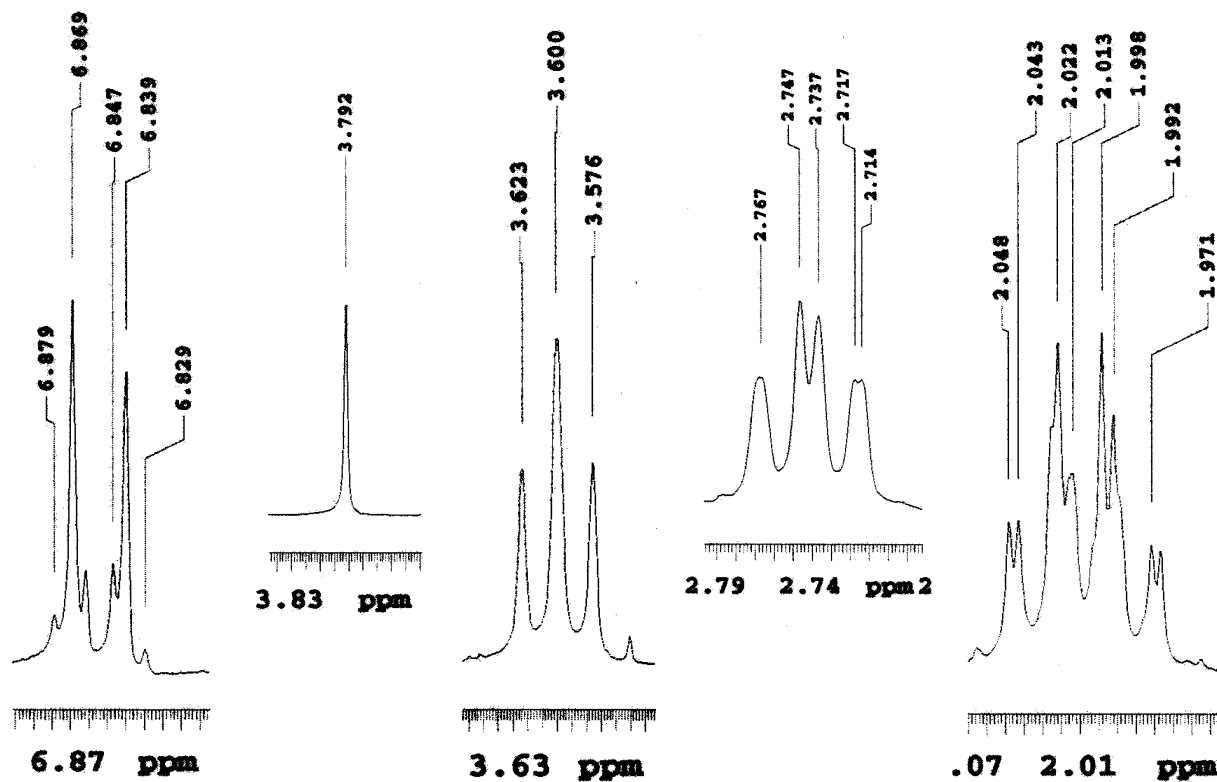

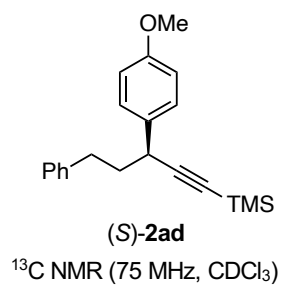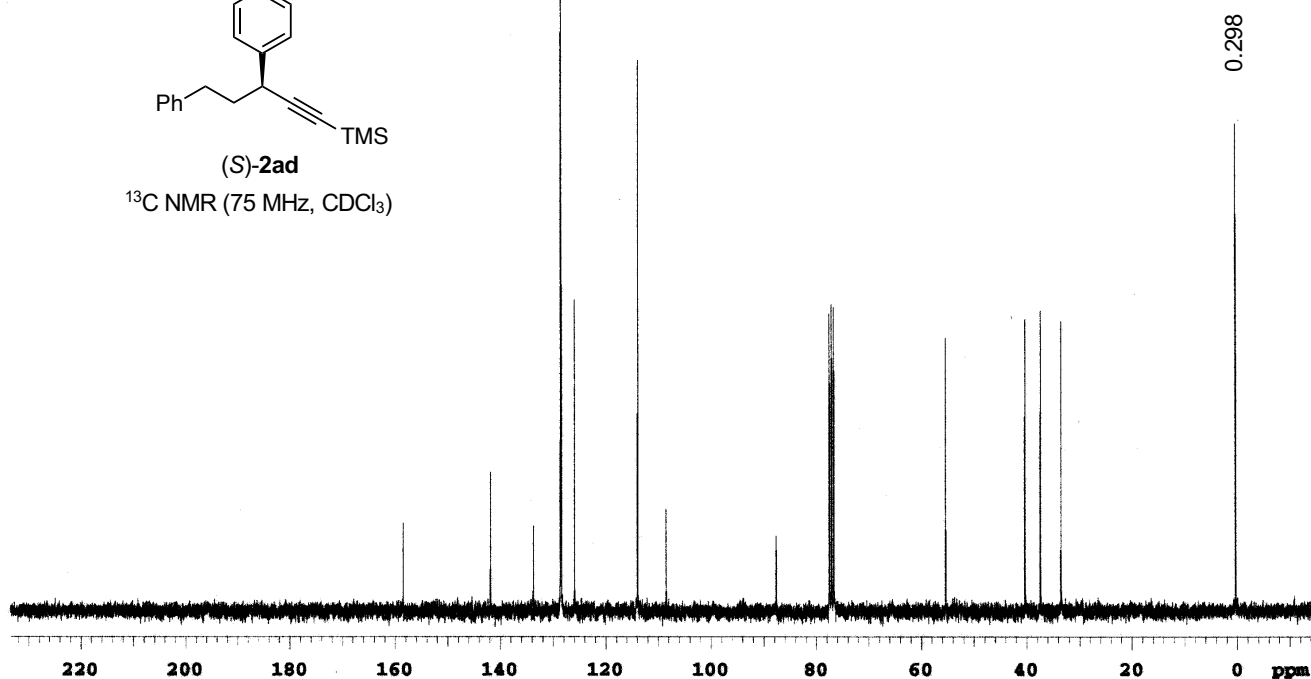

Expansion of <sup>13</sup>C–APT NMR

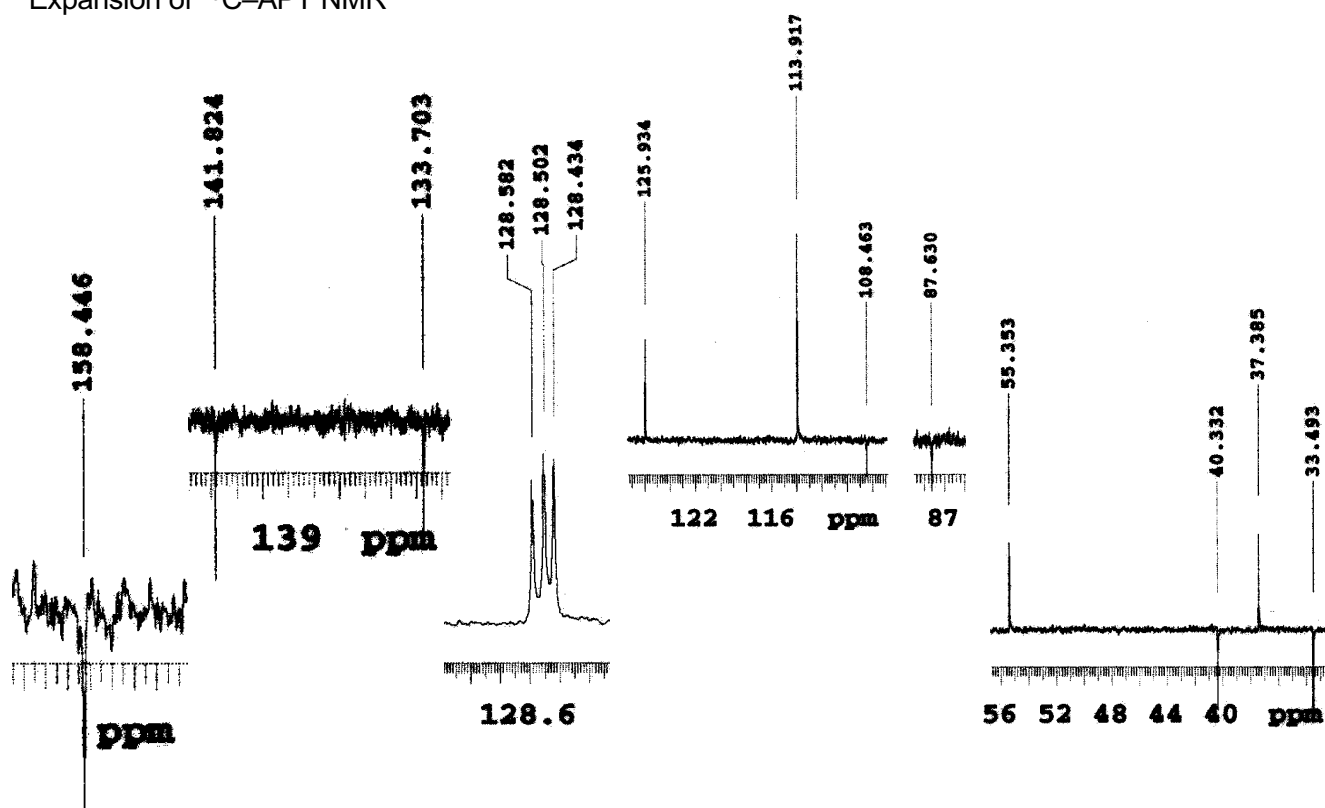

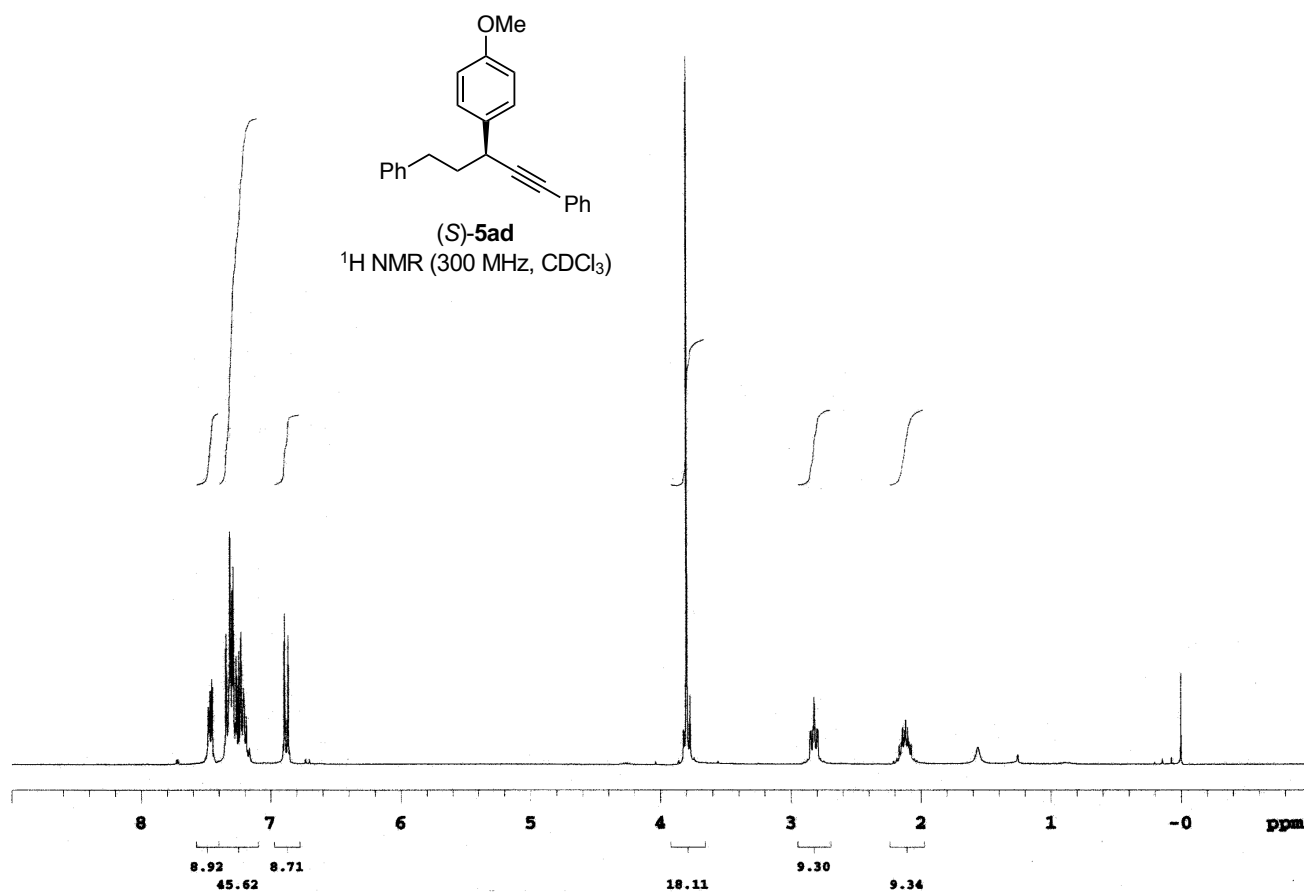

expansion of <sup>1</sup>H NMR

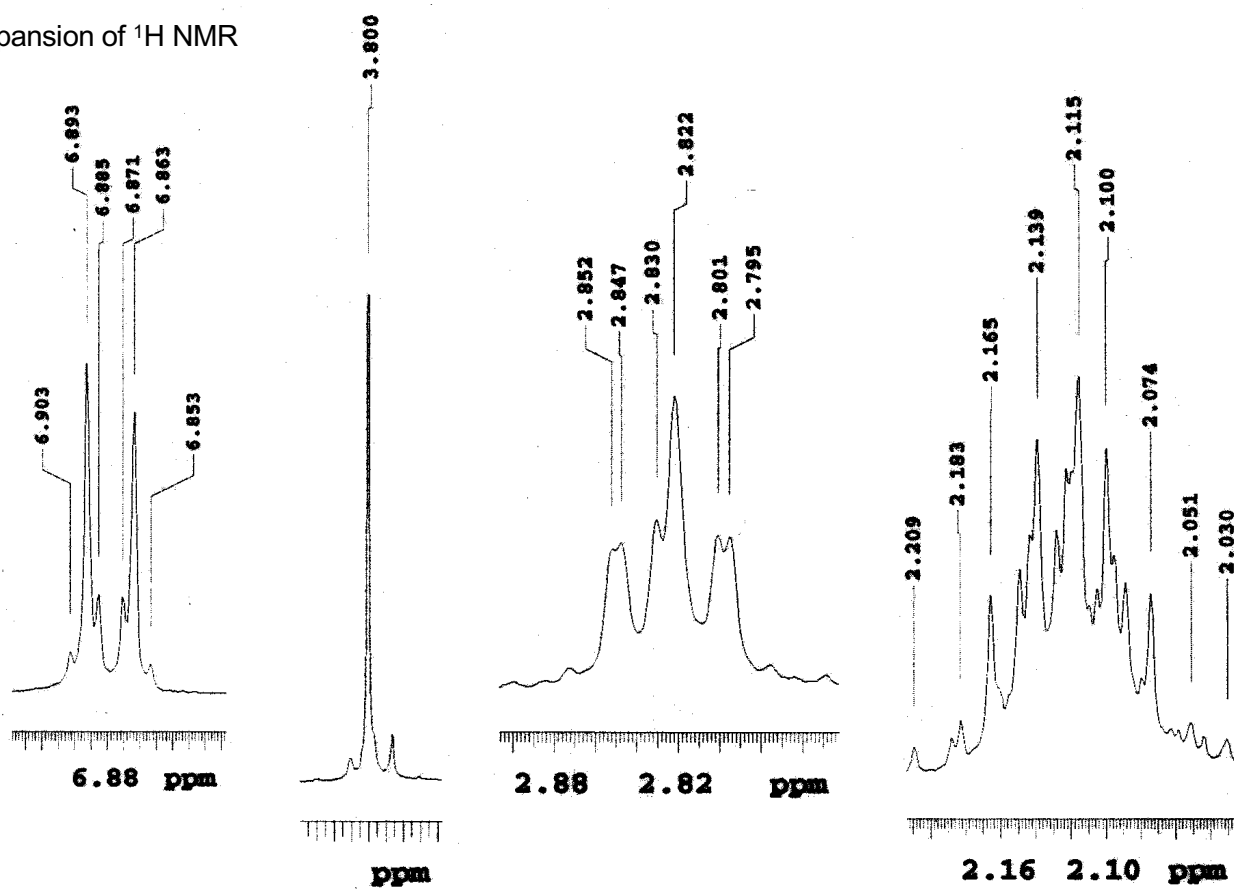

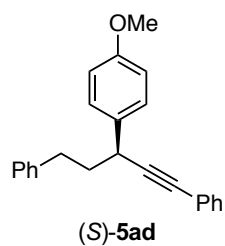

$$ee = (98.17 - 1.83) \times 100 / (98.17 + 1.83) = 96.3 \approx 96\%$$

$$es = 96 \times 100 / 98 = 98\%$$

Chiralcel OD-H, hexane/*i*-PrOH = 99.5:0.5, 0.3 mL/min, 25 °C

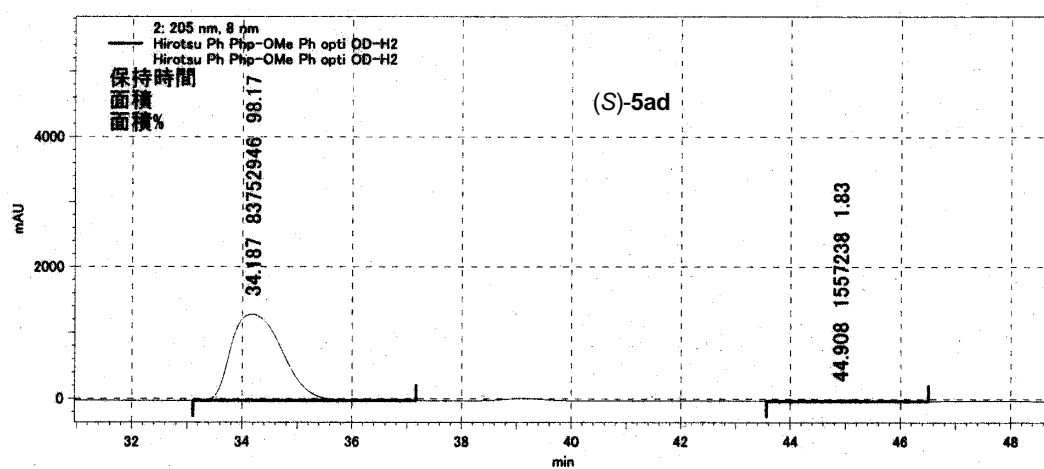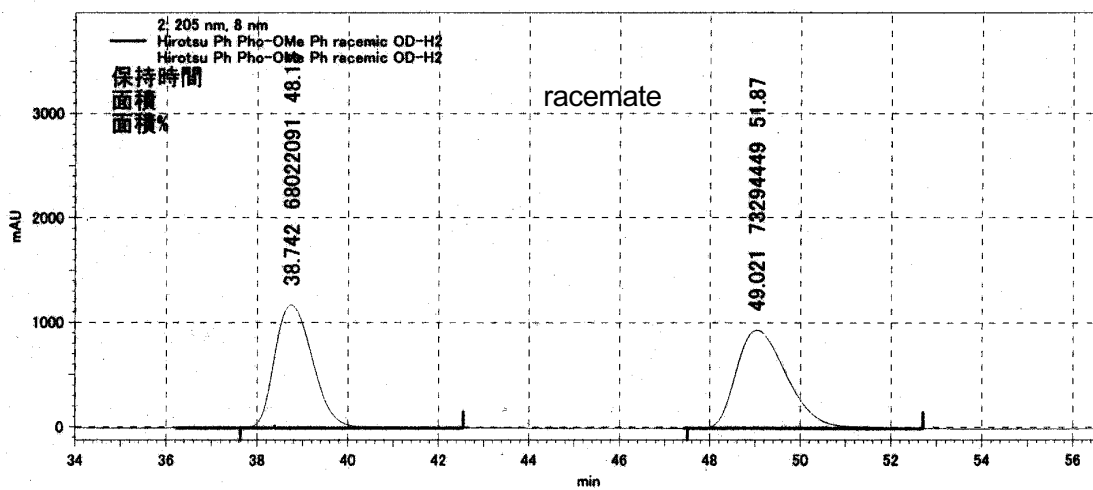

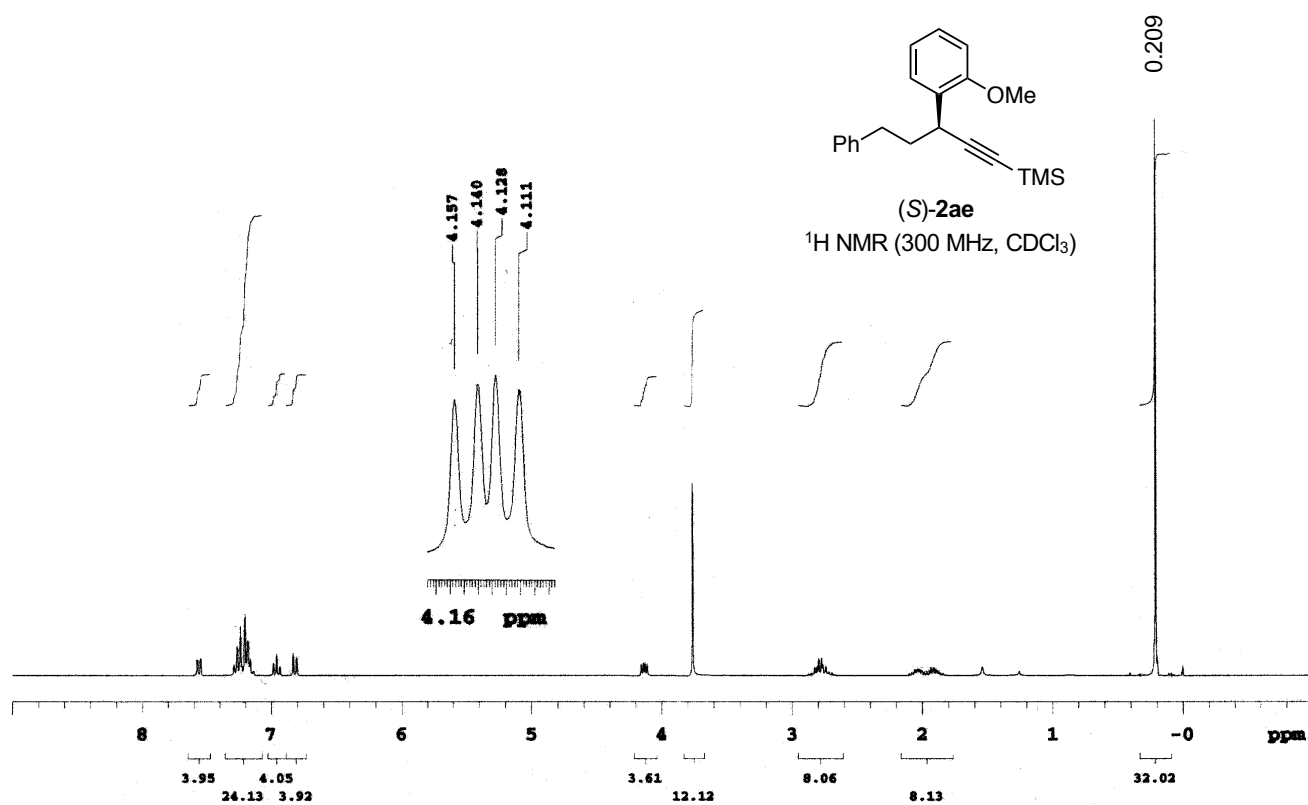

expansion of <sup>1</sup>H NMR

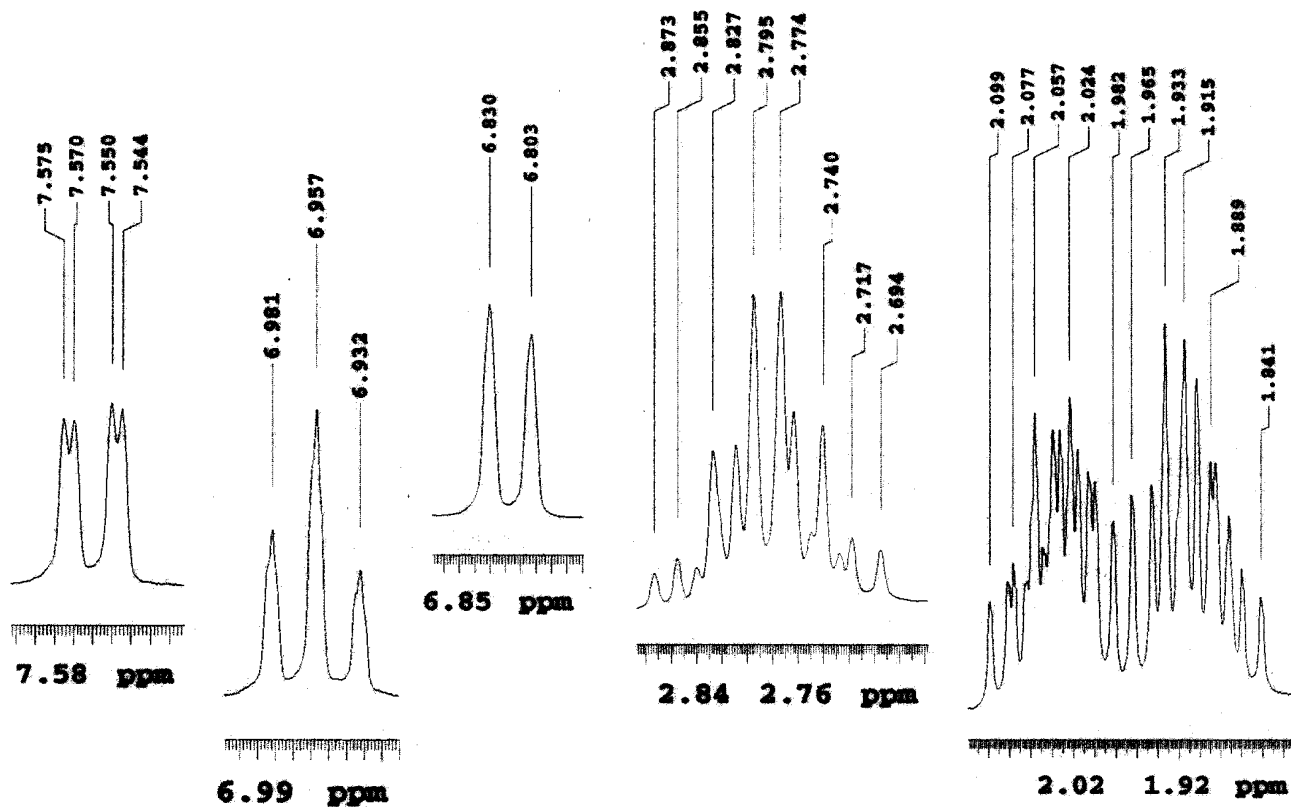

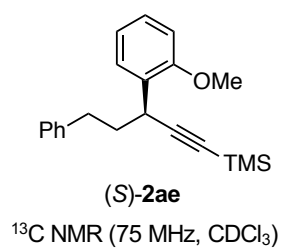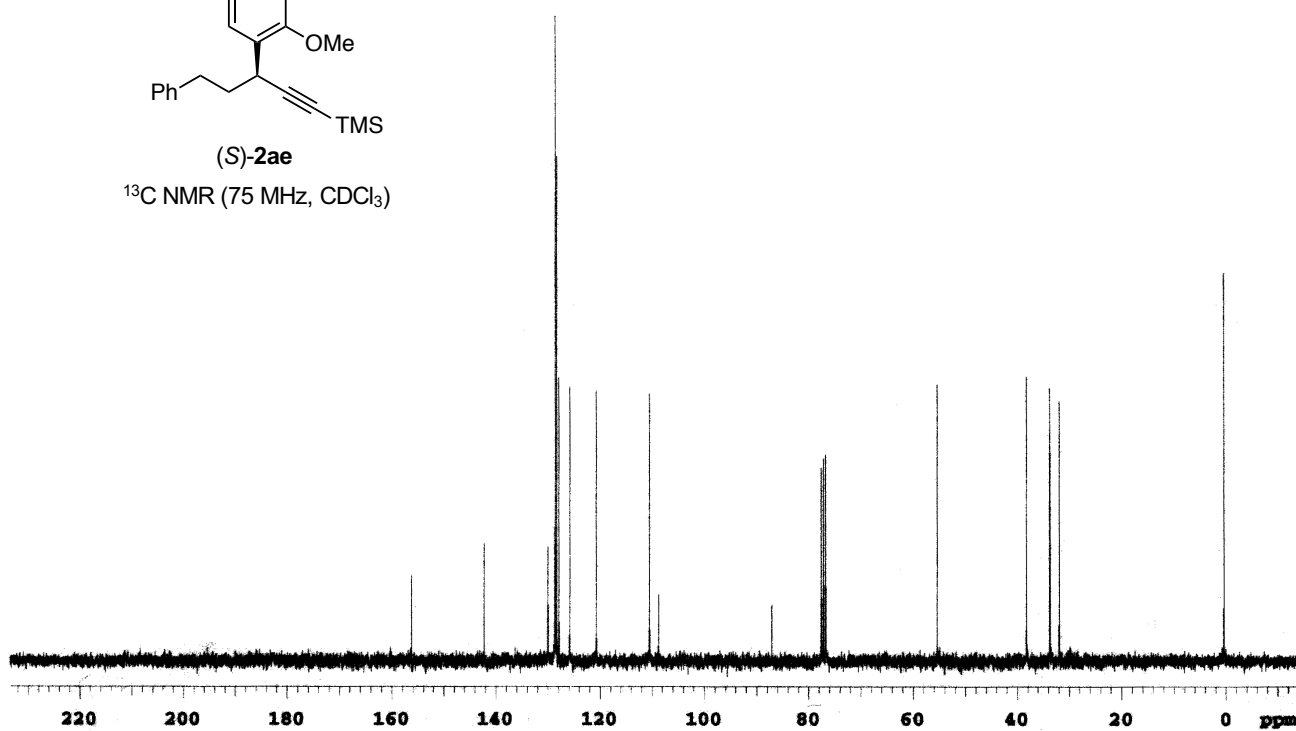

Expansion of  $^{13}\text{C}$ -APT NMR

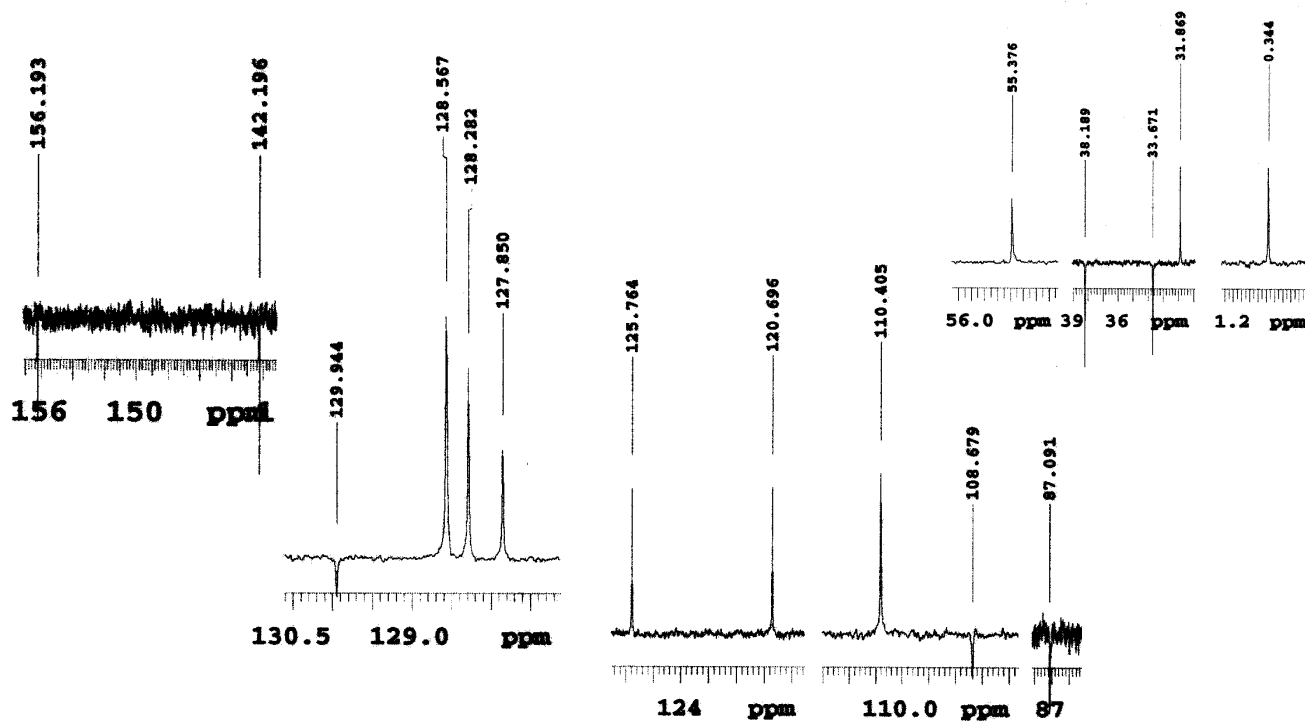

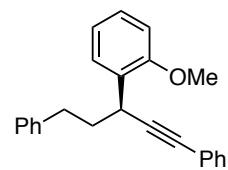

$^1\text{H}$  NMR (300 MHz,  $\text{CDCl}_3$ )

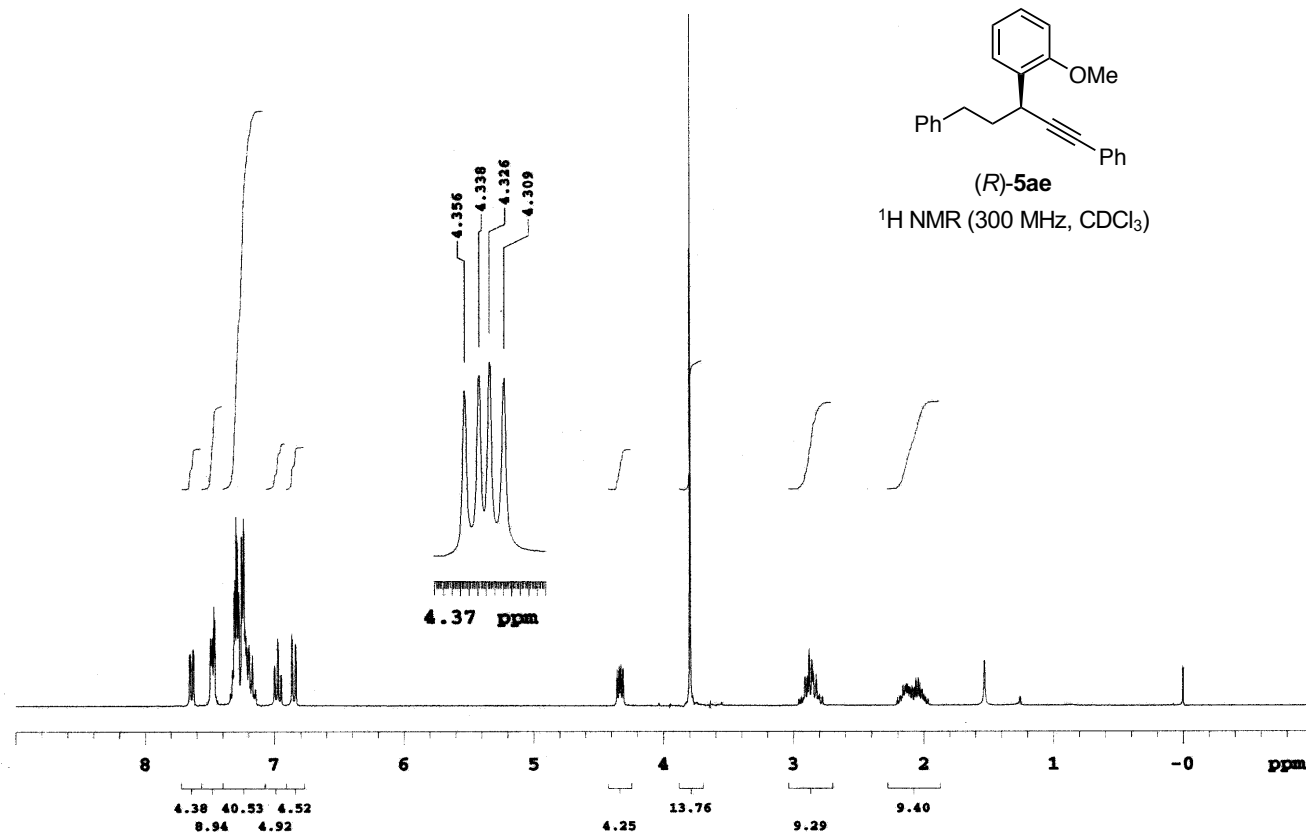

expansion of  $^1\text{H}$  NMR

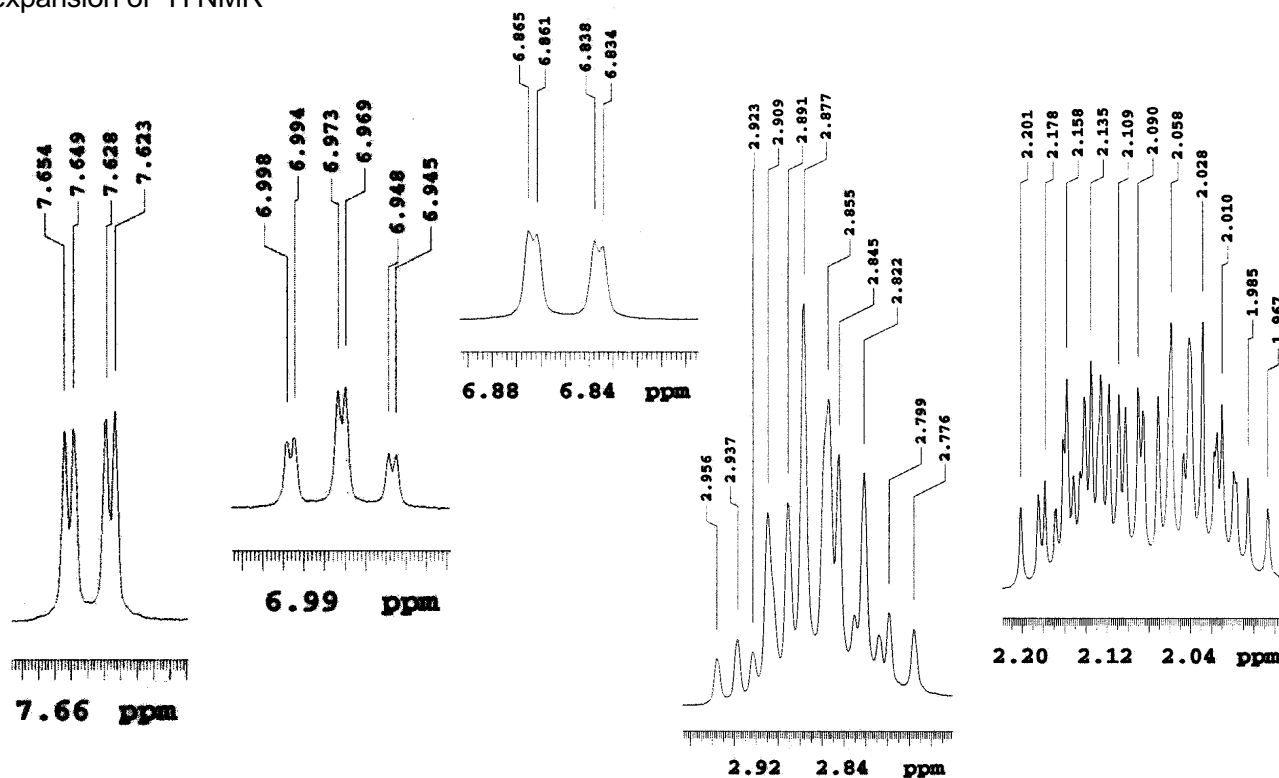

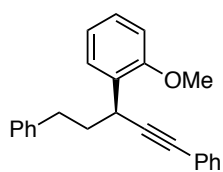

(*R*)-5ae

$^{13}\text{C}$  NMR (75 MHz,  $\text{CDCl}_3$ )

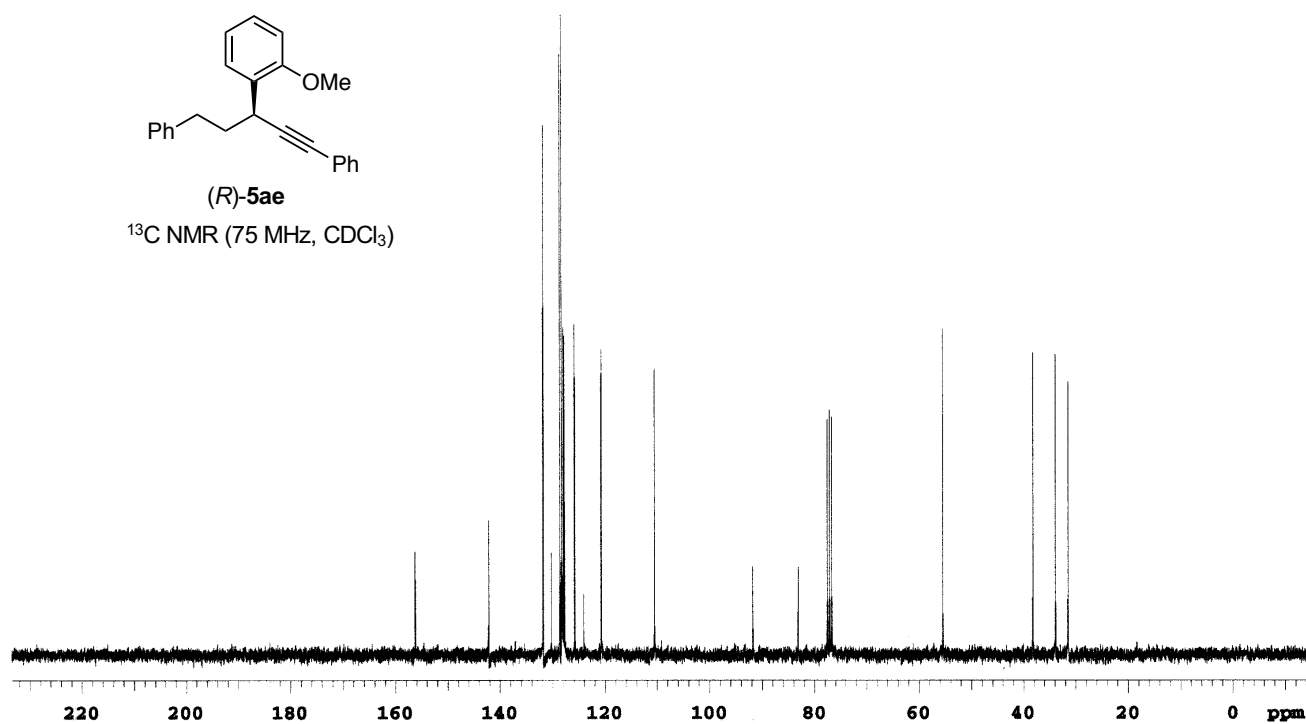

Expansion of  
 $^{13}\text{C}$ -APT NMR

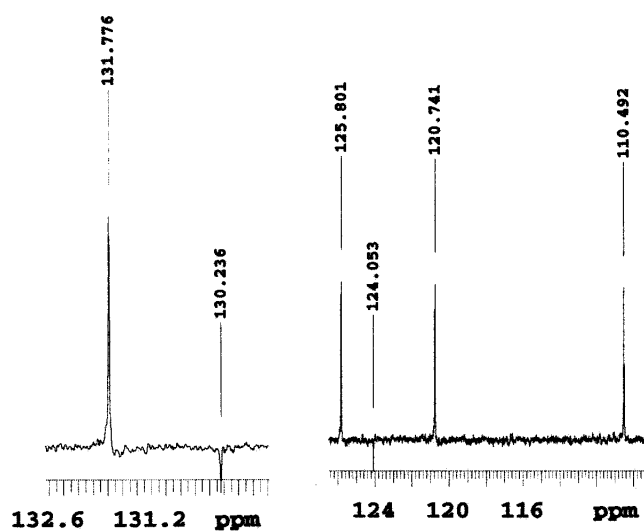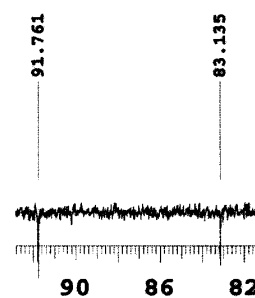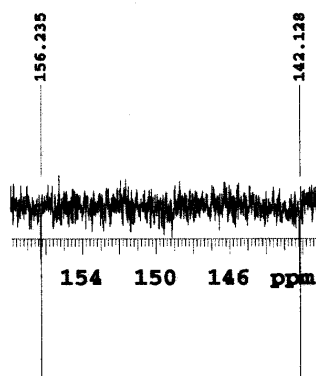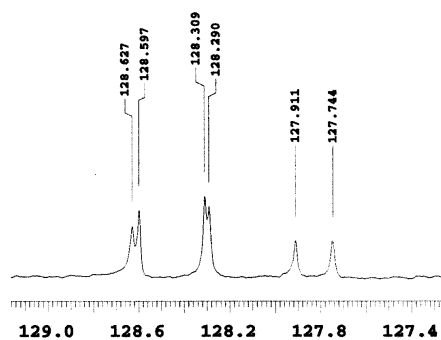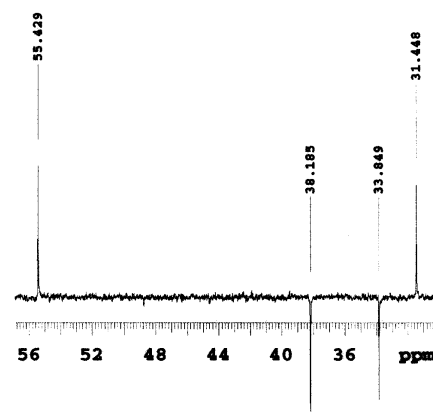



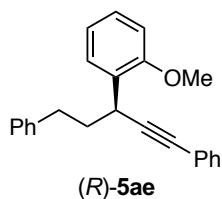

$$ee = (98.98 - 1.02) \times 100 / (98.98 + 1.02) = 97.96\%$$

$$es = 97.96 \times 100 / 98 = 99.96\%$$

$$\approx >99\%$$

Chiralcel OD-H, hexane/*i*-PrOH = 99.5:0.5, 0.3 mL/min, 25 °C

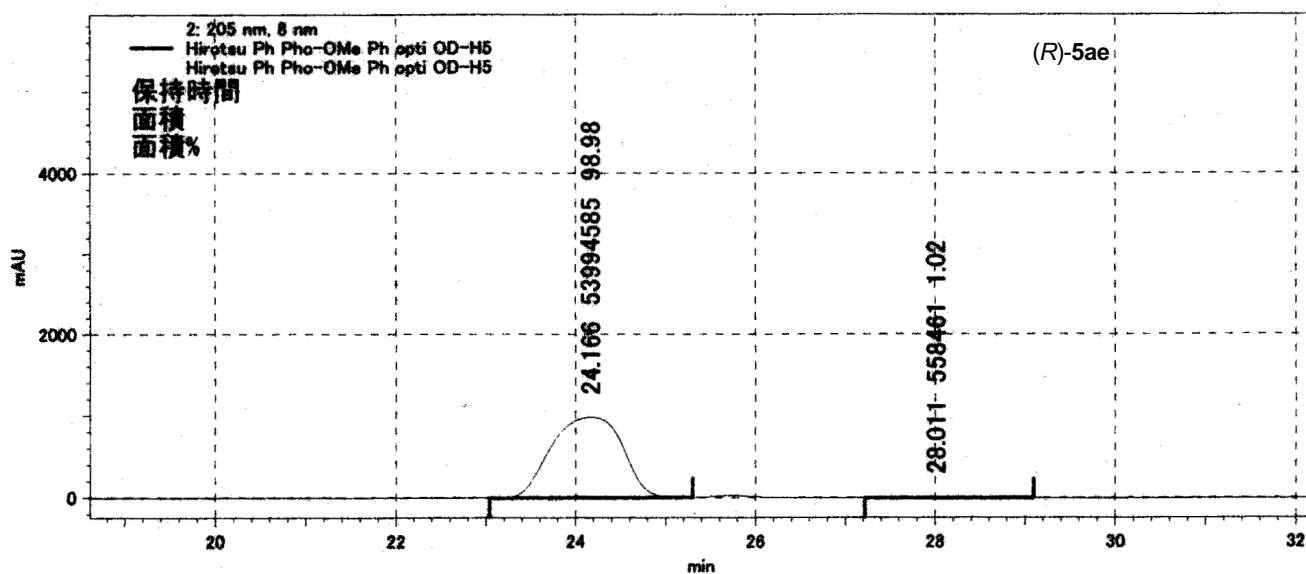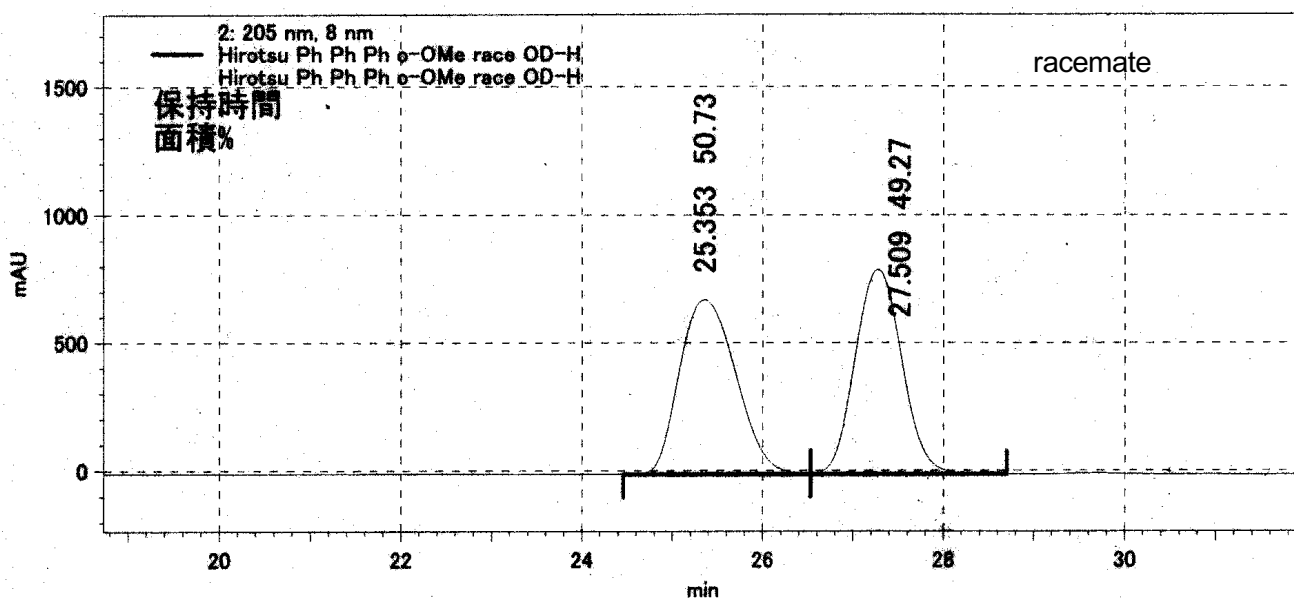

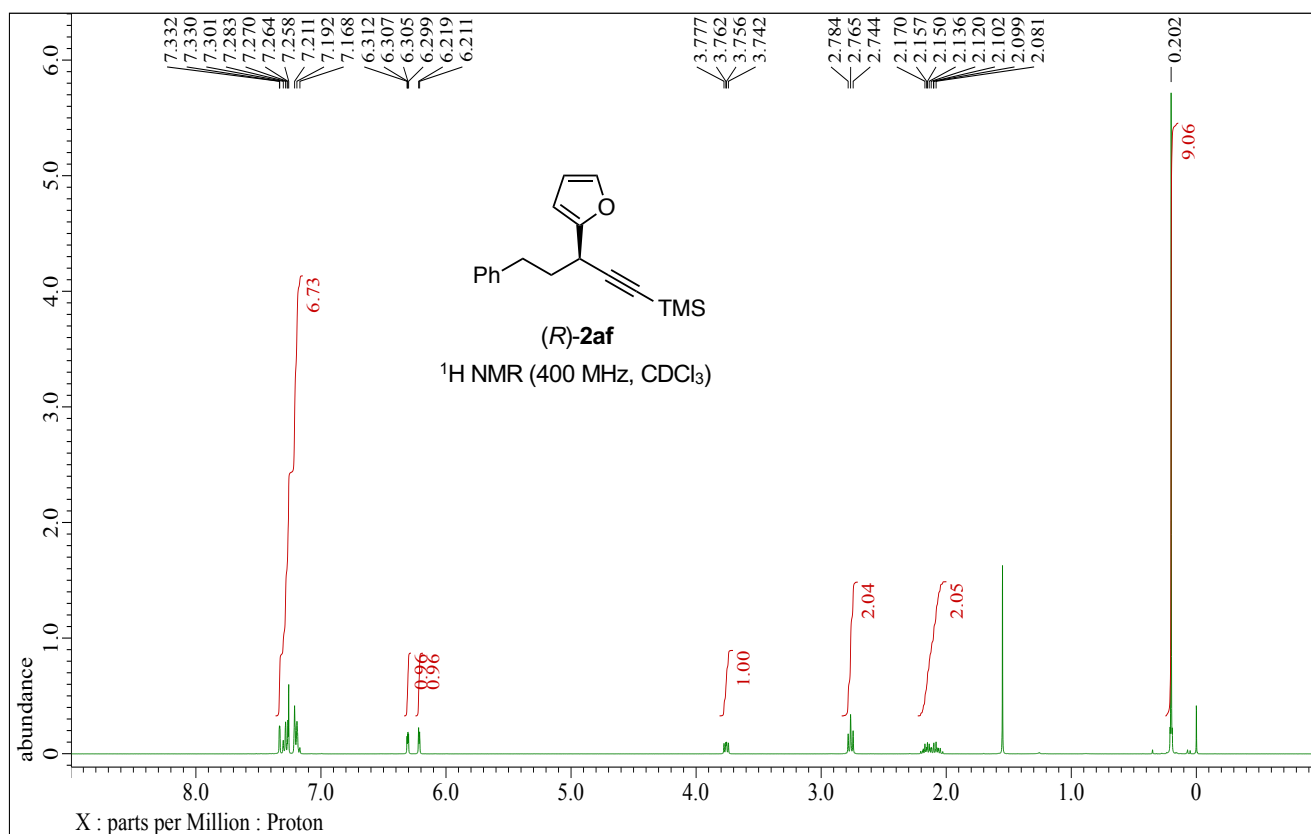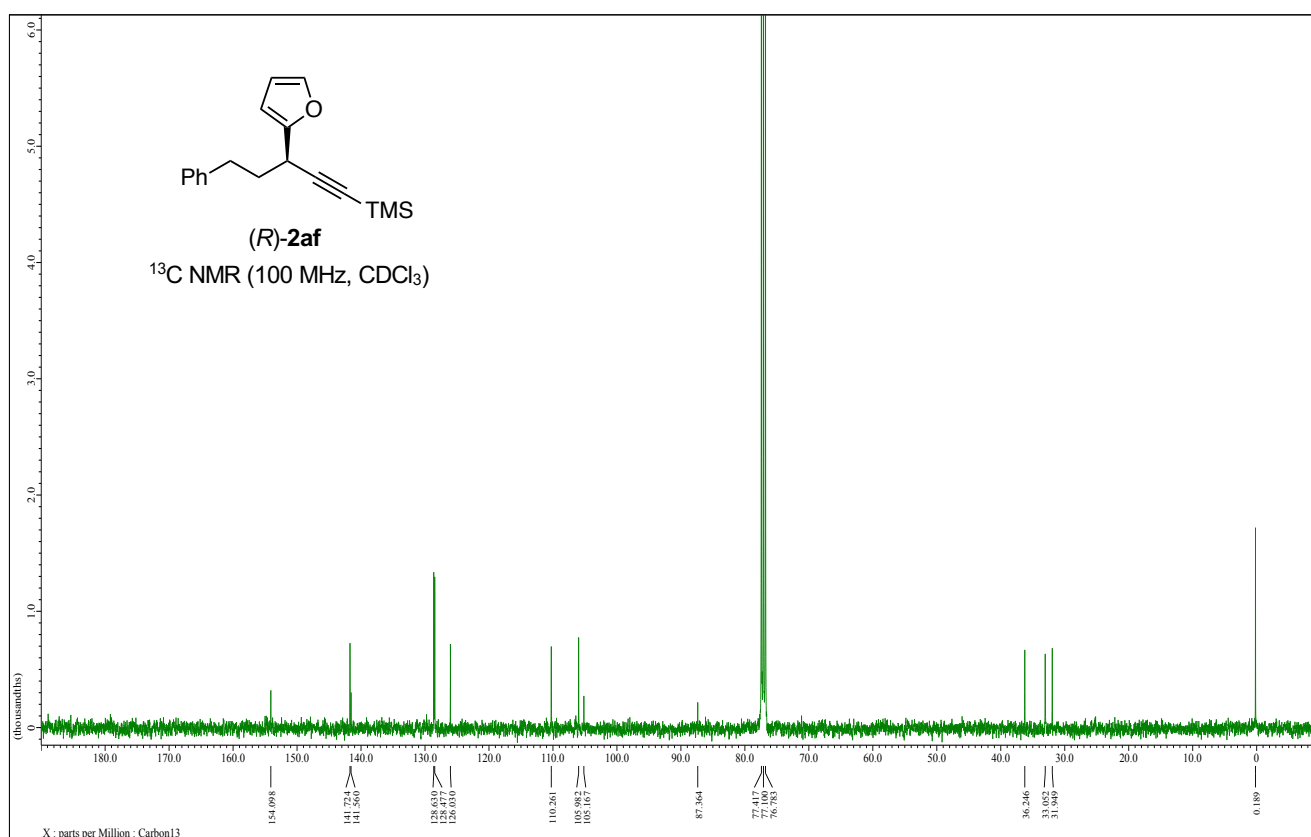

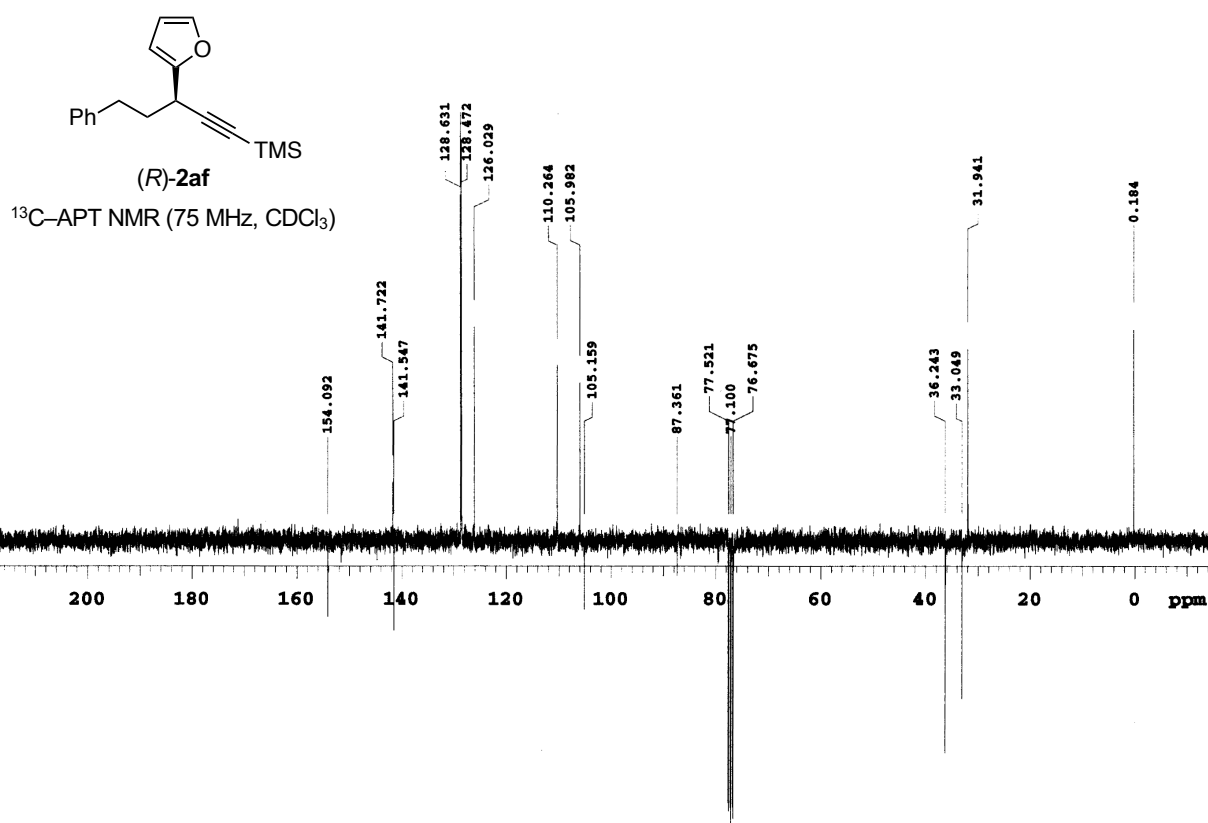

Expansion of <sup>13</sup>C-APT NMR

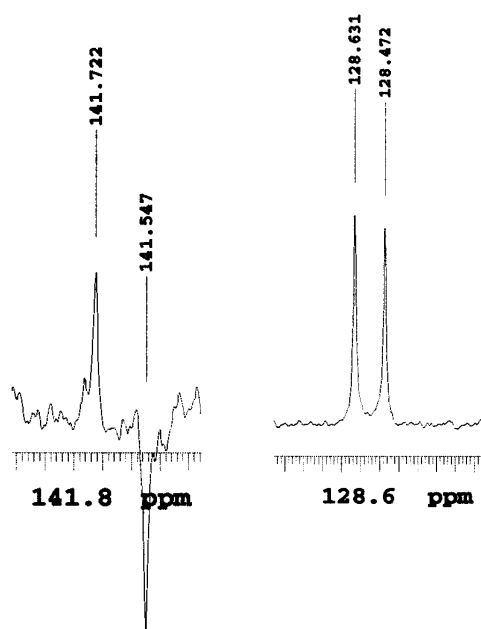

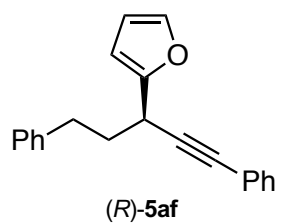

$^1\text{H}$  NMR (300 MHz,  $\text{CDCl}_3$ )

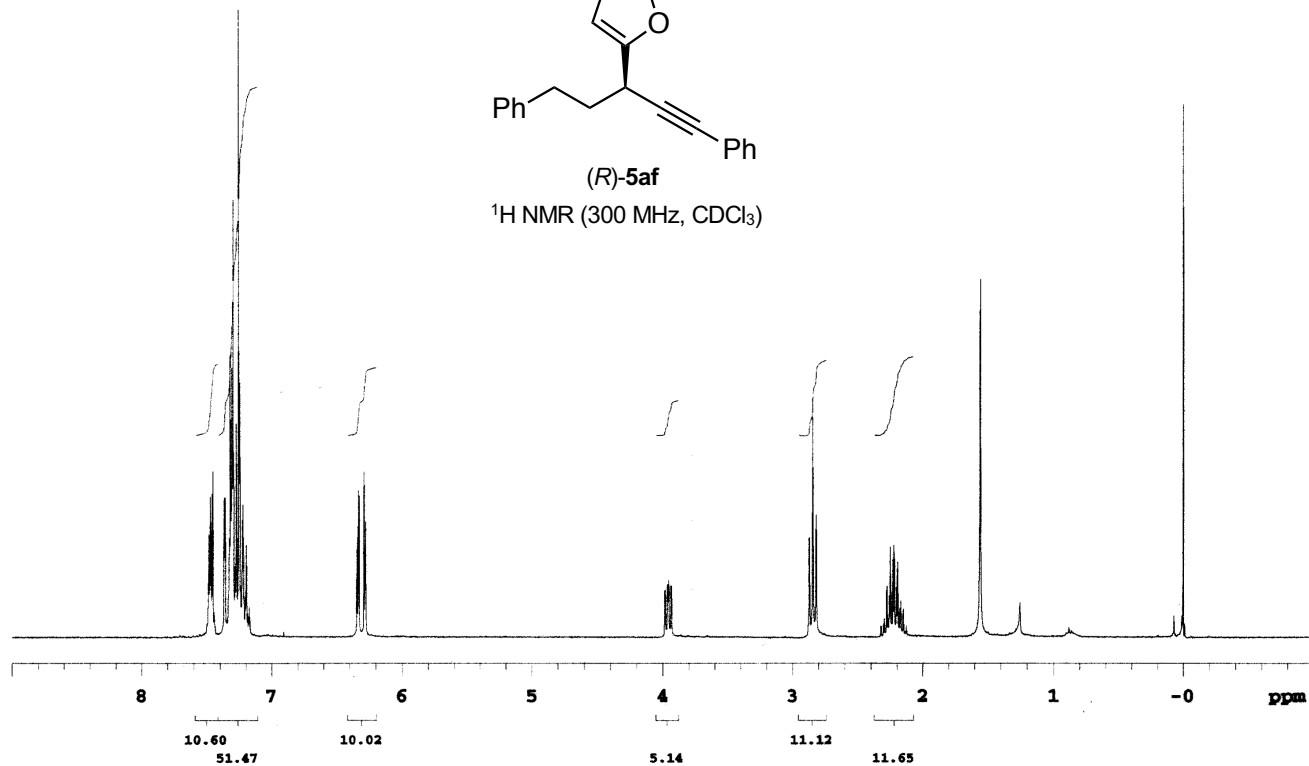

expansion of  $^1\text{H}$  NMR

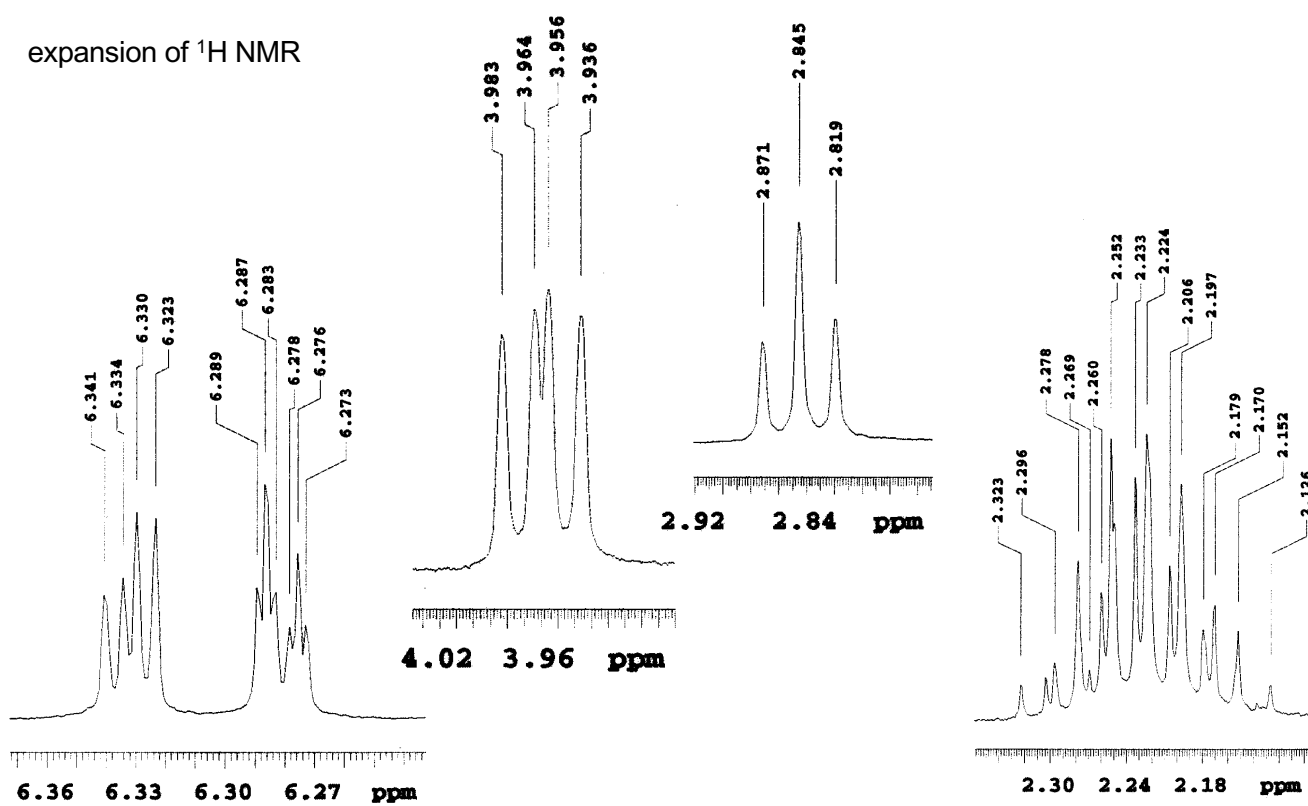

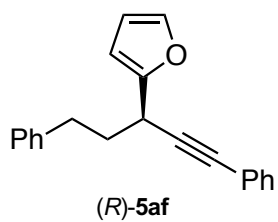

$$ee = (96.11 - 3.89) \times 100 / (96.11 + 3.89) = 92.22 \approx 92\%$$

$$es = 92 \times 100 / 97 = 94.8 \approx 95\%$$

Chiralpak AD-H, hexane/*i*-PrOH = 99.5:0.5, 0.3 mL/min, 25 °C

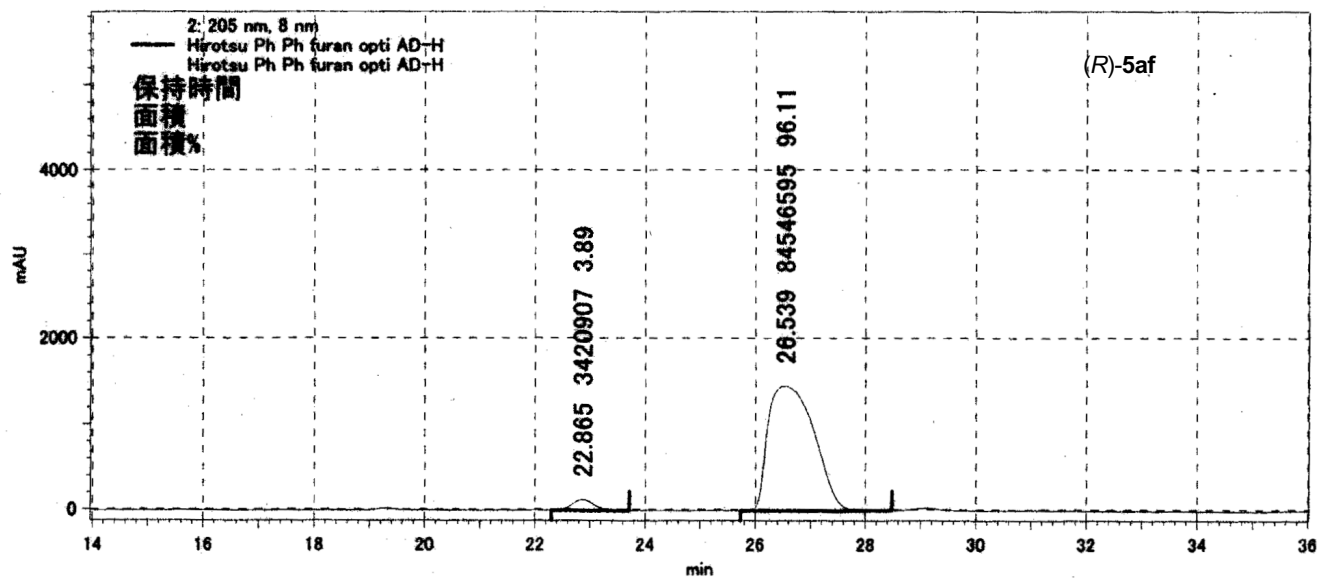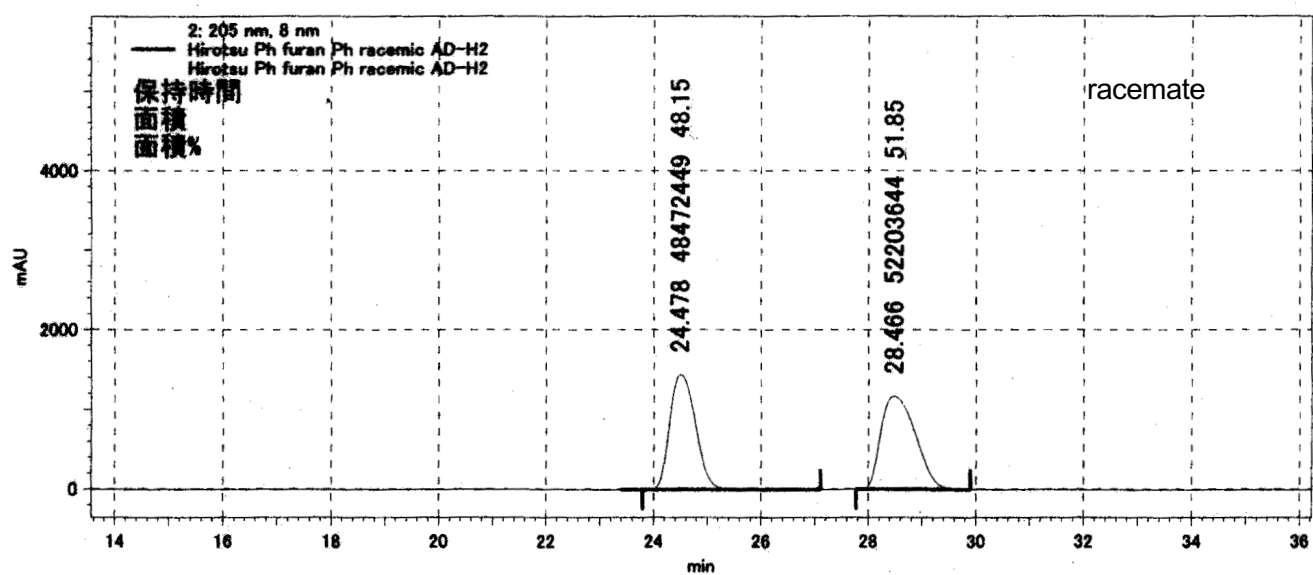

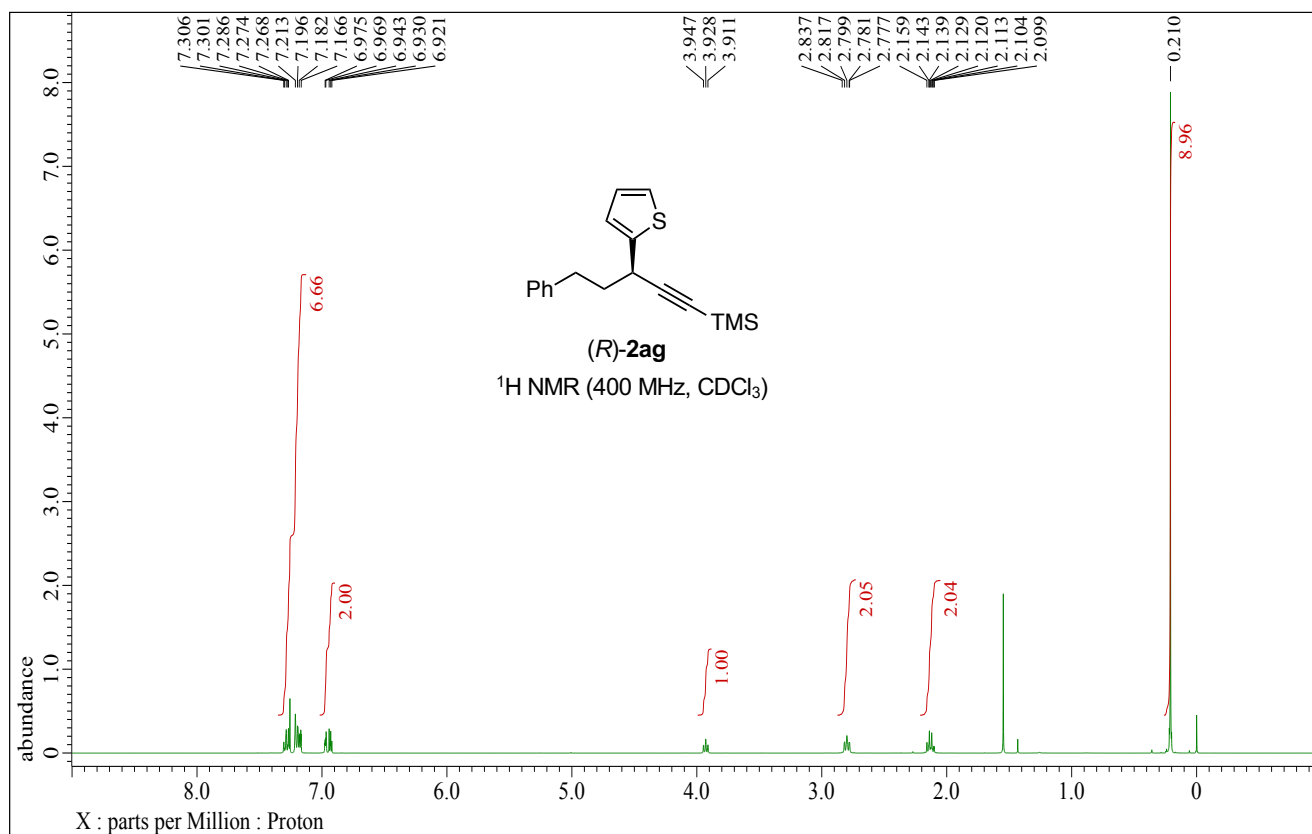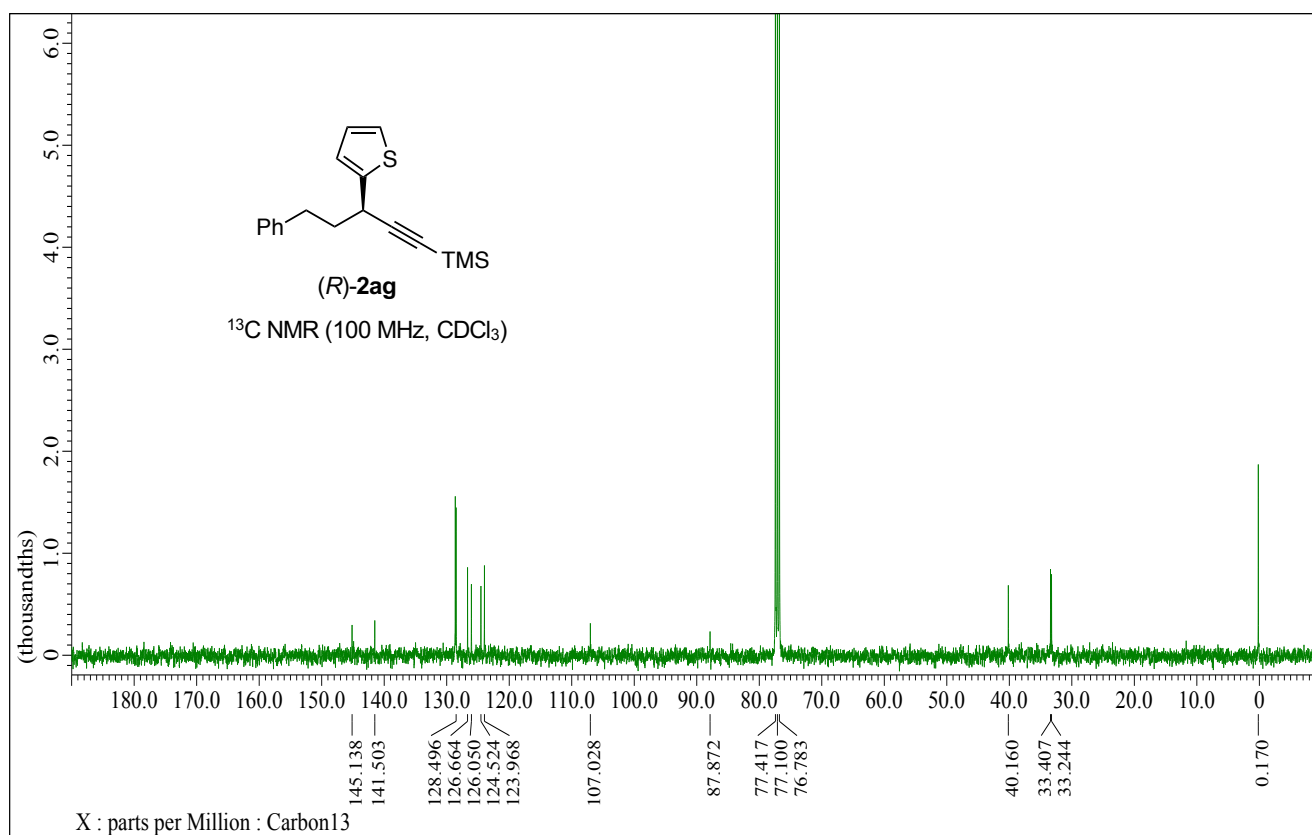

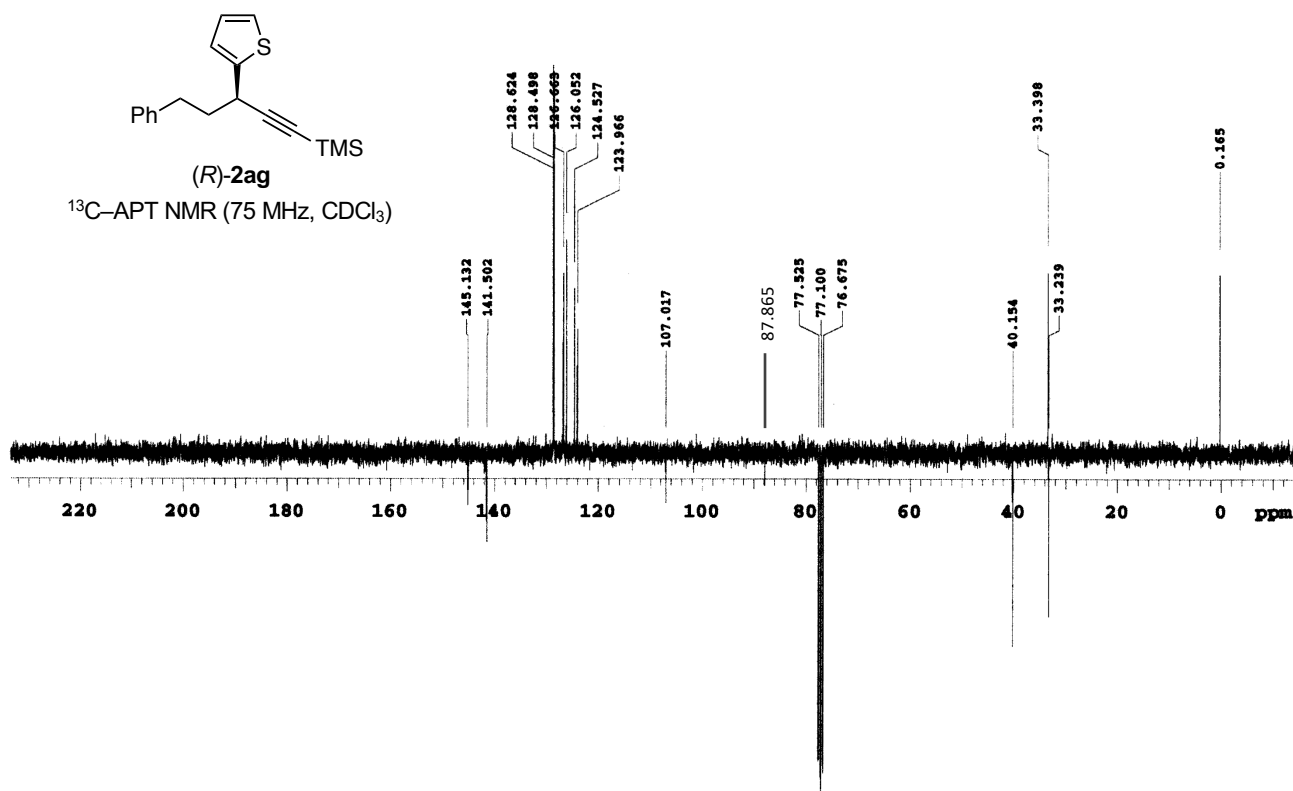

Expansion of  $^{13}\text{C}$ -APT NMR

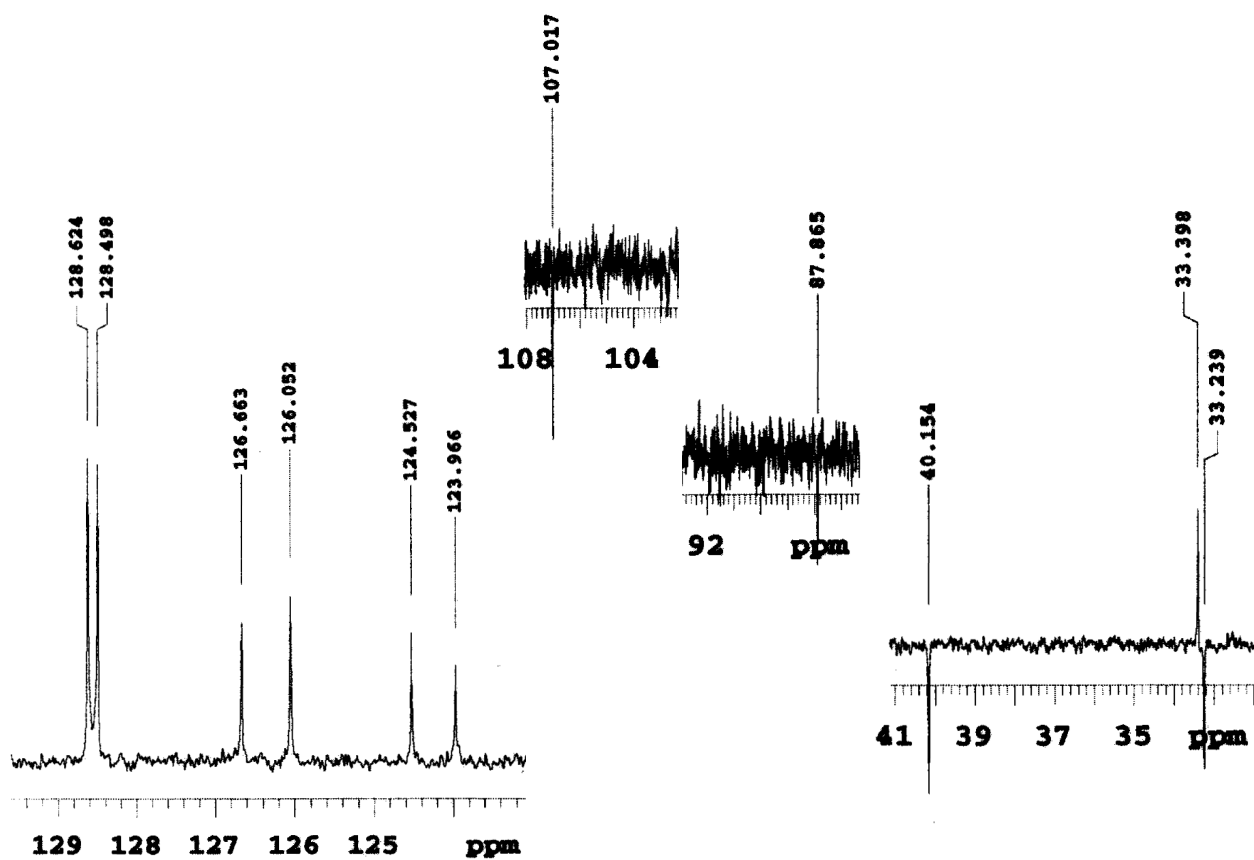

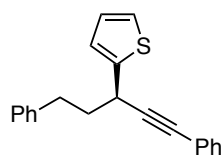

(*R*)-5ag

$^1\text{H}$  NMR (300 MHz,  $\text{CDCl}_3$ )

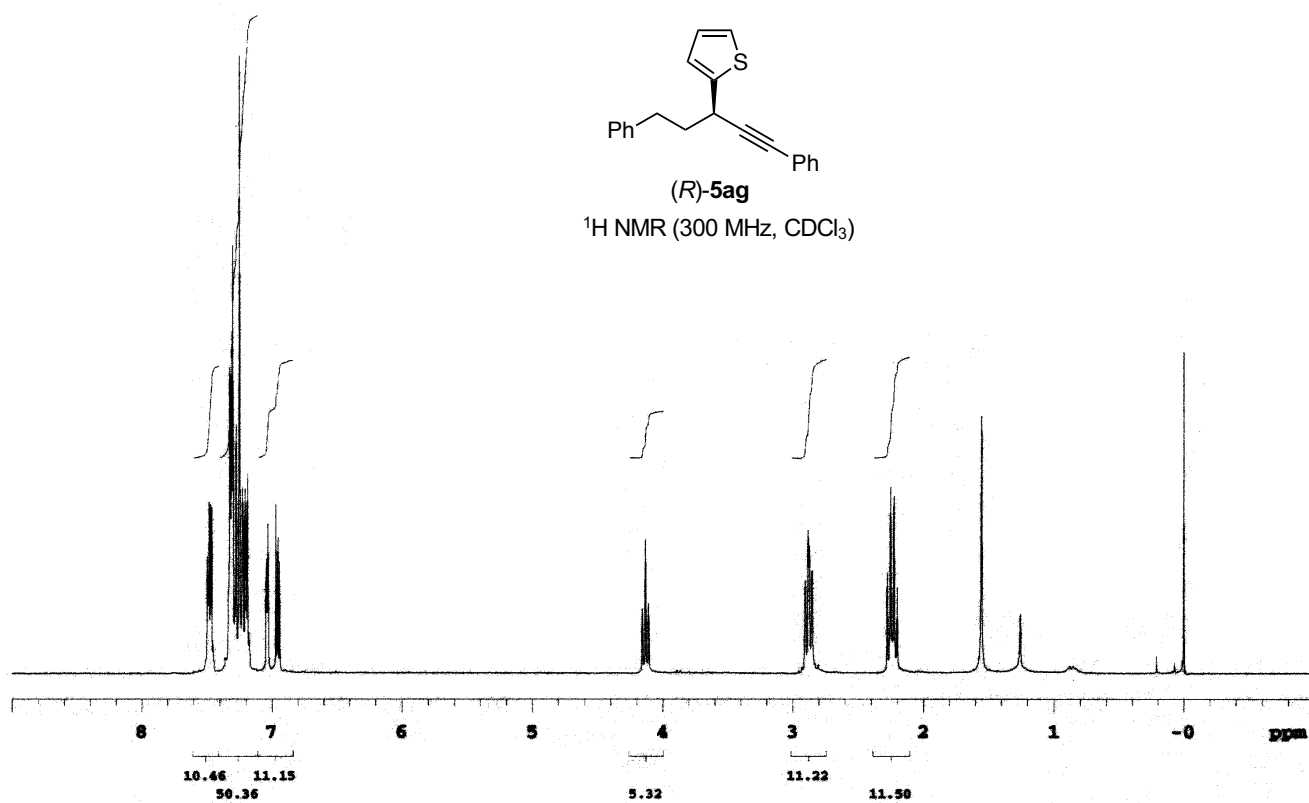

expansion of  $^1\text{H}$  NMR

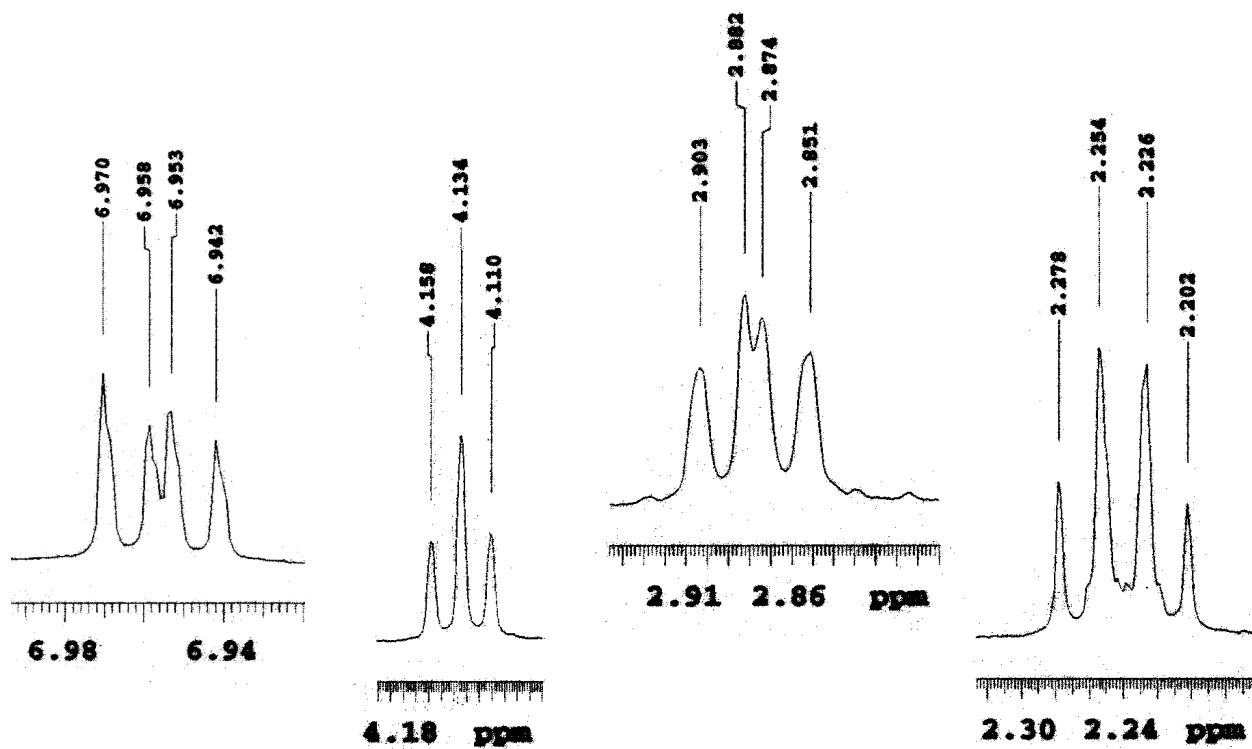



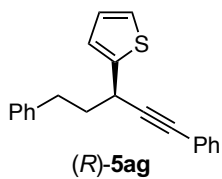

$$ee = (98.72 - 1.28) \times 100 / (98.72 + 1.28) = 97.44 \approx 97\%$$

$$es = 97 \times 100 / 98 = 99\%$$

Chiralpak AD-H, hexane/*i*-PrOH = 99.5:0.5, 0.3 mL/min, 25 °C

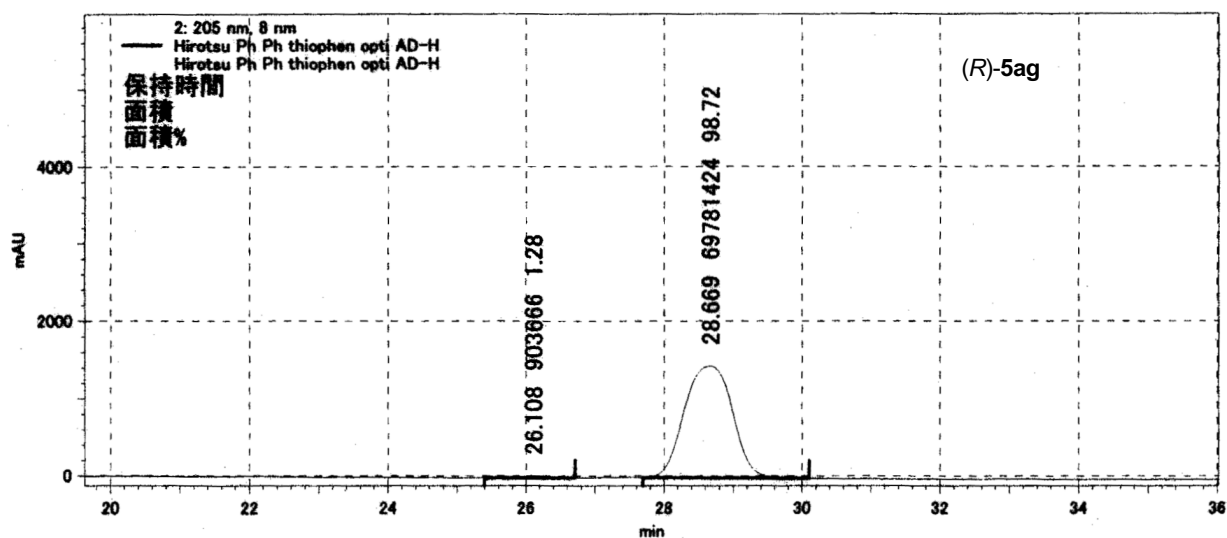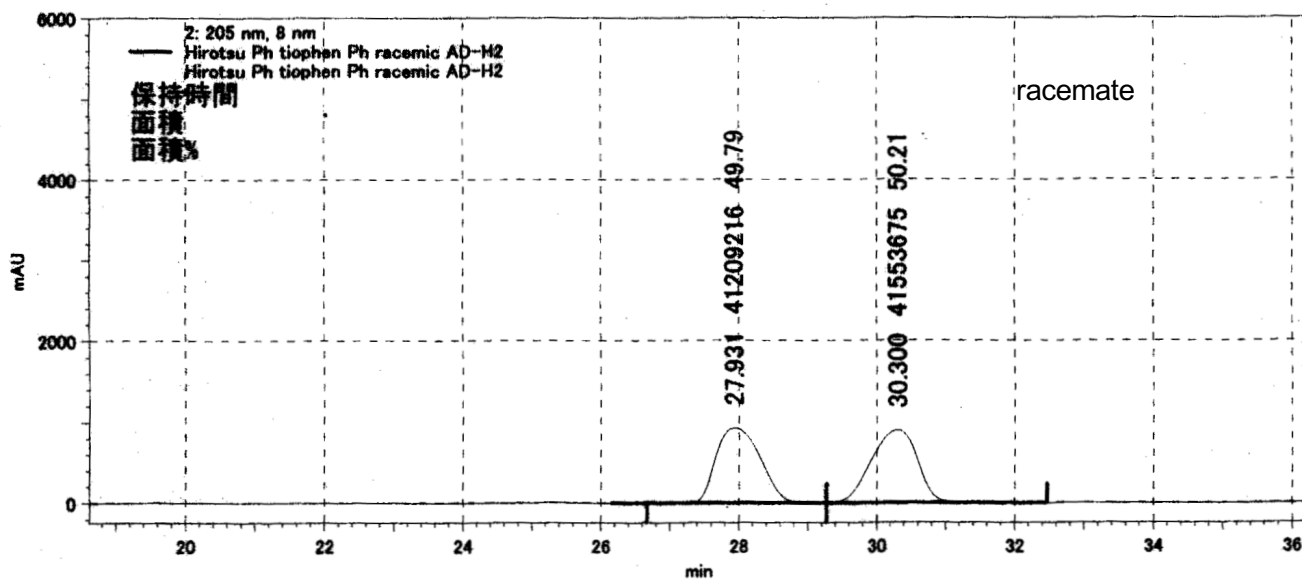

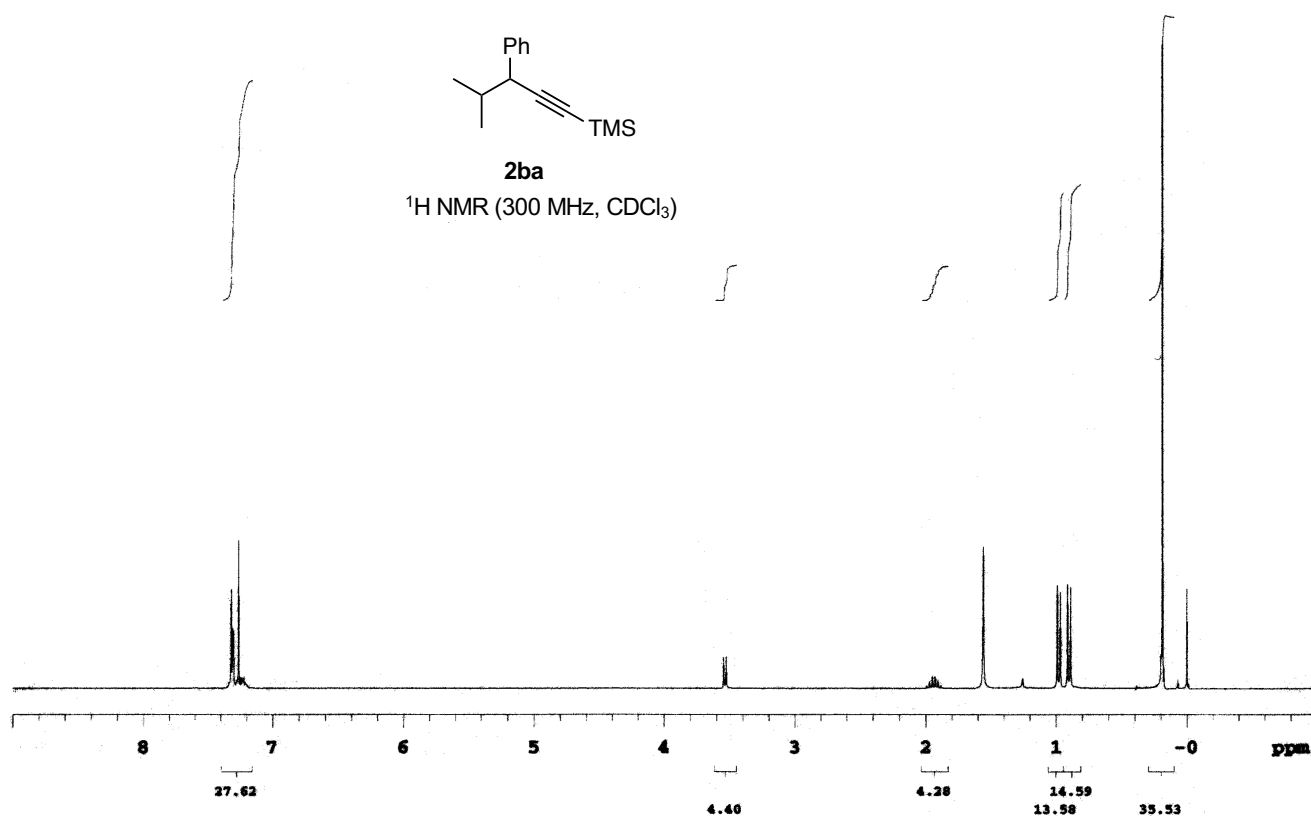

expansion of <sup>1</sup>H NMR

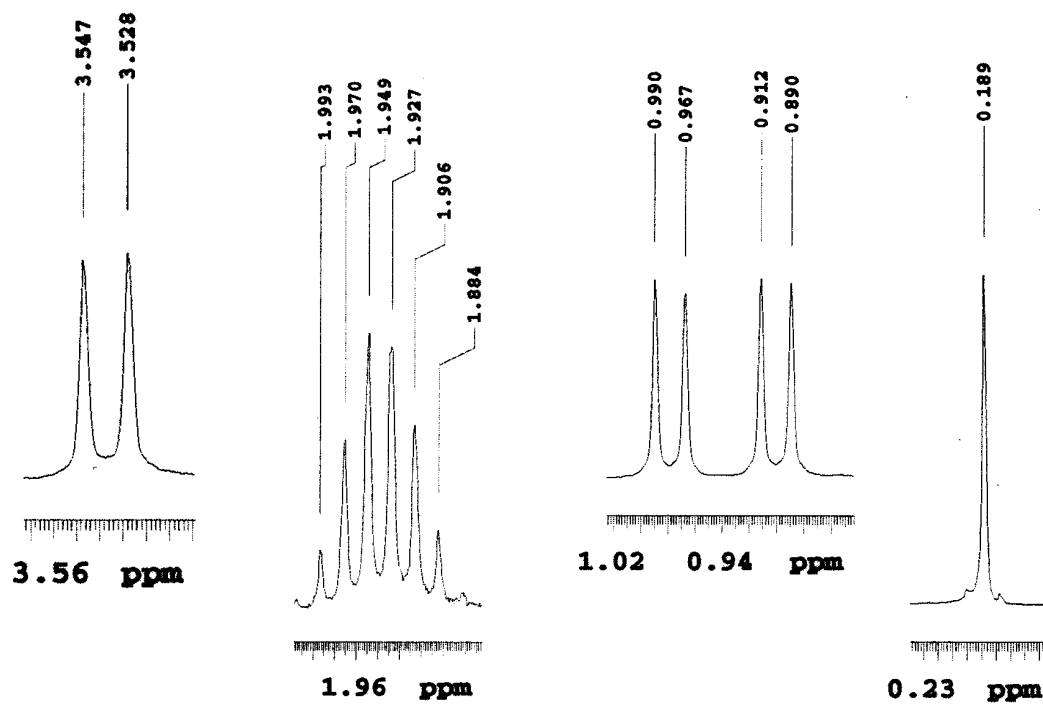

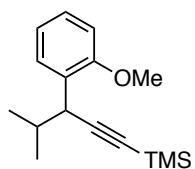

**2be**

$^1\text{H}$  NMR (300 MHz,  $\text{CDCl}_3$ )

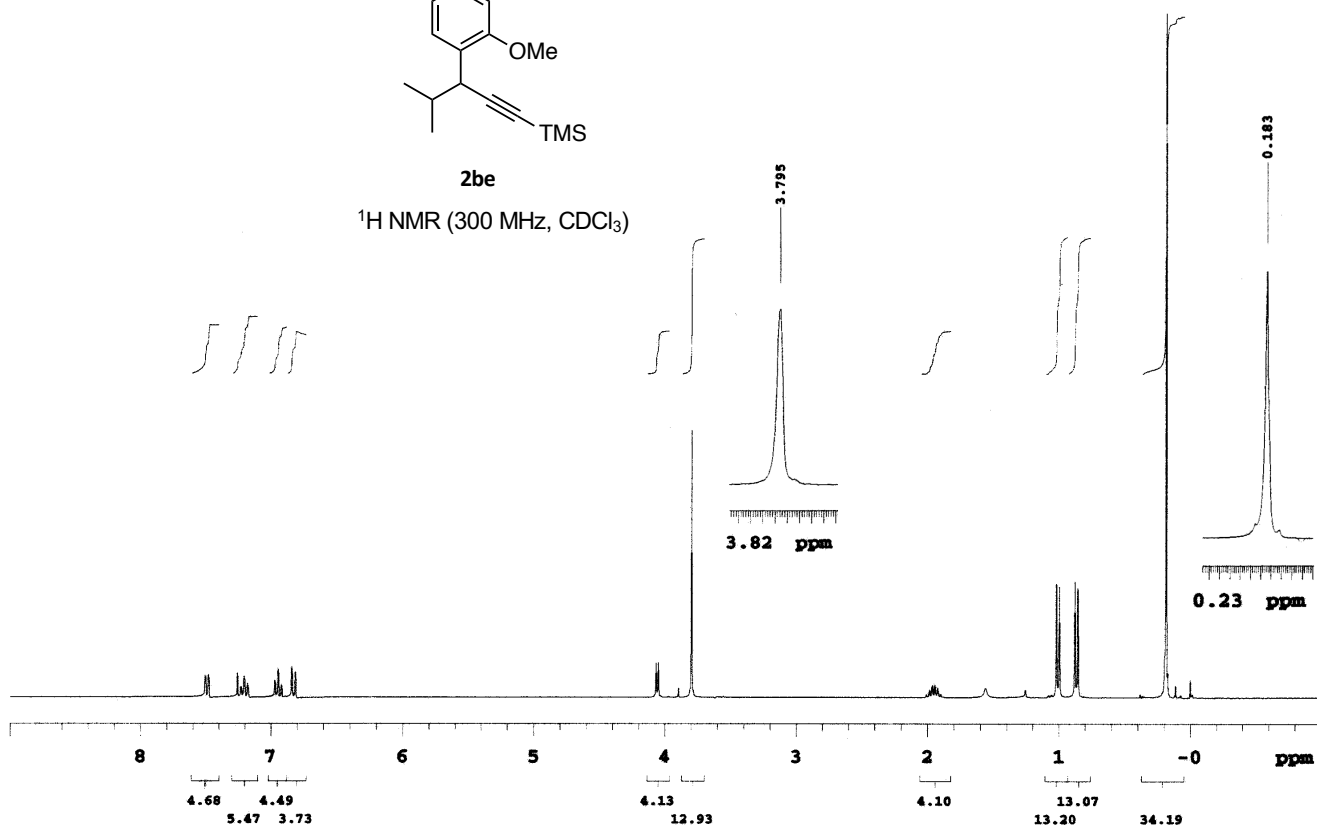

expansion of  $^1\text{H}$  NMR

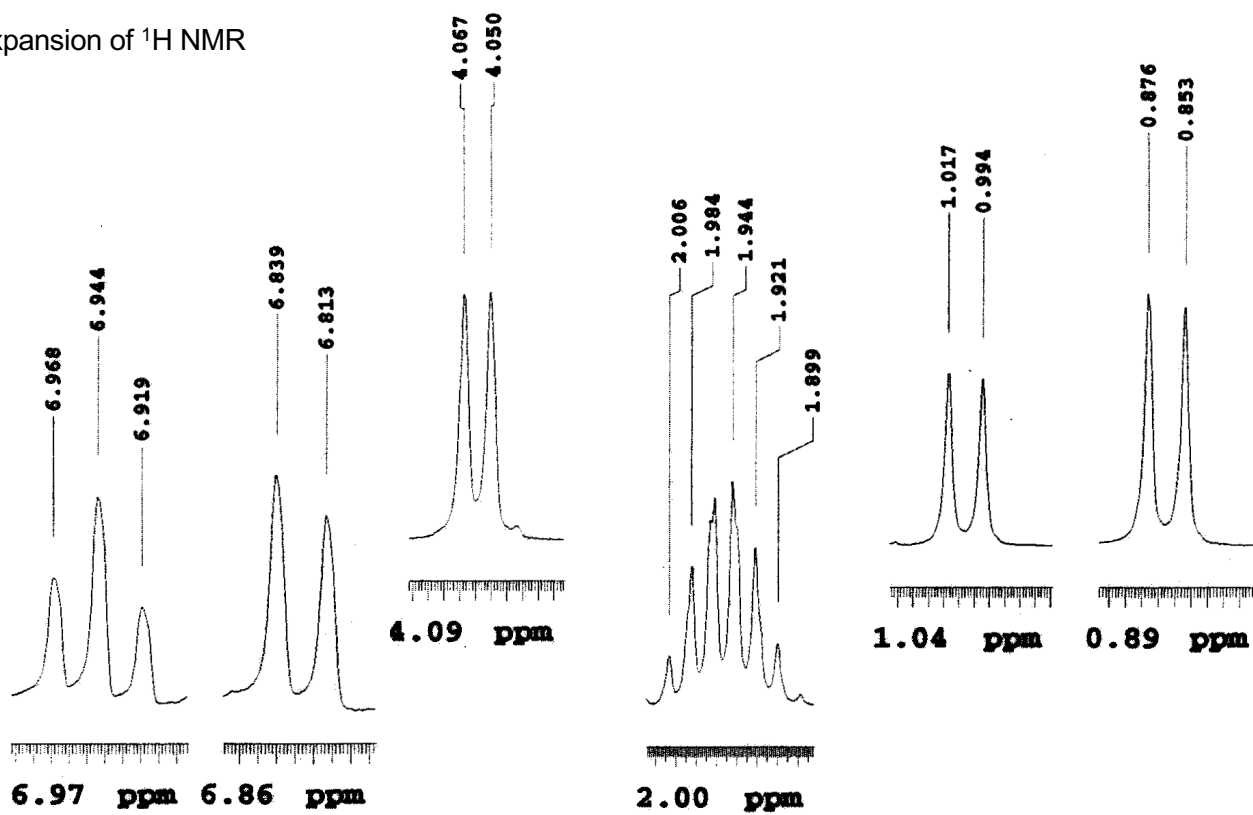

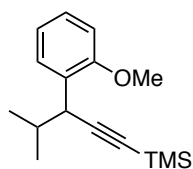

2be

$^{13}\text{C}$  NMR (75 MHz,  $\text{CDCl}_3$ )

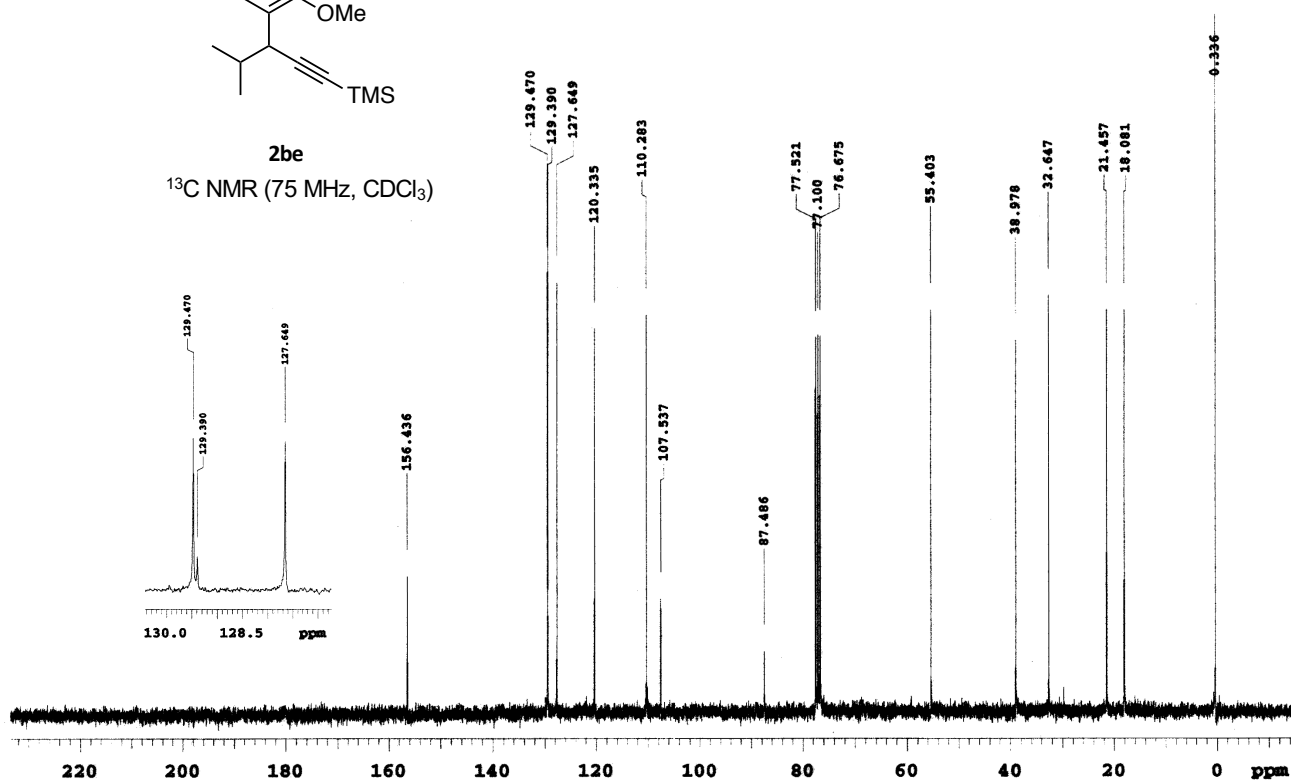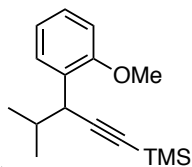

2be

$^{13}\text{C}$ -APT NMR (75 MHz,  $\text{CDCl}_3$ )

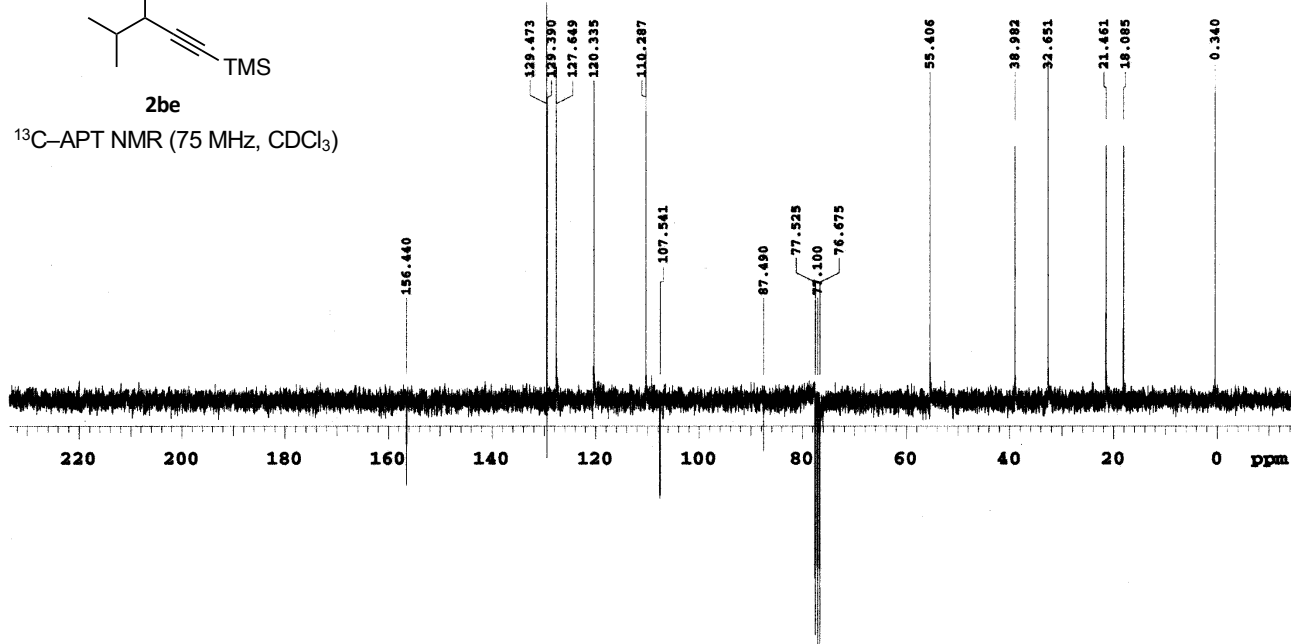

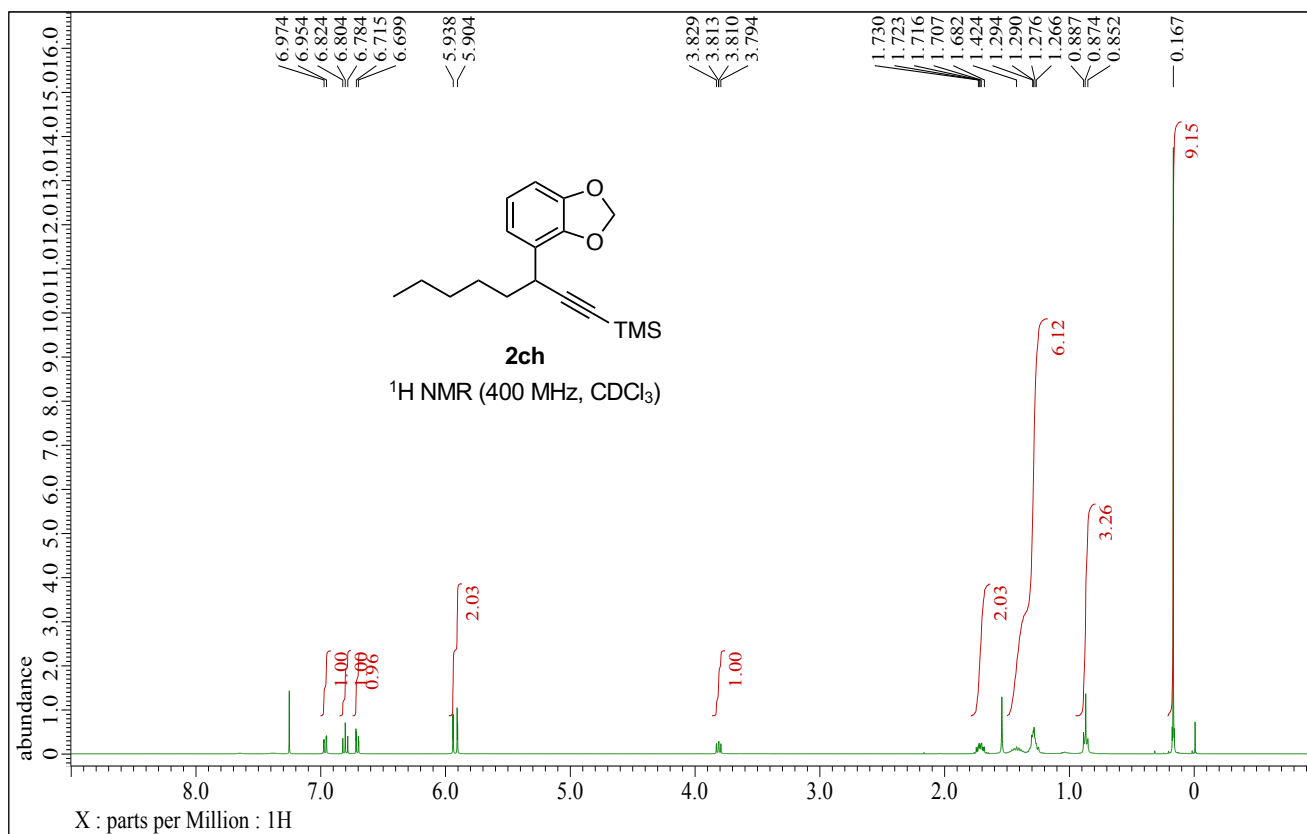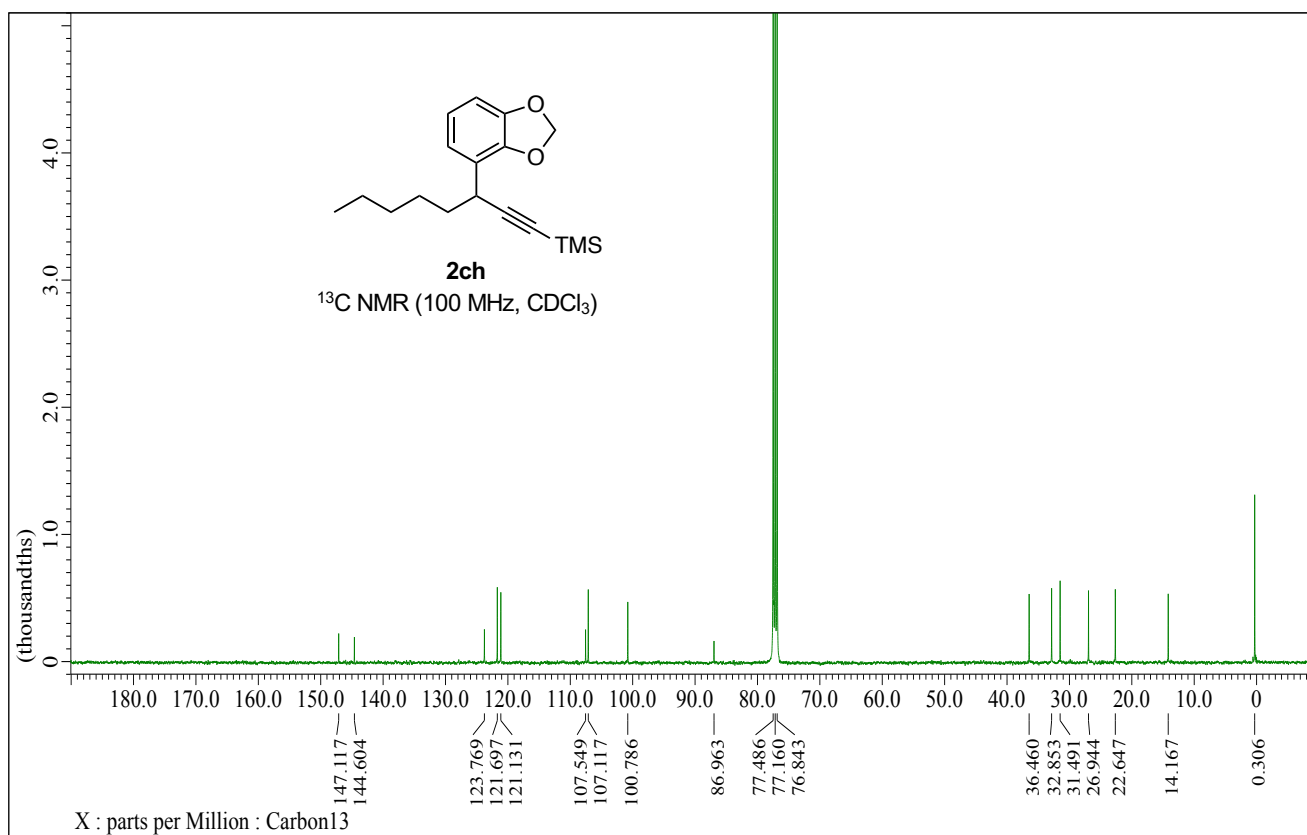

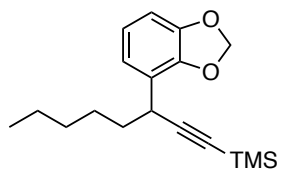

**2ch**

$^{13}\text{C}$ -APT NMR (75 MHz,  $\text{CDCl}_3$ )

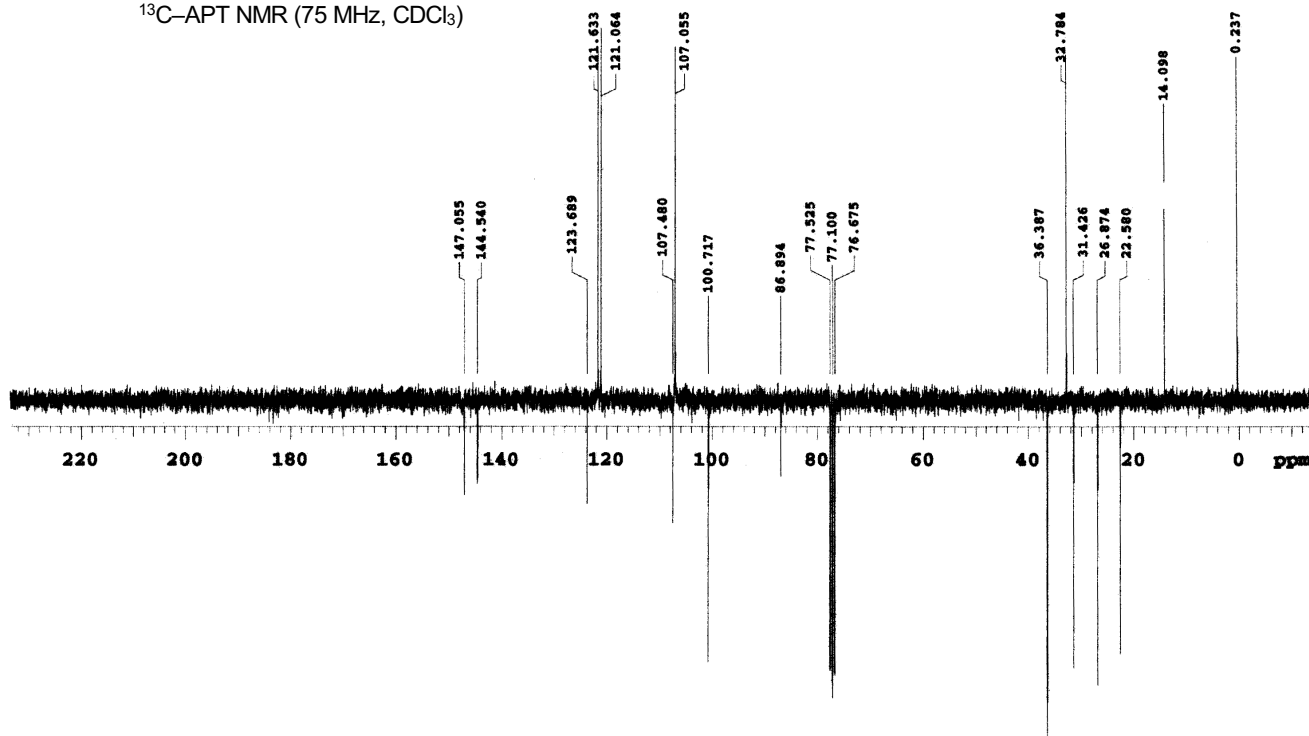

Expansion of  $^{13}\text{C}$ -APT NMR

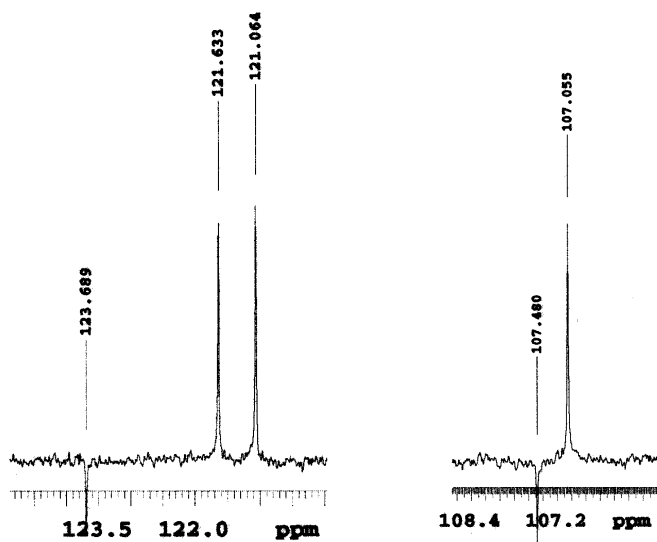

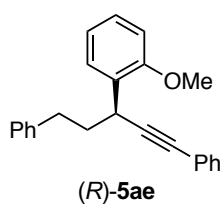

$$ee = \frac{96.86 - 3.14}{96.86 + 3.14} \times 100 = 93.72 \approx 94\%$$

$$es = \frac{94}{96} \times 100 = 97.92 \approx 98\%$$

Chiralcel OD-H, hexane/*i*-PrOH = 99.5:0.5, 0.3 mL/min, 25 °C

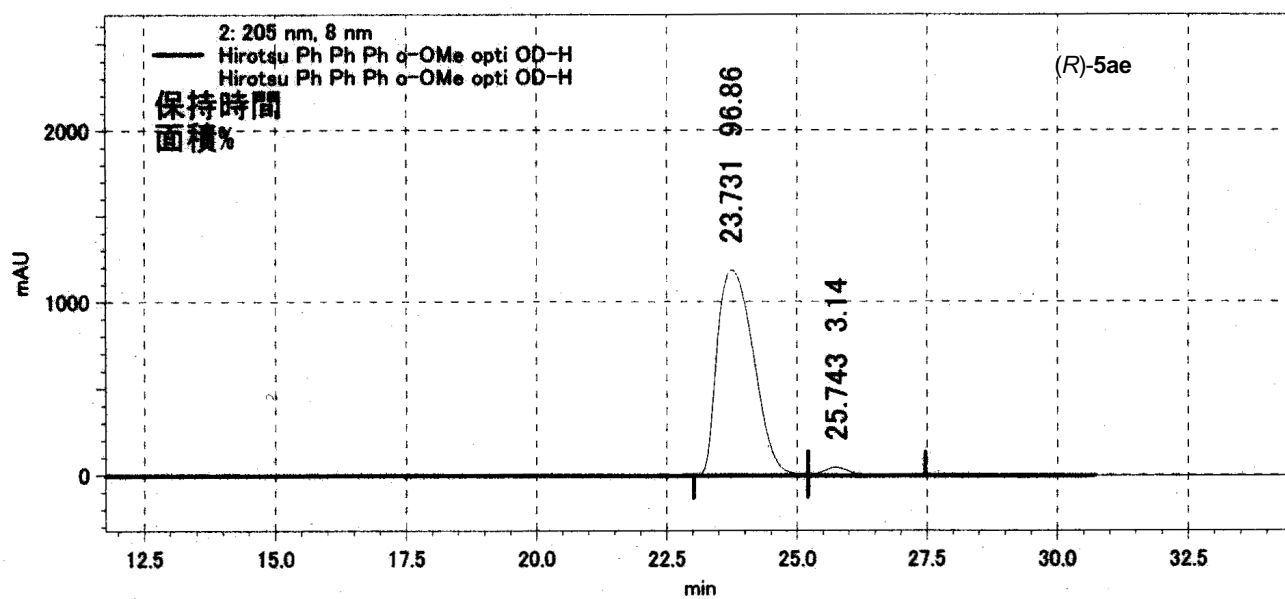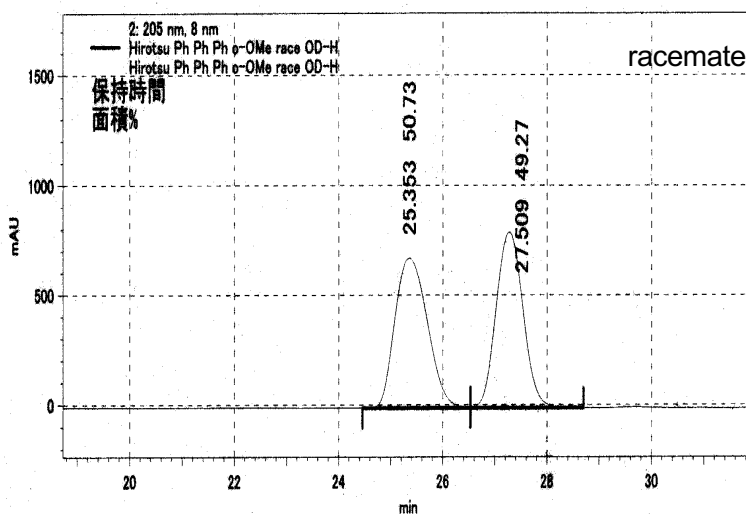

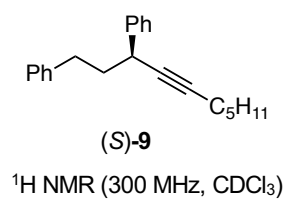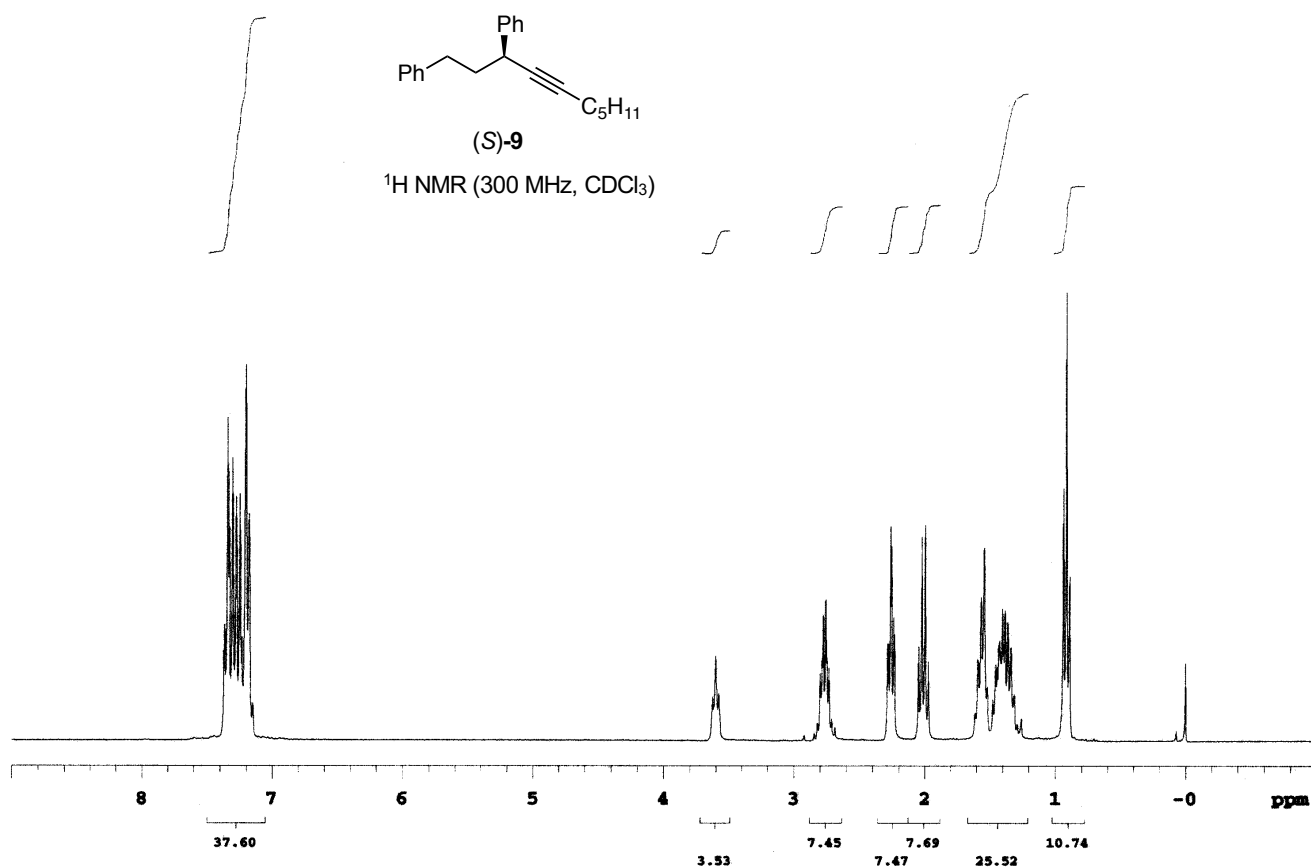

expansion of <sup>1</sup>H NMR

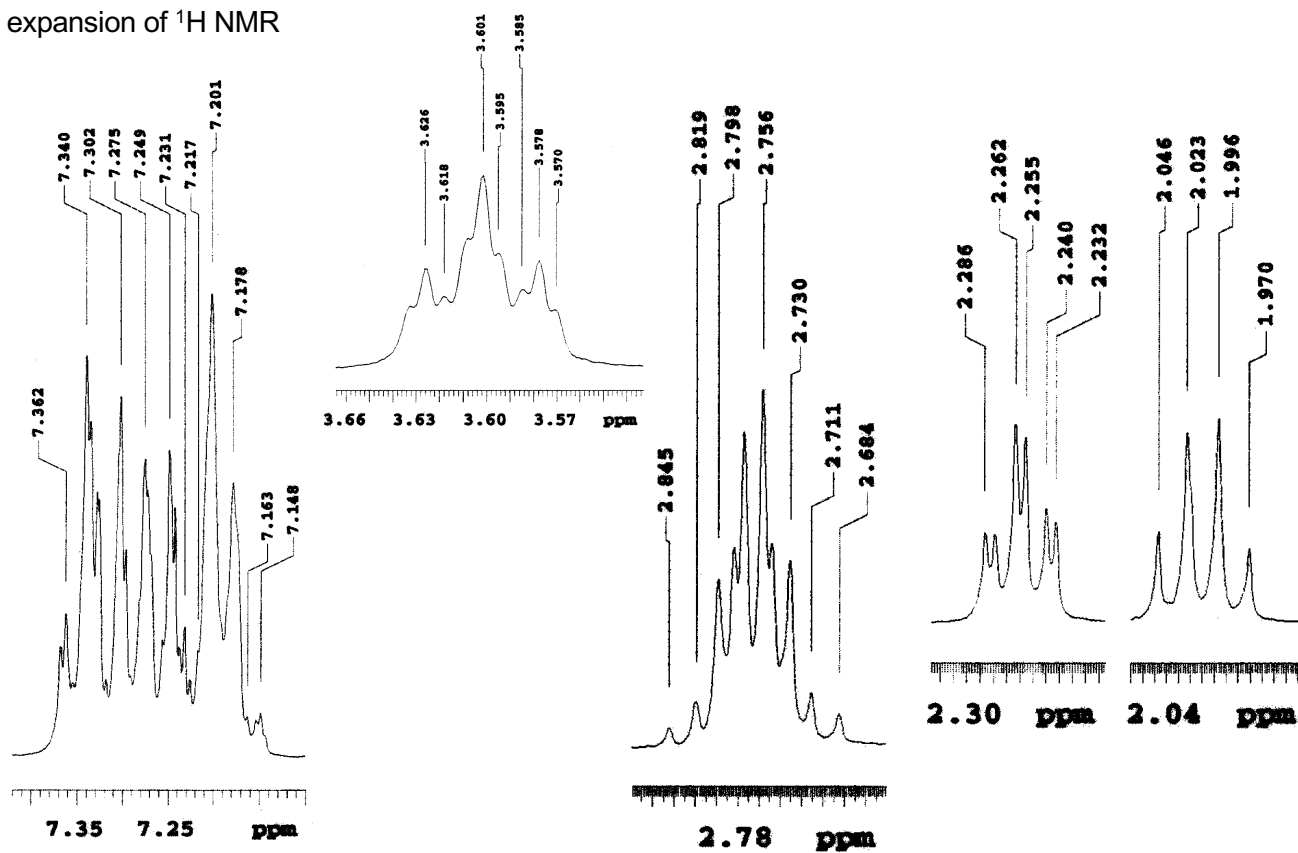



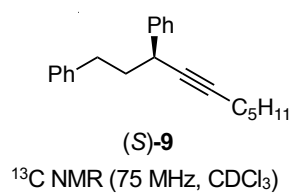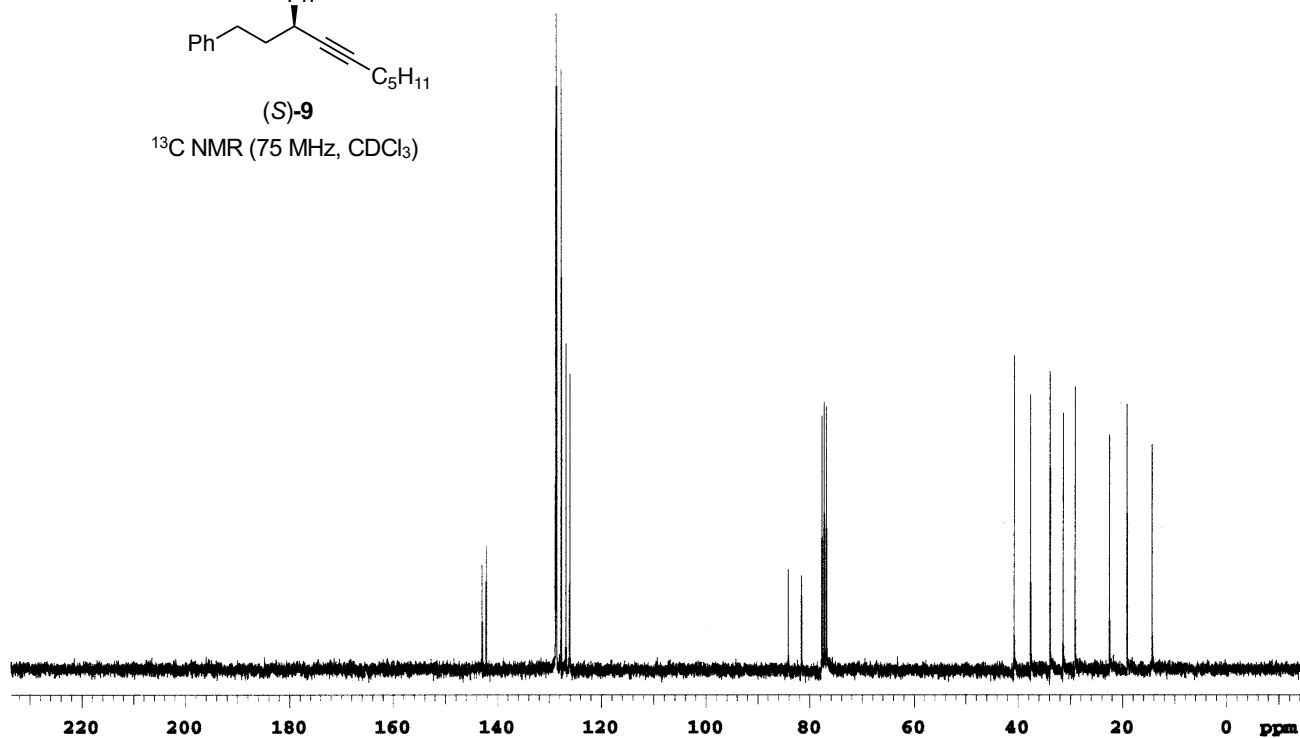

Expansion of <sup>13</sup>C–APT NMR

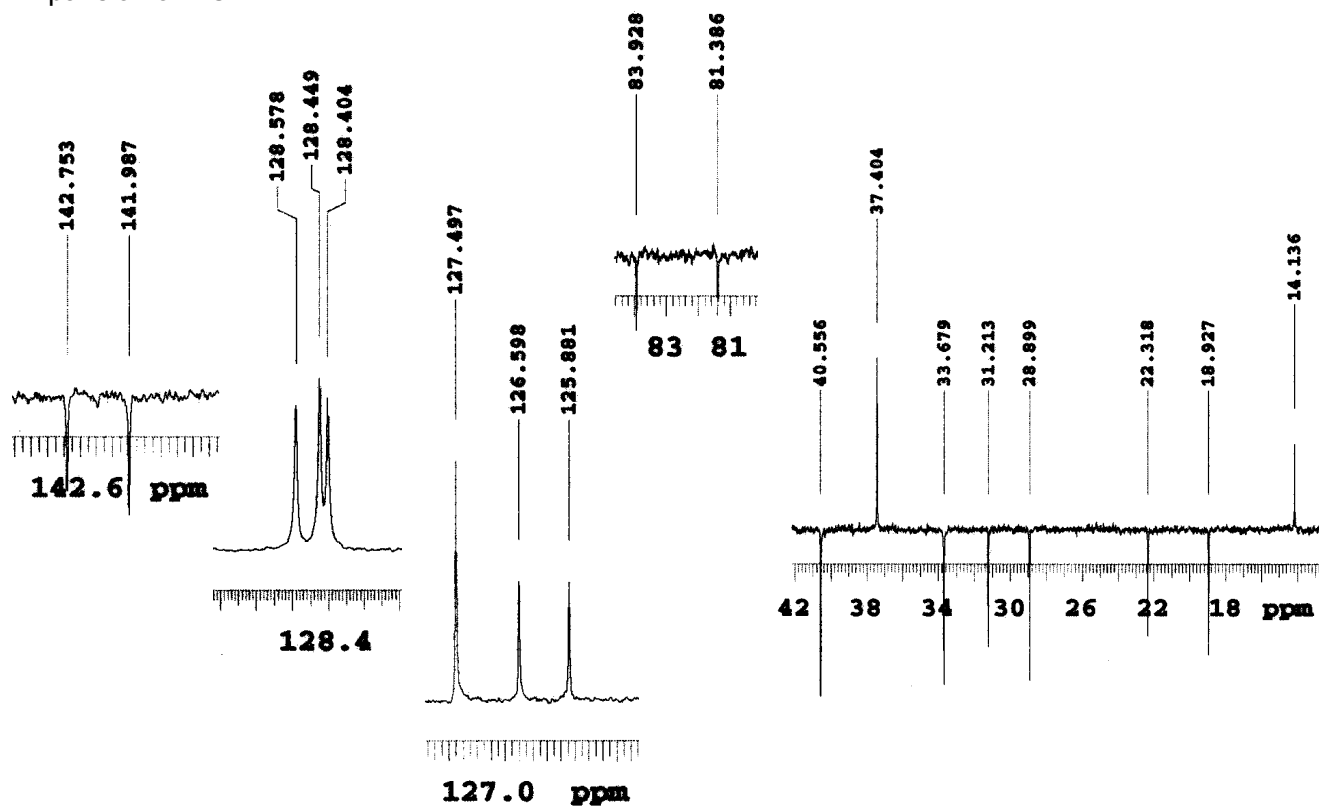

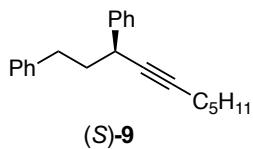

$$ee = (96.55 - 3.45) \times 100 / (96.55 + 3.45) = 93.1 \approx 93\%$$

$$es = 93 \times 100 / 95 = 97.89 \approx 98\%$$

Chiralcel OJ-H, hexane/*i*-PrOH = 99.9:0.1, 0.3 mL/min, 25 °C

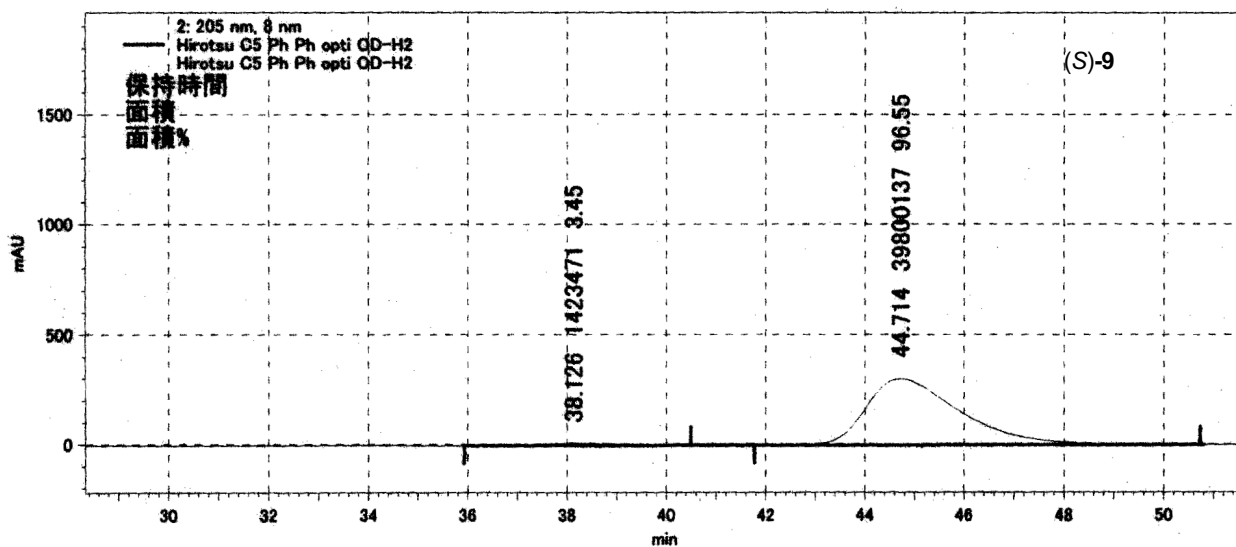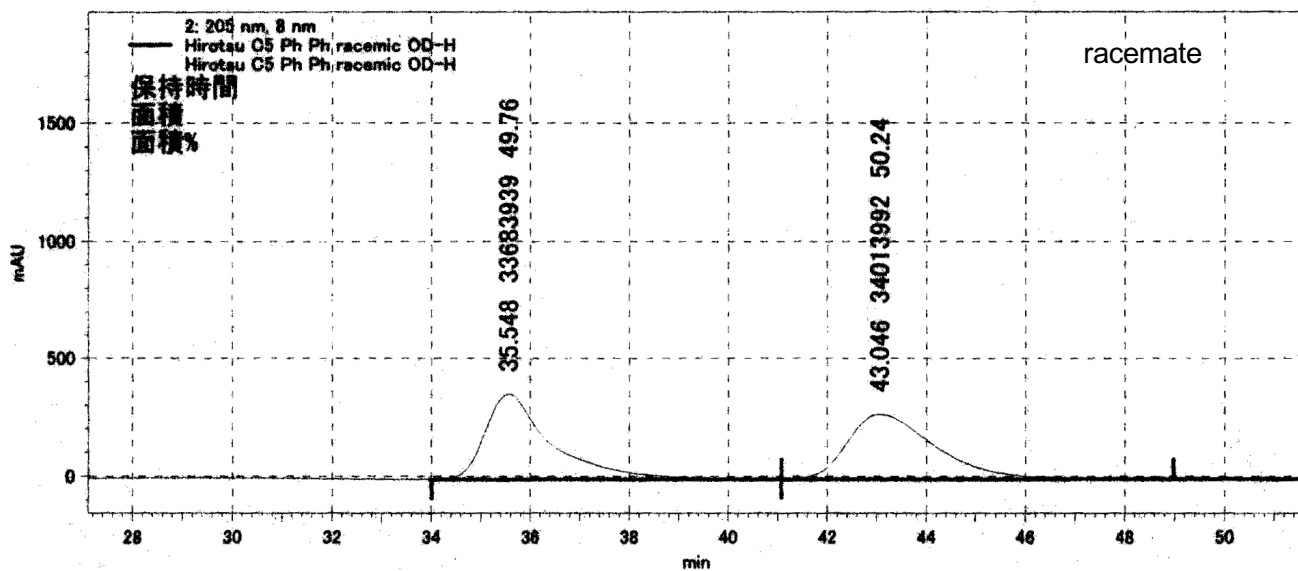

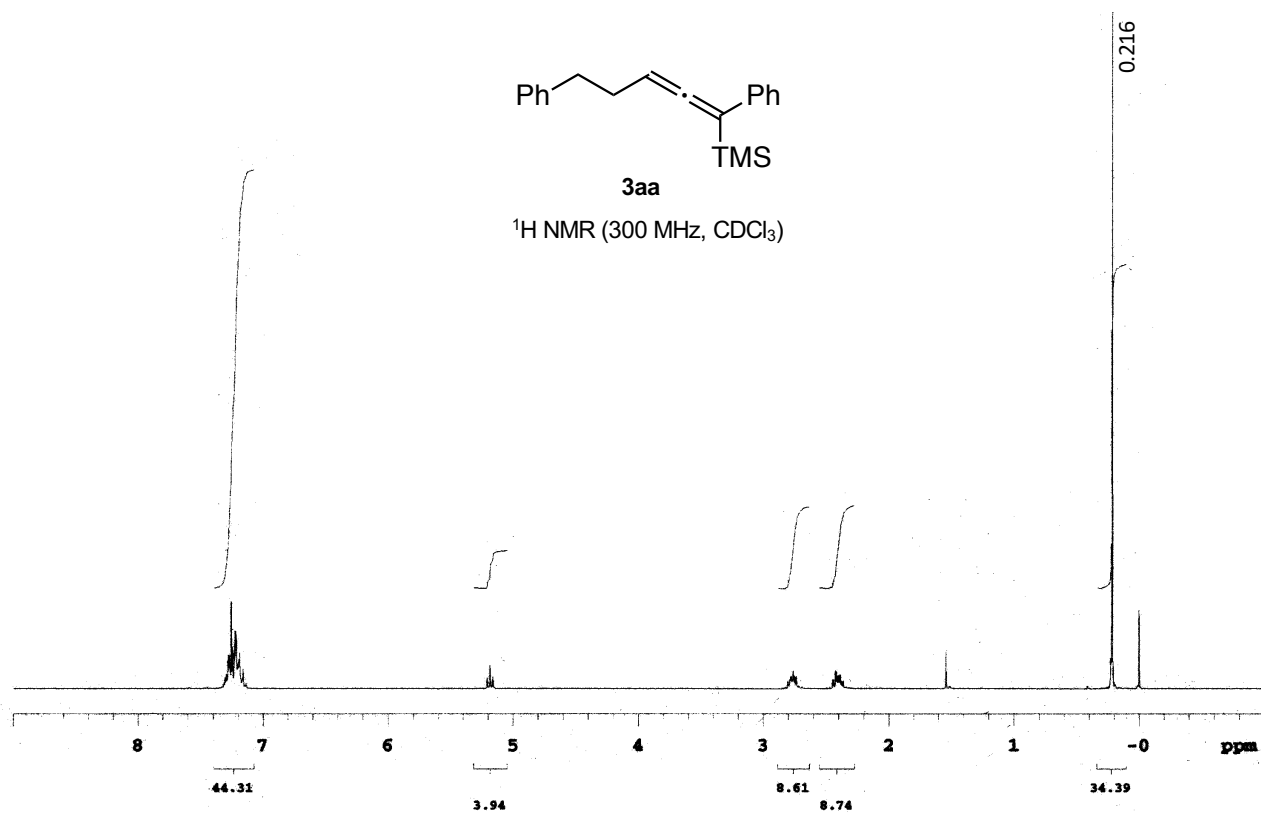

expansion of <sup>1</sup>H NMR

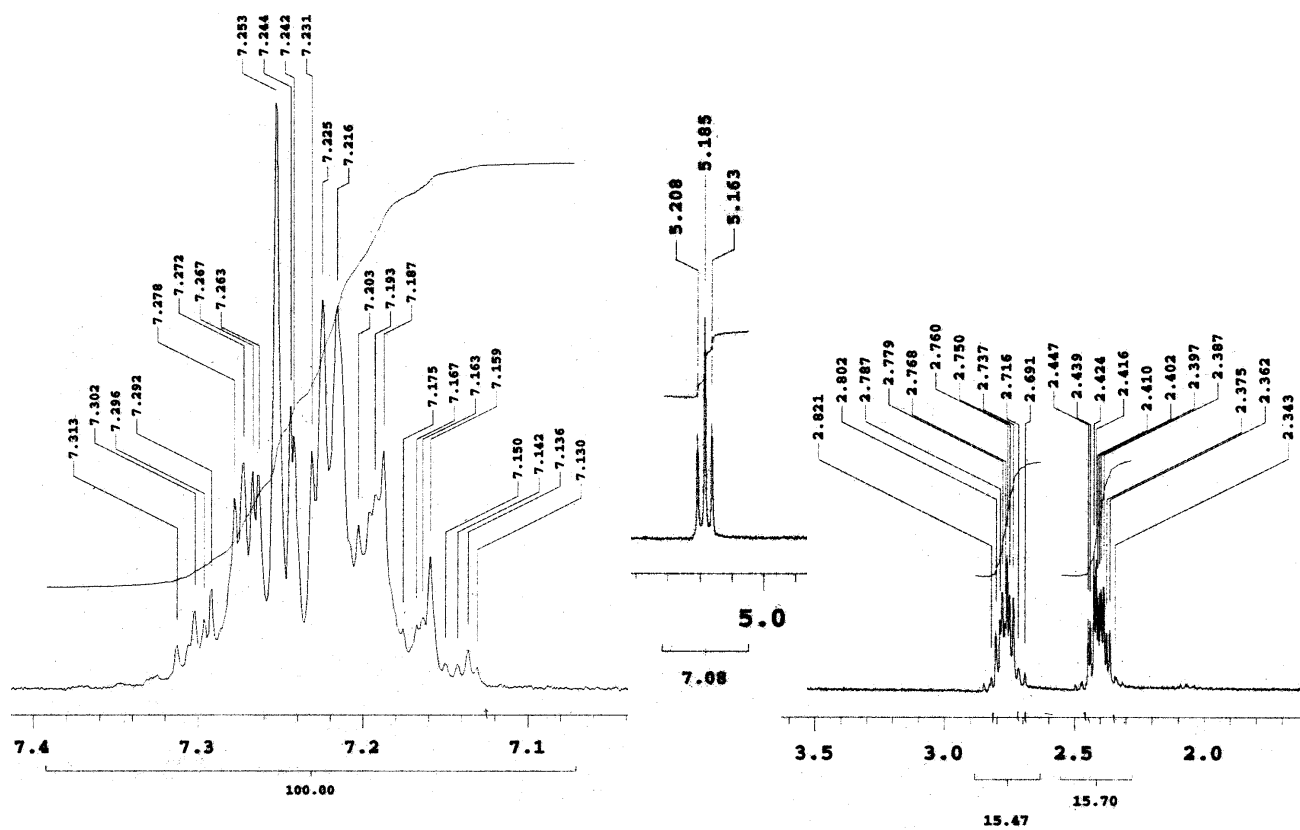

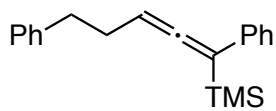

$^{13}\text{C}$  NMR (75 MHz,  $\text{CDCl}_3$ )

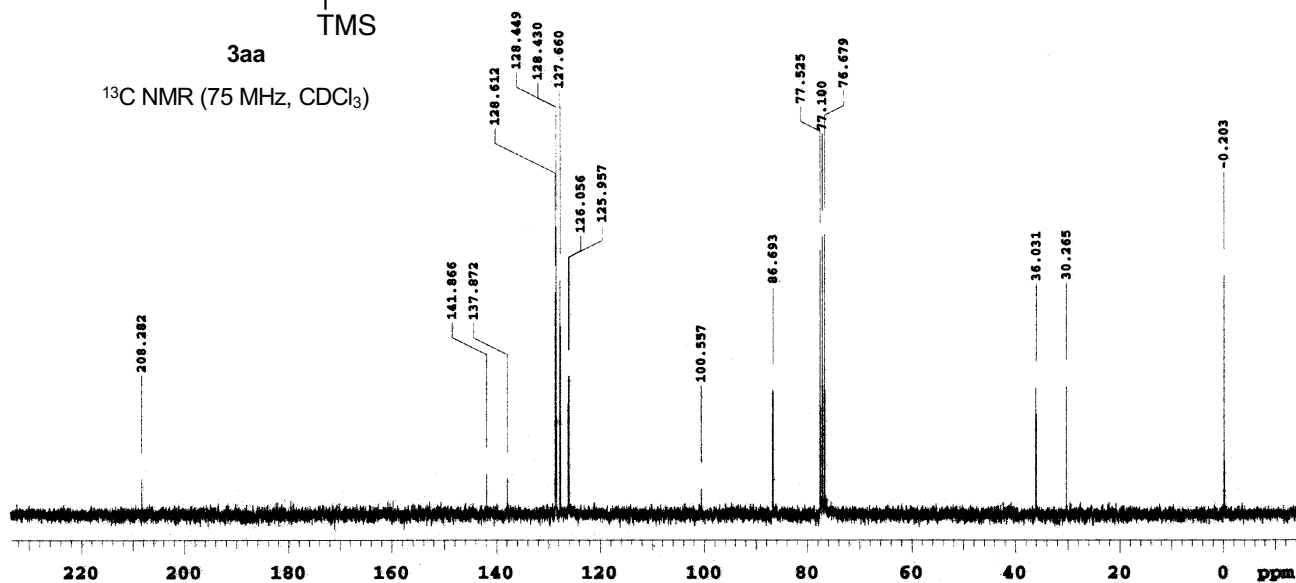

Expansion of  $^{13}\text{C}$ -APT NMR  
(up, minus; down, plus)

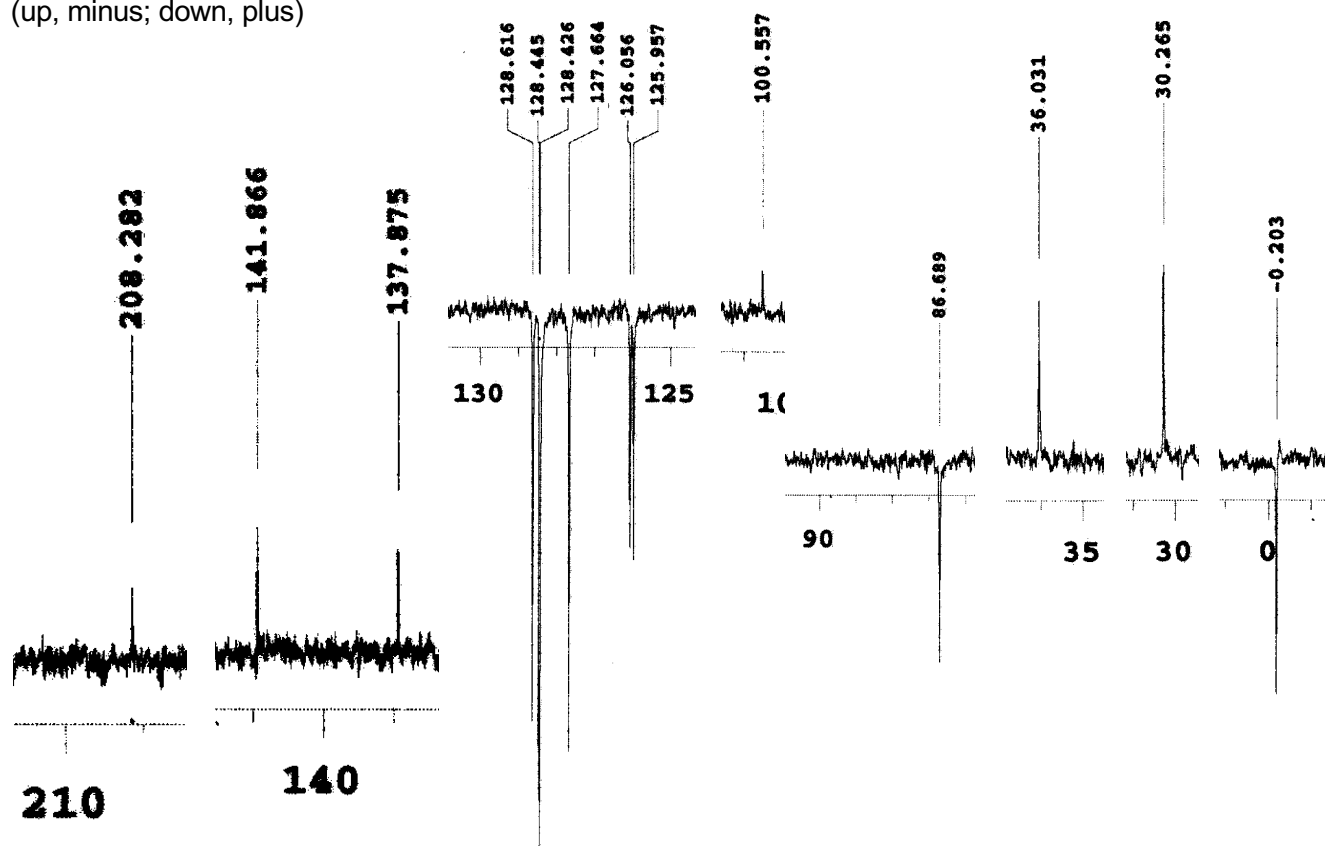

Supplement: s1 [file s1]
